# Supplementary material
Source: PubMed Central journal article supplement (PMC3723348)
Supplement: NIHMS486365-supplement-2_si_001.pdf [file NIHMS486365-supplement-2_si_001.pdf]

# Asymmetric NHC-Catalyzed Addition of Enals to Nitroalkenes: Controlling Stereochemistry Via the Homoenolate Reactivity Pathway To Access $\delta$ -Lactams

Nicholas A. White, Daniel A. DiRocco, and Tomislav Rovis\*

*Department of Chemistry, Colorado State University Fort Collins, Colorado 80523*

## Table of Contents:

|                                                                                |    |
|--------------------------------------------------------------------------------|----|
| Materials and Methods .....                                                    | 2  |
| General Procedure for the Asymmetric Homoenolate Addition to Nitroalkenes..... | 3  |
| General Procedure for the 1-pot synthesis of $\delta$ -Lactams .....           | 3  |
| Reaction Optimization .....                                                    | 4  |
| Characterization Data.....                                                     | 5  |
| General Procedure for the synthesis of Nitroalkenes.....                       | 19 |
| Proposed Stereochemical Models.....                                            | 20 |
| $^1\text{H}$ and $^{13}\text{C}$ NMR Spectra for New Compounds.....            | 22 |
| Crystallographic Data .....                                                    | 55 |
| References.....                                                                | 63 |

**Materials and Methods**

All reactions were carried out under an atmosphere of argon in flame-dried glassware with magnetic stirring. Dichloromethane was degassed with argon and passed through two columns of neutral alumina. Toluene was degassed with argon and passed through one column of neutral alumina and one column of Q5 reactant. Methanol was purchased from Fisher Scientific and dried with activated 3Å molecular sieves. N,N-Diisopropylethylamine was purchased from Aldrich and distilled from Calcium hydride prior to use. Column chromatography was performed on SiliCycle®SilicaFlash® P60, 40-63µm 60A. Thin layer chromatography was performed on SiliCycle® 250µm 60A plates. Visualization was accomplished with UV light or KMnO<sub>4</sub> stain followed by heating.

<sup>1</sup>H NMR spectra were recorded on Varian 300 or 400 MHz spectrometers at ambient temperature. Data is reported as follows: chemical shift in parts per million (δ, ppm) from CDCl<sub>3</sub> (7.26 ppm) or acetone-D<sub>6</sub> (2.03 ppm), multiplicity (s = singlet, bs = broad singlet, d = doublet, t = triplet, q = quartet, and m = multiplet), coupling constants (Hz). <sup>13</sup>C NMR were recorded on Varian 300 or 400 MHz spectrometers (at 75 or 100 MHz) at ambient temperature. Chemical shifts are reported in ppm from CDCl<sub>3</sub> (77.36 ppm) or acetone-D<sub>6</sub> (205.87, 30.6 ppm).

Aldehydes were either purchased from Aldrich or prepared via literature procedures. Nitroalkenes were prepared according to the general procedure as described within.

### General Procedure for the Synthesis of Nitro-Esters

To a screw cap vial charged with a stirbar was added triazolium salt **5f** (15 mg, 0.025 mmol) and NaOAc (10 mg, .125 mmol). This vial was then fitted with a rubber septum and evacuated and refilled with argon three times. 0.75 ml EtOH was then added via syringe. To this solution was then added (*E*)-1-nitrobut-1-ene **2a** (26  $\mu$ L, 0.25 mmol, 1 equiv) followed by *trans*-cinnamaldehyde **1a** (49  $\mu$ L, 0.375 mmol, 1.5 equiv). The septum was then quickly removed and replaced with a screw cap. This was then allowed to stir at ambient temperature for 12 hours. After 12 hours the reaction was concentrated via rotary evaporation and then purified by silica gel chromatography (8:2 hexanes:ether) to yield 49 mg (70 %) (3*S*,4*R*)-ethyl 4-(nitromethyl)-3-phenylhexanoatein **3a** as a colorless oil.

### General Procedure for One-Pot Synthesis of $\delta$ -Lactams

To a screw cap vial charged with a stirbar was added triazolium salt **5f** (15 mg, 0.025 mmol) and NaOAc (10 mg, .125 mmol). This vial was then fitted with a rubber septum and evacuated and refilled with argon three times. 0.75 mL EtOH was then added via syringe. To this solution was then added (*E*)-1-nitrobut-1-ene **2a** (26  $\mu$ L, 0.25 mmol, 1 equiv) followed by *trans*-cinnamaldehyde **1a** (49  $\mu$ L, 0.375 mmol, 1.5 equiv). The septum was then quickly removed and replaced with a screw cap. This was then allowed to stir at ambient temperature for 12 hours. After 12 hours the screw cap was removed and Zinc dust (165 mg, 2.5 mmol) was added followed by 0.75 mL AcOH. The screw cap was replaced and the reaction was then heated to reflux in an oil bath. After four hours the vial was removed from the oil bath and allowed to cool. Upon cooling, the reaction was filtered through celite and rinsed with 10 ml EtOAc. The filtrate was then diluted with an additional 10 ml EtOAc and quenched with 20 mL saturated NaHCO<sub>3</sub>. The organic layer was then separated, washed with brine (1 x 20mL), dried (Na<sub>2</sub>SO<sub>4</sub>), and concentrated *in vacuo*. The crude residue was then subjected to column chromatography (1:1 hexanes:EtOAc) to yield 32 mg (63 %) (4*S*,5*R*)-5-ethyl-4-phenylpiperidin-2-one **6a** as a white solid.

## Reaction Optimization:

## Base Screen:

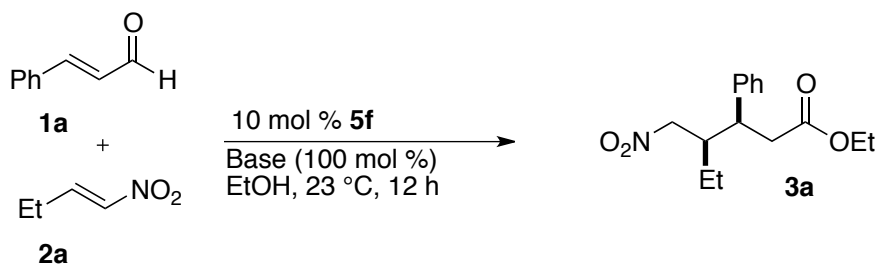

| Solvent                        | Yield |
|--------------------------------|-------|
| NaOAc                          | 49 %  |
| K <sub>3</sub> PO <sub>4</sub> | 31 %  |
| <i>i</i> -Pr <sub>2</sub> NEt  | 6 %   |
| DBU                            | trace |
| Et <sub>3</sub> N              | 8 %   |
| KHCO <sub>3</sub>              | trace |

## Base Equiv. Screen:

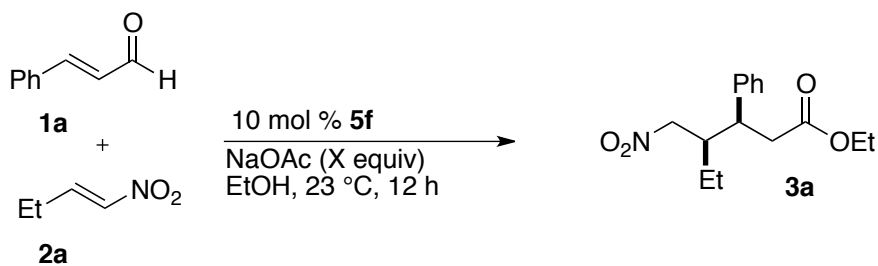

| Base Eq. | Yield |
|----------|-------|
| 0.25     | 65 %  |
| 0.3      | 66 %  |
| 0.5      | 69 %  |
| 0.6      | 60 %  |
| 0.75     | 46 %  |
| 1.0      | 49 %  |
| 1.5      | 46 %  |
| 2.0      | 57 %  |
| 4.0      | 42 %  |

## Solvent Screen:

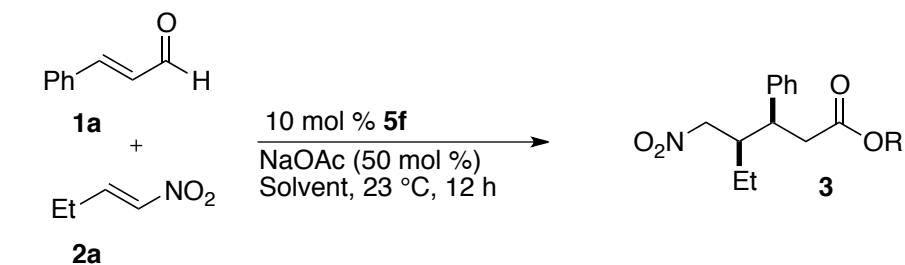

| Solvent                    | Yield |
|----------------------------|-------|
| MeOH                       | 56 %  |
| EtOH                       | 70 %  |
| <i>i</i> -PrOH             | 21 %  |
| EtOH: <i>t</i> BuOH (10:1) | 9 %   |
| EtOH:DCM (10:1)            | trace |
| EtOH:Toluene (10:1)        | trace |

## Characterization Data:

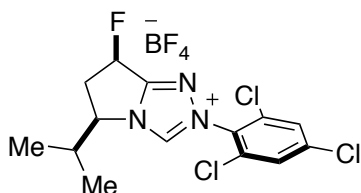

**Triazolium Salt (5c)** To a flame-dried flask with magnetic stir bar was added (3*R*,5*R*)-3-fluoro-5-isopropylpyrrolidin-2-one<sup>1</sup> (290.3 mg, 2.0 mmol, 1.0 equiv). The flask was then evacuated and back-filled with argon. Dichloromethane (15 mL) and trimethyloxonium tetrafluoroborate (296 mg, 2.0 mmol, 1.0 equiv) were then added via powder funnel. The heterogeneous mixture was stirred at room temperature until the reaction was homogeneous (about 6 hours). (2,4,6-trichlorophenyl)hydrazine (422.9 mg, 2.0 mmol, 1.0 equiv) was added in one portion and the mixture was stirred for 18 hours at which point dichloromethane was removed *in vacuo*. Trimethylorthoformate (20 mL) was then added and the solution was heated in a 110 °C oil bath for 1 h. After cooling to room temperature, the reaction concentrated *in vacuo* and 20 mL chlorobenzene was added and the solution was refluxed for 10 minutes. Upon cooling in an ice bath the product precipitated out and was filtered to yield triazolium salt (5c) (366 mg, 42 %) as an off-white solid.  $[\alpha]_{\text{D}}^{21} = 11.8$  ( $c = 0.010$  g/ml, acetone); <sup>1</sup>H-NMR (400 MHz; acetone-*d*<sub>6</sub>):  $\delta$  10.60 (s, 1H), 7.97 (s, 2H), 6.55 (ddd,  $J = 54.7, 7.6, 2.1$  Hz, 1H), 5.26-5.20 (m, 1H), 3.72-3.57 (m, 1H), 3.00-2.88 (m, 1H), 2.58 (dq,  $J = 12.8, 6.5$  Hz, 1H), 1.10 (dd,  $J = 30.7, 6.8$  Hz, 6H). <sup>13</sup>C-NMR (101 MHz; acetone):  $\delta$  160.3, 160.1, 143.9, 139.3, 134.1, 130.2, 129.5, 84.4, 82.6, 66.6, 37.1, 36.8, 31.5, 17.3, 16.2 **IR** (ATR, neat) 2960, 1571, 1054, 1034, 825  $\text{cm}^{-1}$ ; **LRMS** (ESI + APCI)  $m/z$  [M+H] calcd 348.0, found 348.01

Supporting Information

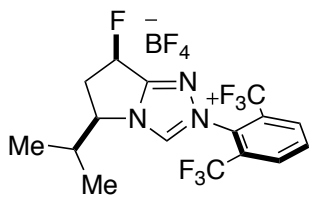

Triazolium Salt (**5d**): To a flame-dried flask with magnetic stir bar was added (3*R*,5*R*)-3-fluoro-5-isopropylpyrrolidin-2-one<sup>1</sup> (290.3 mg, 2.0 mmol, 1.0 equiv). The flask was then evacuated and back-filled with argon. Dichloromethane (15 mL) and trimethyloxonium tetrafluoroborate (296 mg, 2.0 mmol, 1.0 equiv) were then added via powder funnel. The heterogeneous mixture was stirred at room temperature until the reaction was homogeneous (about 6 hours). (2,6-bis(trifluoromethyl)phenyl)hydrazine (488.3 mg, 2.0 mmol, 1.0 equiv) was added in one portion and the mixture was stirred for 18 hours at which point dichloromethane was removed *in vacuo*. Trimethylorthoformate (20 mL) was then added and the solution was heated in a 110 °C oil bath for 1 h. After cooling to room temperature, the reaction concentrated *in vacuo* and purified by column chromatography to yield triazolium salt (**5d**) (234 mg, 25 %) as an off-white solid  $R_f = 0.41$  (19:1 CH<sub>2</sub>Cl<sub>2</sub>:MeOH)  $[\alpha]_D^{21} = 20.6$  ( $c = 0.010$  g/mL, acetone); <sup>1</sup>H-NMR (400 MHz; acetone-d<sub>6</sub>):  $\delta$  10.73 (s, 1H), 8.48 (d,  $J = 8.0$  Hz, 2H), 8.37-8.32 (m, 1H), 6.60 (ddd,  $J = 54.7, 7.7, 1.9$  Hz, 1H), 5.34 (dq,  $J = 8.5, 4.2$  Hz, 1H), 3.69 (dddd,  $J = 27.5, 16.0, 8.6, 7.5$  Hz, 1H), 2.96 (dddd,  $J = 28.3, 15.8, 3.3, 2.0$  Hz, 1H), 2.65-2.57 (m, 1H), 1.07 (dd,  $J = 33.0, 6.9$  Hz, 6H). <sup>13</sup>C-NMR (101 MHz; acetone):  $\delta$  160.0, 159.7, 144.51, 144.49, 144.46, 134.95, 134.92, 132.34, 132.30, 132.25, 132.21, 132.18, 132.13, 132.09, 132.04, 129.3, 129.06, 129.01, 128.7, 126.0, 123.5, 123.2, 120.8, 120.5, 84.4, 82.6, 66.9, 36.8, 36.6, 31.5, 17.1, 15.6; IR (ATR, neat) 2972, 2925, 1513, 1295, 1140, 1052, 1035, 836, 676 cm<sup>-1</sup>; LRMS (ESI + APCI)  $m/z$  [M+H] calcd 382.1, found 382.1

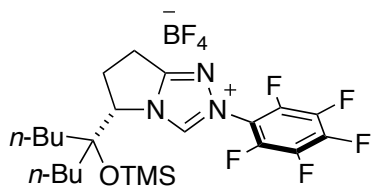

Triazolium Salt (**5f**): (*S*)-5-(5-hydroxynonan-5-yl)pyrrolidin-2-one (**S2**) (1.136 g, 5 mmol, 1 equiv) was dissolved in CH<sub>2</sub>Cl<sub>2</sub> (50 mL) and cooled to 0 °C in an ice bath. Trimethylsilyl trifluoromethanesulfonate (2.12 mL, 11.7 mmol, 2.33 equiv) and 2,6-lutidine (1.7 mL, 12 mmol, 3 equiv) were added dropwise to the cooled solution. The solution was allowed to stir at 0 °C for 1.5 hours and then allowed to warm to room temperature and stir for 12 hours. After 12 hours the reaction was cooled to 0 °C and quenched with 50 mL saturated ammonium chloride and extracted 3 x 50 mL EtOAc, dried over sodium sulfate, and concentrated *in vacuo* to quantitatively yield (*S*)-5-(5-((trimethylsilyl)oxy)nonan-5-yl)pyrrolidin-2-one as a colorless oil. To a flame-dried flask with magnetic stir bar was added crude (*S*)-5-(5-((trimethylsilyl)oxy)nonan-5-yl)pyrrolidin-2-one (1.46 g, 4.87 mmol, 1.0 equiv). The flask was then evacuated and back-filled with argon. Dichloromethane (25 mL) and trimethyloxonium tetrafluoroborate (720 mg, 4.87 mmol, 1.0 equiv) were then added via powder funnel. The heterogeneous mixture was stirred at room temperature until the reaction was homogeneous (about 6 hours). Pentafluorophenyl hydrazine (965 mg, 4.87

## Supporting Information

mmol, 1.0 equiv) was added in one portion and the mixture was stirred for 12 hours at which point dichloromethane was removed *in vacuo*. The resulting yellow oil was then dissolved in acetonitrile (25 mL) and trimethylorthoformate (6 mL). This solution was refluxed in an oil bath for 24 hours. After 24 hours the solvent was removed *in vacuo* and the desired product purified by column chromatography to yield triazolium salt (**5f**) (1.1 g, 39 %) as a red amorphous solid.  $R_f = 0.43$  (19:1  $\text{CH}_2\text{Cl}_2$ :MeOH)  $[\alpha]_D^{21} = 16.4$  ( $c = 0.010$  g/ml, acetone);  $^1\text{H-NMR}$  (400 MHz;  $\text{CDCl}_3$ ):  $\delta$  9.83 (s, 1H), 5.01 (dd,  $J = 8.6, 2.9$  Hz, 1H), 3.30-3.00 (m, 3H), 2.68 (d,  $J = 3.6$  Hz, 1H), 1.63-1.04 (m, 12H), 0.90 (dt,  $J = 14.9, 7.3$  Hz, 6H), 0.10--0.01 (m, 9H).  $^{13}\text{C-NMR}$  (101 MHz;  $\text{CDCl}_3$ ):  $\delta$  164.0, 143.4, 79.4, 68.9, 37.0, 36.4, 28.4, 25.7, 25.5, 23.2, 22.8, 21.9, 13.81, 13.75 **IR** (ATR, neat) 2958, 2873, 1525, 1065, 1001, 841  $\text{cm}^{-1}$ ; **LRMS** (ESI + APCI)  $m/z$   $[\text{M}+\text{H}]$  calcd 490.2, found 490.2

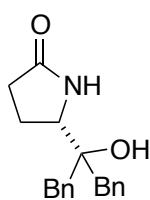

(*S*)-5-(2-hydroxy-1,3-diphenylpropan-2-yl)pyrrolidin-2-one (**S1**): To a flame dried dry 250 ml 3-neck round bottom flask containing a magnetic stirbar and fitted with a reflux condenser was added 1.9 g Magnesium turnings (80 mmols) followed by 15 mL dry THF. To this was added dropwise a solution of 9.5 mL benzyl bromide (80 mmols) in 55 mL dry THF with the use of an addition funnel at a rate sufficient to maintain reflux. After completion of the benzyl bromide addition the reaction was refluxed for 30 minutes. After 30 minutes the heat source was removed and the reaction was cooled to 0 °C in an ice bath. To this mixture was added a solution of 2.8 grams (20 mmols) (*S*)-methyl 5-oxopyrrolidine-2-carboxylate in 80 mL dry THF dropwise over 30 minutes. Upon completion of addition the reaction was allowed to warm to room temperature and stirred overnight. The reaction was cooled to 0 °C in an ice bath and quenched with 80 mL saturated  $\text{NH}_4\text{Cl}$ . The organic layer was separated and the aqueous layer was extracted 3 x 50 mL EtOAc. The organic layers were combined and washed 1 x 100 mL brine. The organic layer was dried over sodium sulfate and concentrated *in vacuo*. The resulting white solid was then triturated with hexanes to yield 2.5 grams (42 %) of the (*S*)-5-(2-hydroxy-1,3-diphenylpropan-2-yl)pyrrolidin-2-one as a white solid.  $[\alpha]_D^{21} = 52.4$  ( $c = 0.010$  g/ml,  $\text{CH}_2\text{Cl}_2$ );  $^1\text{H-NMR}$  (400 MHz;  $\text{CDCl}_3$ ):  $\delta$  7.34-7.21 (m, 8H), 7.15-7.12 (m, 2H), 6.26 (s, 1H), 3.62 (dd,  $J = 8.2, 6.1$  Hz, 1H), 2.97 (d,  $J = 13.6$  Hz, 1H), 2.75 (d,  $J = 1.3$  Hz, 2H), 2.67 (d,  $J = 13.6$  Hz, 1H), 2.43-2.28 (m, 2H), 2.21-2.12 (m, 1H), 2.11-2.01 (m, 1H);  $^{13}\text{C NMR}$  (101 MHz;  $\text{CDCl}_3$ ):  $\delta$  178.2, 135.99, 135.80, 130.8, 130.3, 128.53, 128.49, 126.91, 126.88, 75.4, 59.7, 42.3, 40.3, 30.2, 21.7. **IR** (ATR, neat) 3384, 3298, 1686, 700  $\text{cm}^{-1}$ ; **LRMS** (ESI + APCI)  $m/z$   $[\text{M}+\text{H}]$  calcd 296.2, found 296.1

Supporting Information

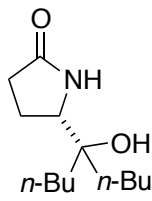

(*S*)-5-(5-hydroxynonan-5-yl)pyrrolidin-2-one (**S2**): To a solution of (*S*)-methyl 5-oxopyrrolidine-2-carboxylate (2.8 g, 20 mmol) in THF (60 ml) cooled to 0 °C was added 42.5 ml *n*-Butyl Lithium in hexanes (1.6 M, 68 mmol) dropwise. The solution was allowed to warm to room temperature slowly and stirred for 4 hours at room temp. After four hours the reaction was quenched with 60 ml saturated sodium bicarbonate. The THF was then removed via rotary evaporation and the solution was extracted 3x 50 ml EtOAc and dried over Na<sub>2</sub>SO<sub>4</sub>. The solvent was removed *in vacuo* to yield a white solid that was triturated with hexanes to yield the product as a white solid (1.15 g, 25 %). [ $\alpha$ ]<sub>D</sub><sup>21</sup> = -13.3 (c = 0.010 g/ml, CH<sub>2</sub>Cl<sub>2</sub>); <sup>1</sup>H-NMR (400 MHz; CDCl<sub>3</sub>):  $\delta$  6.68 (s, 1H), 3.67-3.64 (m, 1H), 2.38-2.22 (m, 2H), 2.05-1.98 (m, 2H), 1.47-1.41 (m, 3H), 1.32-1.16 (m, 9H), 0.90-0.87 (m, 6H); <sup>13</sup>C NMR (101 MHz; CDCl<sub>3</sub>):  $\delta$  74.8, 60.7, 36.2, 33.5, 25.6, 25.2, 23.32, 23.23, 21.2, 14.0. IR (ATR, neat) 3247, 2954, 2933, 2871, 1691, 1458, 1277 cm<sup>-1</sup>; LRMS (ESI + APCI) *m/z* [M+H] calcd 228.2, found 228.2

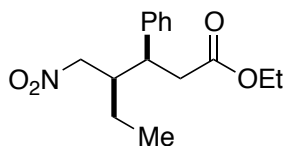

(3*S*,4*R*)-ethyl 4-(nitromethyl)-3-phenylhexanoate (**3a**): Colorless Oil. R<sub>f</sub> = 0.28 (8:2 Hexanes:Ether); 70 % yield, 17:1 d.r., 93 % ee; [ $\alpha$ ]<sub>D</sub><sup>21</sup> = -4.9 (c = 0.010 g/ml, CH<sub>2</sub>Cl<sub>2</sub>); HPLC analysis – Chiralpak IC column, 97:3 hexanes/*iso*-propanol, 1.0 mL/min. Major: 21.1 min, minor: 22.6 min. <sup>1</sup>H-NMR (400 MHz; CDCl<sub>3</sub>):  $\delta$  7.32-7.28 (m, 2H), 7.24 (d, *J* = 6.4 Hz, 1H), 7.17-7.15 (m, 2H), 4.31 (dd, *J* = 6.7, 2.1 Hz, 2H), 4.02-3.96 (m, 2H), 3.30 (q, *J* = 7.3 Hz, 1H), 2.72-2.70 (m, 2H), 2.45 (ddd, *J* = 8.5, 6.5, 4.5 Hz, 1H), 1.55-1.48 (m, 1H), 1.30-1.034 (m, 1H), 1.08 (t, *J* = 7.1 Hz, 3H), 0.91 (t, *J* = 7.4 Hz, 3H); <sup>13</sup>C NMR (101 MHz; CDCl<sub>3</sub>):  $\delta$  171.5, 139.8, 128.5, 128.3, 127.2, 76.8, 60.6, 43.7, 42.4, 37.4, 21.2, 14.0, 11.0. IR (ATR, neat) 2966, 2929, 2878, 1730, 1549, 1379, 1217, 702 cm<sup>-1</sup>; LRMS (ESI + APCI) *m/z* [M+H] calcd 280.2, found 280.1

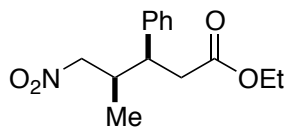

(3*S*,4*R*)-ethyl 4-methyl-5-nitro-3-phenylpentanoate (**3b**): R<sub>f</sub> = 0.21 (8:2 Hexanes:Ether); [ $\alpha$ ]<sub>D</sub><sup>21</sup> = -0.17 (c = 0.010 g/ml, CH<sub>2</sub>Cl<sub>2</sub>); HPLC analysis – Chiralpak IC column, 97:3 hexanes/*iso*-propanol, 1.0 mL/min. Major: 31.6 min, minor: 28.5 min. <sup>1</sup>H-NMR (400 MHz; CDCl<sub>3</sub>):  $\delta$  7.32-7.24 (m, 4H), 7.13 (d, *J* = 7.6 Hz, 3H), 4.36 (dd, *J* = 12.1, 6.1 Hz, 1H), 4.08-3.95 (m, 3H), 3.23 (q, *J* = 6.7 Hz, 1H), 2.73 (d, *J* = 7.7 Hz, 2H), 2.80-2.57 (d, *J* = 7.7 Hz, 4H), 1.10 (t, *J* = 7.1 Hz, 3H), 0.89 (d, *J* = 6.9 Hz, 3H); <sup>13</sup>C NMR (101 MHz; CDCl<sub>3</sub>):  $\delta$  171.4, 139.1, 128.51, 128.41, 127.3, 79.9, 60.6, 43.8, 37.9, 36.7, 14.0, 13.8. IR (ATR, neat) 2979, 2924, 1731, 1550, 1378, 1173, 1031, 702 cm<sup>-1</sup>; LRMS (ESI + APCI) *m/z* [M+H] calcd 266.1, found 266.1



Supporting Information

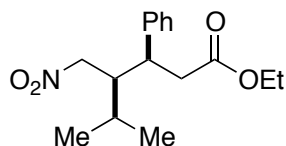

(3*S*,4*R*)-ethyl 5-methyl-4-(nitromethyl)-3-phenylhexanoate (**3c**): Colorless Oil.  $R_f = 0.29$  (8:2 Hexanes:Ether); 57 % yield, 20:1 d.r., 94 % ee;  $[\alpha]_D^{21} = -29.5$  ( $c = 0.010$  g/ml,  $\text{CH}_2\text{Cl}_2$ ); **HPLC analysis** – Chiralpak IC column, 97:3 hexanes/*iso*-propanol, 1.0 mL/min. Major: 18.9 min, minor: 16.1 min.  **$^1\text{H-NMR}$**  (400 MHz;  $\text{CDCl}_3$ ):  $\delta$  7.29 (t,  $J = 7.3$  Hz, 2H), 7.23-7.18 (m, 2H), 4.43-4.33 (m, 2H), 3.92 (q,  $J = 7.1$  Hz, 2H), 3.25 (td,  $J = 9.7, 5.1$  Hz, 1H), 2.69-2.58 (m, 2H), 2.56-2.50 (m, 1H), 1.66 (dtd,  $J = 13.8, 6.9, 3.5$  Hz, 1H), 1.02 (t,  $J = 7.1$  Hz, 3H), 0.93 (d,  $J = 6.9$  Hz, 3H), 0.68 (d,  $J = 6.9$  Hz, 3H);  **$^{13}\text{C NMR}$**  (101 MHz;  $\text{CDCl}_3$ ):  $\delta$  171.7, 141.2, 128.6, 127.8, 127.1, 75.1, 60.5, 47.5, 43.8, 38.4, 27.5, 21.4, 16.4, 13.9. **IR** (ATR, neat) 2959, 2926, 2856, 1732, 1552, 1378, 1163, 1032  $\text{cm}^{-1}$ ; **LRMS** (ESI + APCI)  $m/z$   $[\text{M}+\text{H}]$  calcd 294.2, found 294.1

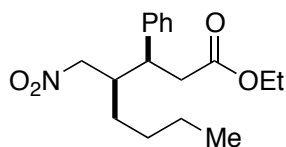

(3*S*,4*R*)-ethyl 4-(nitromethyl)-3-phenyloctanoate (**3d**): Colorless Oil.  $R_f = 0.26$  (8:2 Hexanes:Ether); 72 % yield, 20:1 d.r., 93 % ee;  $[\alpha]_D^{21} = -2.3$  ( $c = 0.010$  g/ml,  $\text{CH}_2\text{Cl}_2$ ); **HPLC analysis** – Chiralpak IC column, 97:3 hexanes/*iso*-propanol, 1.0 mL/min. Major: 15.1 min, minor: 16.2 min.  **$^1\text{H-NMR}$**  (400 MHz;  $\text{CDCl}_3$ ):  $\delta$  7.32-7.28 (m, 2H), 7.25-7.22 (m, 1H), 7.17-7.15 (m, 2H), 4.28 (d,  $J = 6.8$  Hz, 2H), 3.99 (qd,  $J = 7.1, 0.8$  Hz, 2H), 3.31 (td,  $J = 7.7, 5.8$  Hz, 1H), 2.71 (d,  $J = 7.8$  Hz, 2H), 2.51 (dq,  $J = 8.6, 6.3, 4.3$  Hz, 1H), 1.48-1.41 (m, 1H), 1.30-1.23 (m, 4H), 1.08 (t,  $J = 7.1$  Hz, 3H), 1.03 (dt,  $J = 9.3, 4.7$  Hz, 1H), 0.83 (t,  $J = 7.0$  Hz, 3H);  **$^{13}\text{C NMR}$**  (101 MHz;  $\text{CDCl}_3$ ):  $\delta$  171.5, 139.7, 128.50, 128.33, 127.2, 77.2, 60.6, 42.5, 42.0, 37.2, 28.7, 27.8, 22.5, 13.97, 13.81. **IR** (ATR, neat) 2958, 2931, 2871, 1731, 1550, 1379, 1163, 1032, 702  $\text{cm}^{-1}$ ; **LRMS** (ESI + APCI)  $m/z$   $[\text{M}+\text{H}]$  calcd 308.2, found 308.1

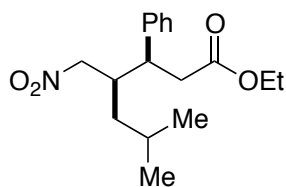

(3*S*,4*R*)-ethyl 6-methyl-4-(nitromethyl)-3-phenylheptanoate (**3e**): Colorless Oil.  $R_f = 0.24$  (8:2 Hexanes:Ether); 67 % yield, 20:1 d.r., 91 % ee;  $[\alpha]_D^{21} = 0.71$  ( $c = 0.010$  g/ml,  $\text{CH}_2\text{Cl}_2$ ); **HPLC analysis** – Chiralpak IC column, 97:3 hexanes/*iso*-propanol, 1.0 mL/min. Major: 12.3 min, minor: 15.0 min.  **$^1\text{H-NMR}$**  (400 MHz;  $\text{CDCl}_3$ ):  $\delta$  7.30 (tt,  $J = 7.3, 1.6$  Hz, 2H), 7.25-7.21 (m, 1H), 7.17-7.15 (m, 2H), 4.24-4.22 (dq, 2H), 4.03-3.98 (m, 2H), 3.34 (td,  $J = 7.8, 4.9$  Hz, 1H), 2.72-2.70 (m, 2H), 2.59 (dddd,  $J = 9.2, 6.8, 4.5, 2.1$  Hz, 1H), 1.59-1.50 (m, 1H), 1.26 (ddd,  $J = 14.0, 9.3, 4.6$  Hz, 1H), 1.10 (d,  $J = 14.3$  Hz, 3H), 0.95 (ddd,  $J = 14.3, 9.4, 5.0$  Hz, 1H), 0.88 (dd,  $J = 6.5, 2.2$  Hz, 6H);  **$^{13}\text{C NMR}$**  (101 MHz;  $\text{CDCl}_3$ ):  $\delta$  171.4, 139.4, 128.50, 128.45, 127.2, 77.3, 60.6, 42.4, 39.8, 37.1, 36.7, 25.2, 23.2, 21.7, 14.0. **IR** (ATR, neat) 2958, 2930, 2871, 1732, 1551, 1380, 1170, 738, 703  $\text{cm}^{-1}$ ; **LRMS** (ESI + APCI)  $m/z$   $[\text{M}+\text{H}]$  calcd 308.2, found 308.2

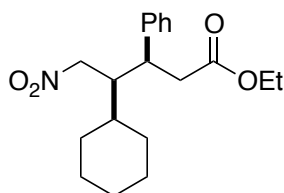

(3*S*,4*R*)-ethyl 4-cyclohexyl-5-nitro-3-phenylpentanoate (**3f**): Colorless Oil.  $R_f = 0.27$  (8:2 Hexanes:Ether); 59 % yield, 20:1 d.r. 96 % ee;  $[\alpha]_D^{21} = -8.9$  ( $c = 0.010$  g/ml,  $\text{CH}_2\text{Cl}_2$ ); **HPLC analysis** – Chiralpak IC column, 97:3 hexanes/*iso*-propanol, 1.0 mL/min. Major: 16.6 min, minor: 14.1 min.  **$^1\text{H-NMR}$**  (400 MHz;  $\text{CDCl}_3$ ):  $\delta$  7.29 (ddd,  $J = 8.0, 6.4, 1.3$  Hz, 2H), 7.24-7.17 (m, 3H), 4.38 (qd,  $J = 13.8, 5.7$  Hz, 2H), 3.96-3.91 (m, 2H), 3.36-3.30 (m, 1H), 2.68-2.57 (m, 2H), 2.51-2.45 (m, 1H), 1.69-0.86 (m, 11H), 1.08-0.99 (m, 3H);  **$^{13}\text{C NMR}$**  (101 MHz;  $\text{CDCl}_3$ ):  $\delta$  171.7, 141.2, 128.6, 127.8, 127.1, 75.7, 60.5, 47.4, 42.7, 38.0, 37.8, 31.8, 27.7, 26.4, 26.17, 26.16, 13.9. **IR** (ATR, neat) 2925, 2853, 1732, 1551, 1374, 1032  $\text{cm}^{-1}$ ; **LRMS** (ESI + APCI)  $m/z$   $[\text{M}+\text{H}]$  calcd 334.2, found 334.2

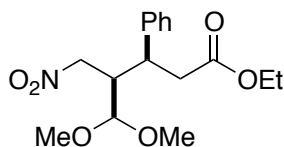

(3*S*,4*R*)-ethyl 5,5-dimethoxy-4-(nitromethyl)-3-phenylpentanoate (**3g**): Colorless Oil.  $R_f = 0.1$  (8:2 Hexanes:Ether); 49 % yield, 8:1 d.r., 79 % ee;  $[\alpha]_D^{21} = -22.1$  ( $c = 0.010$  g/ml,  $\text{CH}_2\text{Cl}_2$ ); **HPLC analysis** – Chiralpak IC column, 98:2 hexanes/*iso*-propanol, 1.0 mL/min. Major: 50.6 min, minor: 55.9 min.  **$^1\text{H-NMR}$**  (400 MHz;  $\text{CDCl}_3$ ):  $\delta$  7.33-7.19 (m, 5H), 4.69 (dd,  $J = 14.1, 5.0$  Hz, 1H), 4.31 (dd,  $J = 14.1, 6.3$  Hz, 1H), 3.98-3.91 (m, 2H), 3.81 (d,  $J = 4.0$  Hz, 1H), 3.35-3.33 (m, 1H), 3.23 (d,  $J = 6.0$  Hz, 6H), 2.96-2.91 (m, 1H), 2.71 (qd,  $J = 14.1, 7.8$  Hz, 2H), 1.04 (t,  $J = 7.1$  Hz, 3H);  **$^{13}\text{C NMR}$**  (101 MHz;  $\text{CDCl}_3$ ):  $\delta$  171.4, 144.1, 128.7, 128.0, 127.3, 73.7, 60.5, 55.7, 55.2, 45.0, 41.6, 38.1, 25.3, 13.9. **IR** (ATR, neat) 2923, 1733, 1557, 1065  $\text{cm}^{-1}$ ; **LRMS** (ESI + APCI)  $m/z$   $[\text{M}+\text{H}]$  calcd 362.2, found 362.2.

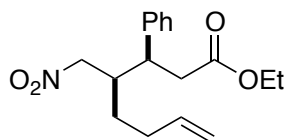

(3*S*,4*R*)-ethyl 4-(nitromethyl)-3-phenyloct-7-enoate (**3h**): Colorless Oil.  $R_f = 0.24$  (8:2 Hexanes:Ether) 72 % yield, 12:1 d.r., 89 % ee;  $[\alpha]_D^{21} = -3.4$  ( $c = 0.010$  g/ml,  $\text{CH}_2\text{Cl}_2$ ); **HPLC analysis** – Chiralpak IC column, 97:3 hexanes/*iso*-propanol, 1.0 mL/min. Major: 16.8 min, minor: 23.6 min.  **$^1\text{H-NMR}$**  (400 MHz;  $\text{CDCl}_3$ ):  $\delta$  7.30 (td,  $J = 7.2, 1.4$  Hz, 2H), 7.25-7.23 (m, 1H), 7.17-7.15 (m, 2H), 5.67 (ddt,  $J = 17.0, 10.3, 6.7$  Hz, 1H), 5.02-4.96 (m, 2H), 4.31-4.29 (m, 2H), 4.00 (q,  $J = 7.1$  Hz, 2H), 3.33 (td,  $J = 7.7, 5.8$  Hz, 1H), 2.71 (d,  $J = 7.7$  Hz, 2H), 2.57-2.52 (m, 1H), 2.12-1.99 (m, 2H), 1.56 (dddd,  $J = 12.0, 8.4, 6.2, 3.8$  Hz, 1H), 1.15 (dd,  $J = 14.2, 5.5$  Hz, 1H), 1.13-1.07 (m, 3H);  **$^{13}\text{C NMR}$**  (101 MHz;  $\text{CDCl}_3$ ):  $\delta$  171.4, 139.6, 137.0, 128.6, 128.3, 127.3, 115.9, 76.9, 60.6, 42.4, 41.3, 37.1, 30.7, 27.4, 14.0. **IR** (ATR, neat) 2978, 2927, 1732, 1551, 1379, 1162, 916  $\text{cm}^{-1}$ ; **LRMS** (ESI + APCI)  $m/z$   $[\text{M}+\text{H}]$  calcd 306.2, found 306.1

Supporting Information

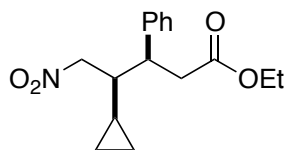

(3*S*,4*R*)-ethyl 4-cyclopropyl-5-nitro-3-phenylpentanoate (**3i**): Colorless Oil.  $R_f = 0.23$  (8:2 Hexanes:Ether); 68 % yield, 18:1 d.r., 88 % ee;  $[\alpha]_D^{21} = -37.5$  ( $c = 0.010$  g/ml,  $\text{CH}_2\text{Cl}_2$ ); **HPLC analysis** – Chiralpak IC column, 97:3 hexanes/*iso*-propanol, 1.0 mL/min. Major: 16.4 min, minor: 19.2 min.  **$^1\text{H-NMR}$**  (400 MHz;  $\text{CDCl}_3$ ):  $\delta$  7.33-7.29 (m, 2H), 7.26-7.20 (m, 3H), 4.31 (dd,  $J = 12.1, 7.9$  Hz, 1H), 4.24 (dd,  $J = 12.0, 6.7$  Hz, 1H), 4.06-3.98 (m, 2H), 3.39 (td,  $J = 8.0, 3.8$  Hz, 1H), 2.89 (d,  $J = 8.0$  Hz, 2H), 1.85-1.78 (m, 1H), 1.11 (d,  $J = 14.3$  Hz, 3H), 0.67 (tdd,  $J = 8.2, 5.7, 4.0$  Hz, 1H), 0.52-0.35 (m, 3H), 0.13-0.08 (m, 1H);  **$^{13}\text{C NMR}$**  (101 MHz;  $\text{CDCl}_3$ ):  $\delta$  171.6, 138.9, 128.7, 128.4, 127.3, 78.9, 60.5, 46.9, 43.6, 37.5, 14.0, 10.1, 5.3, 2.6. **IR** (ATR, neat) 2960, 2925, 1731, 1552, 1378, 1175, 1028, 740  $\text{cm}^{-1}$ ; LRMS (ESI + APCI)  $m/z$  [M+H] calcd 292.2, found 292.2

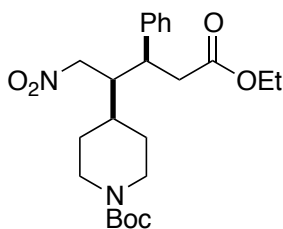

*tert*-butyl 4-((2*R*,3*S*)-5-ethoxy-1-nitro-5-oxo-3-phenylpentan-2-yl)piperidine-1-carboxylate (**3j**): Colorless Oil.  $R_f = 0.26$  (6:4 Hexanes:Ether); 65 % yield, 19:1 d.r., 94 % ee;  $[\alpha]_D^{21} = 9.11$  ( $c = 0.010$  g/ml,  $\text{CH}_2\text{Cl}_2$ ); **HPLC analysis** – Chiralpak IC column, 85:15 hexanes/*iso*-propanol, 1.0 mL/min. Major: 31.4 min, minor: 41.3 min.  **$^1\text{H-NMR}$**  (400 MHz;  $\text{CDCl}_3$ ):  $\delta$  7.32-7.29 (m, 2H), 7.22-7.22 (m, 1H), 7.20-7.17 (m, 2H), 4.37 (d,  $J = 5.7$  Hz, 2H), 4.04 (m, 2H), 3.95 (qd,  $J = 7.1, 0.9$  Hz, 2H), 3.36-3.30 (m, 1H), 2.65-2.63 (m, 2H), 2.55-2.51 (m, 2H), 2.39-2.31 (m, 1H), 1.56-1.31 (m, 5H), 1.39 (s, 9H), 1.04 (t,  $J = 7.1$  Hz, 3H);  **$^{13}\text{C NMR}$**  (101 MHz;  $\text{CDCl}_3$ ):  $\delta$  171.5, 154.5, 140.7, 128.8, 127.7, 127.3, 79.5, 75.3, 60.6, 46.6, 36.6, 28.4, 13.9. **IR** (ATR, neat) 2976, 2927, 2854, 1732, 1688, 1553, 1425, 1366, 1169, 766  $\text{cm}^{-1}$ ; LRMS (ESI + APCI)  $m/z$  [M+H] calcd 435.2, found 435.2

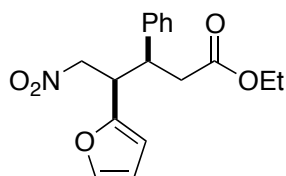

(3*S*,4*R*)-ethyl 4-(furan-2-yl)-5-nitro-3-phenylpentanoate (**3k**): Colorless Oil.  $R_f = 0.31$  (8:2 Hexanes:Ether); 90 % yield, 3:1 d.r., 81 % ee;  $[\alpha]_D^{21} = -1.9$  ( $c = 0.010$  g/ml,  $\text{CH}_2\text{Cl}_2$ ); **HPLC analysis** – Chiralpak IC column, 97:3 hexanes/*iso*-propanol, 1.0 mL/min. Major: 23.3 min, minor: 31.6 min.  **$^1\text{H-NMR}$** , isolated as a 2:1 mixture of diastereomers (400 MHz;  $\text{CDCl}_3$ ):  $\delta$  7.40-7.20 (m, 5H), 6.86 (dd,  $J = 6.7, 2.8$  Hz, 1H), 6.31-6.24 (m, 1H), 5.97 (d,  $J = 3.3$  Hz, 1H), 4.57-4.47 (m, 2H), 4.18 (dd,  $J = 12.7, 4.2$  Hz, 0.33H, minor diastereomer), 4.05 (qt,  $J = 7.2, 3.6$  Hz, 2.33H), 3.90-3.80 (m, 1H), 3.53 (td,  $J = 7.7, 4.8$  Hz, 0.66H, major diastereomer), 3.46 (td,  $J = 10.4, 5.0$  Hz, 0.33H, minor diastereomer), 2.85-2.66 (m, 1.32H, major diastereomer), 2.50 (qd,  $J =$

## Supporting Information

17.1, 7.4 Hz, 0.66H, minor diastereomer), 1.13 (t,  $J = 7.1$  Hz, 2H, major diastereomer), 1.01 (t,  $J = 7.1$  Hz, 1H, minor diastereomer);  $^{13}\text{C}$  NMR (101 MHz;  $\text{CDCl}_3$ ):  $\delta$  171.3, 171.1, 150.4, 150.0, 142.8, 142.2, 139.9, 138.4, 129.1, 127.81, 127.72, 127.5, 110.38, 110.36, 109.5, 108.7, 77.1, 75.8, 60.7, 60.4, 43.7, 43.37, 43.34, 41.6, 39.5, 37.8, 14.03, 13.91. IR (ATR, neat) 2981, 2923, 1729, 1553, 1376, 1162, 702  $\text{cm}^{-1}$ ; LRMS (ESI + APCI)  $m/z$  [M+H] calcd 318.1, found 318.1

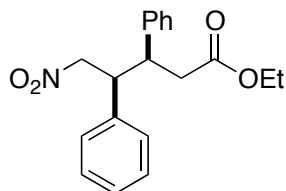

(3*S*,4*S*)-ethyl 5-nitro-3,4-diphenylpentanoate (**3l**): White Solid.  $R_f = 0.26$  (8:2 Hexanes:Ether); 95 % yield, 6:1 d.r., 87 % ee;  $[\alpha]_{\text{D}}^{21} = -26.8$  ( $c = 0.010$  g/ml,  $\text{CH}_2\text{Cl}_2$ ); **HPLC analysis** – Chiralcel OD-H column, 98:2 hexanes/*iso*-propanol, 1.0 mL/min. Major: 43.0 min, minor: 54.6 min.  $^1\text{H-NMR}$  (400 MHz;  $\text{CDCl}_3$ ):  $\delta$  7.38-7.28 (m, 1H), 7.24-7.17 (m, 5H), 6.84-6.79 (m, 4H), 4.65 (ddd,  $J = 56.8, 12.8, 7.8$  Hz, 2H), 4.04 (qt,  $J = 7.1, 3.5$  Hz, 2H), 3.88 (ddd,  $J = 8.6, 7.0, 5.7$  Hz, 1H), 3.55 (td,  $J = 7.7, 5.6$  Hz, 1H), 2.75-2.57 (m, 2H), 1.12 (t,  $J = 7.1$  Hz, 3H);  $^{13}\text{C}$  NMR (101 MHz;  $\text{CDCl}_3$ ):  $\delta$  171.4, 138.4, 135.7, 128.90, 128.82, 128.22, 128.11, 127.8, 127.4, 77.9, 60.7, 47.8, 44.0, 37.9, 14.0. IR (ATR, neat) 2958, 2924, 2854, 1728, 1551, 1377, 1156, 1029  $\text{cm}^{-1}$ ; LRMS (ESI + APCI)  $m/z$  [M+H] calcd 328.2, found 328.1

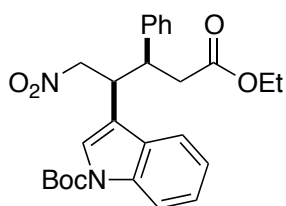

*tert*-butyl 3-((2*S*,3*S*)-5-ethoxy-1-nitro-5-oxo-3-phenylpentan-2-yl)-1*H*-indole-1-carboxylate (**3m**): Colorless Oil.  $R_f = 0.61$  (6:4 Hexanes:Ether) 86 % yield, 8:1 d.r., 87 % ee;  $[\alpha]_{\text{D}}^{21} = 12.7$  ( $c = 0.010$  g/ml,  $\text{CH}_2\text{Cl}_2$ ); **HPLC analysis** – Chiralpak IC column, 96:4 hexanes/*iso*-propanol, 1.0 mL/min. Major: 30.73 min, minor: 31.44 min.  $^1\text{H-NMR}$  (400 MHz;  $\text{CDCl}_3$ ):  $\delta$  8.09 (ddd,  $J = 8.4, 1.6, 0.6$  Hz, 1H), 7.41-7.19 (m, 6H), 7.01 (dd,  $J = 6.5, 3.0$  Hz, 2H), 6.89-6.88 (m, 1H), 4.71 (dd,  $J = 12.9, 7.2$  Hz, 1H), 4.52 (dd,  $J = 12.9, 8.4$  Hz, 1H), 4.30-4.25 (m, 1H), 4.07-3.97 (m, 2H), 3.72 (td,  $J = 7.7, 4.8$  Hz, 1H), 2.77-2.59 (m, 2H), 1.61 (s, 9H), 1.10 (t,  $J = 7.1$  Hz, 3H);  $^{13}\text{C}$  NMR (101 MHz;  $\text{CDCl}_3$ ):  $\delta$  171.5, 138.7, 129.9, 128.7, 128.3, 127.6, 124.7, 124.5, 122.7, 118.9, 115.28, 115.15, 84.0, 60.6, 43.1, 39.1, 37.2, 28.1, 14.0. IR (ATR, neat) 2924, 2853, 1731, 1553, 1452, 1153  $\text{cm}^{-1}$ ; LRMS (ESI + APCI)  $m/z$  [M+H] calcd 466.5, found 466.4

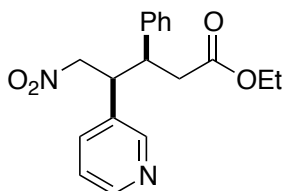

(3*S*,4*S*)-ethyl 5-nitro-3-phenyl-4-(pyridin-3-yl)pentanoate (**3n**): Colorless Oil.  $R_f = 0.12$  (6:4 Hexanes:Ether) 73 % yield, 5:1 d.r., 86 % ee;  $[\alpha]_{\text{D}}^{21} = -24.9$

## Supporting Information

(*c* = 0.010 g/ml, CH<sub>2</sub>Cl<sub>2</sub>); **HPLC analysis** – Chiracel OD-H column, 80:20hexanes/*iso*-propanol, 1.0 mL/min. Major: 27.5 min, minor: 20.7 min. **<sup>1</sup>H-NMR** (400 MHz; CDCl<sub>3</sub>): δ 8.47 (s, 1H), 8.17 (s, 1H), 7.24-7.07 (m, 5H), 6.81 (td, *J* = 3.9, 1.6 Hz, 2H), 4.79 (dd, *J* = 13.0, 6.6 Hz, 1H), 4.59 (dd, *J* = 13.0, 9.1 Hz, 1H), 4.11-4.03 (m, 2H), 3.95-3.89 (m, 1H), 3.59-3.53 (m, 1H), 2.67 (qd, *J* = 18.0, 7.6 Hz, 2H), 1.14 (t, *J* = 7.1 Hz, 3H); **<sup>13</sup>C NMR** (101 MHz; CDCl<sub>3</sub>): δ 171.1, 149.9, 148.9, 137.8, 136.4, 128.57, 128.50, 127.8, 123.1, 77.5, 60.9, 45.6, 43.9, 37.9, 14.0. **IR** (ATR, neat) 2980, 2924, 1729, 1553, 1378, 1160, 1026 cm<sup>-1</sup>; **LRMS** (ESI + APCI) *m/z* [M+H] calcd 329.2, found 329.1

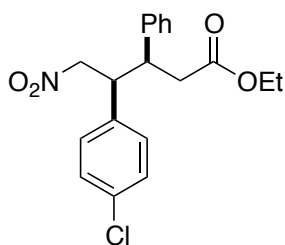

(3*S*,4*S*)-ethyl 4-(4-chlorophenyl)-5-nitro-3-phenylpentanoate (**3o**): White Solid. *R<sub>f</sub>* = 0.62 (6:4 Hexanes:Ether) 75 % yield, 4:1 d.r., 86 % ee; [ $\alpha$ ]<sub>D</sub><sup>21</sup> = -49.2 (*c* = 0.010 g/ml, CH<sub>2</sub>Cl<sub>2</sub>); **HPLC analysis** – Chiralpak IC column, 90:10 hexanes/*iso*-propanol, 1.0 mL/min. Major: 12.7 min, minor: 20.8 min. **<sup>1</sup>H-NMR** (400 MHz; CDCl<sub>3</sub>): δ 7.24-7.16 (m, 4H), 6.84-6.81 (m, 2H), 6.76-6.74 (m, 2H), 4.71 (dd, *J* = 12.9, 6.6 Hz, 1H), 4.53 (dd, *J* = 12.8, 9.1 Hz, 1H), 4.05 (qd, *J* = 7.1, 2.1 Hz, 2H), 3.86 (dt, *J* = 9.0, 6.2 Hz, 1H), 3.54-3.49 (m, 1H), 2.72-2.57 (m, 2H), 1.13 (t, *J* = 7.1 Hz, 3H); **<sup>13</sup>C NMR** (101 MHz; CDCl<sub>3</sub>): δ 171.3, 138.2, 134.2, 133.7, 130.2, 128.7, 128.45, 128.28, 127.5, 77.8, 60.8, 47.3, 44.0, 37.9, 14.0. **IR** (ATR, neat) 2981, 2924, 1728, 1552, 1493, 1377, 1014, 828 cm<sup>-1</sup>; **LRMS** (ESI + APCI) *m/z* [M+H] calcd 362.1, found 362.2

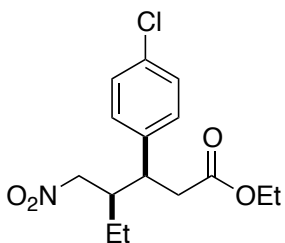

(3*S*,4*R*)-ethyl 3-(4-chlorophenyl)-4-(nitromethyl)hexanoate (**3p**): Colorless Oil. *R<sub>f</sub>* = 0.58 (6:4 Hexanes:Ether) 73 % yield, 20:1 d.r., 82 % ee; [ $\alpha$ ]<sub>D</sub><sup>21</sup> = -2.3 (*c* = 0.010 g/ml, CH<sub>2</sub>Cl<sub>2</sub>); Could not separate via HPLC, ee inferred from lactam **6e**. **<sup>1</sup>H-NMR** (400 MHz; CDCl<sub>3</sub>): δ 7.28 (d, *J* = 8.5 Hz, 2H), 7.11 (d, *J* = 8.4 Hz, 2H), 4.30 (qd, *J* = 14.1, 6.6 Hz, 2H), 3.99 (qd, *J* = 7.1, 1.0 Hz, 2H), 3.27 (dt, *J* = 8.9, 6.4 Hz, 1H), 2.68 (dd, *J* = 7.7, 3.9 Hz, 2H), 2.42 (tdd, *J* = 8.7, 4.4, 1.9 Hz, 1H), 1.49 (ddd, *J* = 14.3, 7.4, 4.3 Hz, 1H), 1.12-1.00 (m, 1H), 1.10 (t, *J* = 7.1 Hz, 3H), 0.91 (t, *J* = 7.3 Hz, 3H); **<sup>13</sup>C NMR** (101 MHz; CDCl<sub>3</sub>): δ 171.2, 138.4, 133.0, 129.6, 128.7, 76.6, 60.7, 43.6, 42.0, 37.4, 21.2, 14.0, 11.0. **IR** (ATR, neat) 2966, 2925, 1731, 1549, 1162, 830 cm<sup>-1</sup>; **LRMS** (ESI + APCI) *m/z* [M+H] calcd 314.1, found 314.1

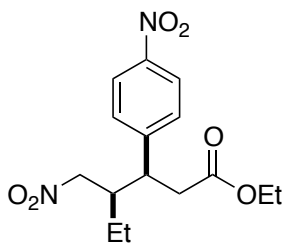

(3*S*,4*R*)-ethyl 4-(nitromethyl)-3-(4-nitrophenyl)hexanoate (**3q**): Yellow Solid.  $R_f = 0.48$  (6:4 Hexanes:Ether) 48 % yield, 10:1 d.r., 90 % ee;  $[\alpha]_D^{21} = -9.5$  ( $c = 0.010$  g/ml,  $\text{CH}_2\text{Cl}_2$ ); **HPLC analysis** – Chiralpak IC column, 90:10 hexanes/*iso*-propanol, 1.0 mL/min. Major: 32.9 min, minor: 36.5 min.  **$^1\text{H-NMR}$**  (400 MHz;  $\text{CDCl}_3$ ):  $\delta$  8.18 (d,  $J = 8.8$  Hz, 2H), 7.37 (d,  $J = 8.7$  Hz, 2H), 4.42-4.27 (m, 2H), 3.99 (qd,  $J = 7.1$ , 2.8 Hz, 2H), 3.41 (dt,  $J = 9.0$ , 6.5 Hz, 1H), 2.75 (dd,  $J = 7.6$ , 3.7 Hz, 2H), 2.53-2.45 (m, 1H), 1.48 (ddd,  $J = 14.3$ , 7.4, 4.3 Hz, 1H), 1.10 (t,  $J = 7.1$  Hz, 3H), 1.10-0.98 (m, 1H), 0.93 (t,  $J = 7.3$  Hz, 3H);  **$^{13}\text{C NMR}$**  (101 MHz;  $\text{CDCl}_3$ ):  $\delta$  170.7, 147.8, 129.2, 123.8, 98.7, 76.2, 60.9, 43.5, 42.5, 37.2, 21.5, 14.0, 10.9. **IR** (ATR, neat) 2973, 2937, 1731, 1552, 1521, 1347  $\text{cm}^{-1}$ ; **LRMS** (ESI + APCI)  $m/z$   $[\text{M}+\text{H}]$  calcd 325.1, found 325.1

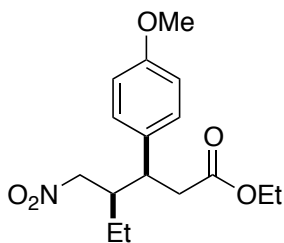

(3*S*,4*R*)-ethyl 3-(4-methoxyphenyl)-4-(nitromethyl)hexanoate (**3r**): White Solid.  $R_f = 0.27$  (7:3 Hexanes:Ether); 35 % yield, 5:1 d.r., 88 % ee;  $[\alpha]_D^{21} = -3.9$  ( $c = 0.010$  g/ml,  $\text{CH}_2\text{Cl}_2$ ); **HPLC Analysis** – Chiralpak IC column, 98:2 hexanes/*iso*-propanol, 1.0 mL/min. Major: 43.6 min, minor: 48.8 min.  **$^1\text{H-NMR}$**  (400 MHz;  $\text{CDCl}_3$ ):  $\delta$  7.08 (d,  $J = 8.3$  Hz, 2H), 6.83 (d,  $J = 8.0$  Hz, 2H), 4.30-4.28 (m, 2H), 4.00 (q,  $J = 7.1$  Hz, 2H), 3.77 (d,  $J = 0.9$  Hz, 3H), 3.28-3.22 (m, 1H), 2.68-2.66 (m, 2H), 2.43-2.38 (m, 1H), 1.30-1.21 (m, 2H), 1.10 (td,  $J = 7.1$ , 1.0 Hz, 3H), 1.16-1.02 (m, 2H), 0.91 (t,  $J = 7.4$  Hz, 3H);  **$^{13}\text{C NMR}$**  (101 MHz;  $\text{CDCl}_3$ ):  $\delta$  171.5, 131.6, 129.3, 114.1, 113.9, 76.9, 60.5, 55.2, 43.8, 41.7, 37.6, 21.0, 14.0, 11.1. **IR** (ATR, neat) 2959, 2924, 2854, 1732, 1551, 1513, 1250, 1035  $\text{cm}^{-1}$ ; **LRMS** (ESI + APCI)  $m/z$   $[\text{M}+\text{H}]$  calcd 310.2, found 310.2

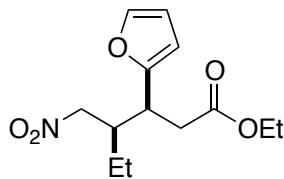

(3*S*,4*R*)-ethyl 3-(furan-2-yl)-4-(nitromethyl)hexanoate (**3s**): Colorless Oil.  $R_f = 0.22$  (8:2 Hexanes:Ether); 83 % yield, 19:1 d.r., 91 % ee;  $[\alpha]_D^{21} = 11.3$  ( $c = 0.010$  g/ml,  $\text{CH}_2\text{Cl}_2$ ); Could not separate via HPLC, ee inferred from lactam **6c**.  **$^1\text{H-NMR}$**  (400 MHz;  $\text{CDCl}_3$ ):  $\delta$  7.32 (ddd,  $J = 4.0$ , 2.0, 0.8 Hz, 1H), 6.27 (td,  $J = 3.7$ , 1.8 Hz, 1H), 6.11-6.09 (m, 1H), 4.34 (qd,  $J = 12.7$ , 6.9 Hz, 2H), 4.08 (q,  $J = 7.1$  Hz, 2H), 3.47 (td,  $J = 6.0$ , 3.1 Hz, 1H), 2.74-2.58 (m, 2H), 2.51-2.46 (m, 1H), 1.54 (ddd,  $J = 14.4$ , 7.5, 5.2 Hz, 1H), 1.18 (t,  $J = 7.1$  Hz, 3H), 1.20-1.07 (m, 1H), 0.93 (t,  $J = 7.4$  Hz, 3H);  **$^{13}\text{C NMR}$**  (101 MHz;  $\text{CDCl}_3$ ):  $\delta$  171.2, 153.5, 141.9, 110.1, 107.3, 77.4, 60.8, 42.4, 36.2,

## Supporting Information

35.2, 21.2, 14.1, 11.6. **IR** (ATR, neat) 2966, 2928, 1731, 1550, 1374, 1162, 1011, 808  $\text{cm}^{-1}$ ; **LRMS** (ESI + APCI)  $m/z$   $[M+H]$  calcd 270.1, found 270.1

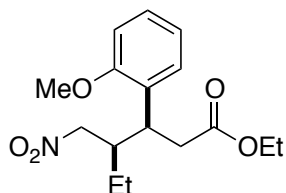

(3*S*,4*R*)-ethyl 3-(2-methoxyphenyl)-4-(nitromethyl) (**3t**): White Solid.  $R_f=0.29$  (8:2 Hexanes:Ether); % yield, 9:1 d.r., 82 % ee;  $[\alpha]_D^{21} = -15.7$  ( $c = 0.010$  g/ml,  $\text{CH}_2\text{Cl}_2$ ); **HPLC analysis** – Chiralpak IC column, 97:3 hexanes/*iso*-propanol, 1.0 mL/min. Major: 24.1 min, minor: 30.8 min. **<sup>1</sup>H-NMR** (400 MHz;  $\text{CDCl}_3$ ):  $\delta$  7.22-7.18 (m, 1H), 7.06 (dd,  $J = 7.6, 1.6$  Hz, 1H), 6.90-6.84 (m, 2H), 4.29 (qd,  $J = 13.8, 6.7$  Hz, 2H), 3.99 (qd,  $J = 7.1, 2.6$  Hz, 2H), 3.79 (s, 3H), 3.81-3.76 (m, 1H), 2.76-2.65 (m, 2H), 2.63-2.55 (m, 1H), 1.53-1.41 (m, 1H), 1.16-1.04 (m, 1H), 1.08 (t,  $J = 7.1$  Hz, 3H), 0.91 (t,  $J = 7.4$  Hz, 3H); **<sup>13</sup>C NMR** (101 MHz;  $\text{CDCl}_3$ ):  $\delta$  171.9, 157.2, 128.53, 128.36, 128.1, 120.3, 110.7, 76.9, 60.4, 55.2, 41.9, 36.1, 35.9, 21.6, 14.0, 10.9. **IR** (ATR, neat) 2964, 2925, 1731, 1550, 1492, 1242, 1028, 756  $\text{cm}^{-1}$ ; **LRMS** (ESI + APCI)  $m/z$   $[M+H]$  calcd 310.2, found 310.2

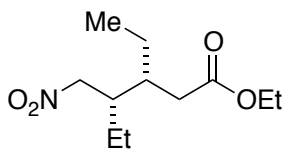

(3*R*,4*S*)-ethyl 3-ethyl-4-(nitromethyl)hexanoate (**3u**): Synthesized by a modified procedure: To a screw cap vial charged with a stirbar was added triazolium salt **6d** (10.5 mg, 0.025 mmol) and NaOAc (10 mg, .125 mmol). This vial was then fitted with a rubber septum and evacuated and refilled with argon three times. 0.75 ml EtOH was then added via syringe. To this solution was then added (*E*)-1-nitrobut-1-ene (26  $\mu\text{L}$ , 0.25 mmol, 1 equiv) followed by *trans*-2-pentenal (31.5 mg, 1.5 equiv). The septum was then quickly removed and replaced with a screw cap. This was then allowed to stir at 50  $^\circ\text{C}$  for 12 hours. After 12 hours the reaction was concentrated via rotary evaporation and then purified by silica gel chromatography (8:2 hexanes:ether) to yield 15 mg (25 %) (3*R*,4*S*)-ethyl 3-ethyl-4-(nitromethyl)hexanoate as a colorless oil.  $R_f= 0.21$  in (8:2 Hexanes:Ether); 25 % yield, 20:1 d.r., 91 % ee;  $[\alpha]_D^{21} = -3.3$  ( $c = 0.010$  g/ml,  $\text{CH}_2\text{Cl}_2$ ); **GC Analysis** – Varian BDM column, 130  $^\circ\text{C}$ , 1mL/min. Major: 39.237 min, minor: 39.836 min. **<sup>1</sup>H-NMR** (400 MHz;  $\text{CDCl}_3$ ):  $\delta$  4.35 (dd,  $J = 12.0, 6.2$  Hz, 1H), 4.24 (dd,  $J = 12.0, 7.7$  Hz, 1H), 4.12 (q,  $J = 7.1$  Hz, 2H), 2.30-2.26 (m, 1H), 2.28-2.14 (m, 2H), 2.03-1.97 (m, 1H), 1.46-1.41 (m, 1H), 1.37-1.27 (m, 3H), 1.27-1.23 (m, 3H), 0.96-0.92 (m, 6H); **<sup>13</sup>C NMR** (101 MHz;  $\text{CDCl}_3$ ):  $\delta$  172.7, 77.2, 60.6, 41.3, 37.3, 35.5, 23.8, 21.6, 14.1, 11.8, 11.6. **IR** (ATR, neat) 2963, 2927, 2877, 1733, 1553, 1463, 1377, 1181, 1034  $\text{cm}^{-1}$ ; **LRMS** (ESI + APCI)  $m/z$   $[M+H]$  calcd 232.2, found 232.0

## Supporting Information

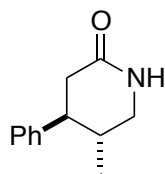

Me (4*S*,5*R*)-5-ethyl-4-phenylpiperidin-2-one (**6a**): White Solid.  $R_f = 0.18$  (100 % EtOAc) 63 % yield, 17:1 d.r., 93 % ee;  $[\alpha]_D^{21} = 30.0$  ( $c = 0.010$  g/ml,  $\text{CH}_2\text{Cl}_2$ ); **HPLC analysis** – Chiralpak IC column, 80:20 hexanes/*iso*-propanol, 1.0 mL/min. Major: 37.9 min, minor: 40.3 min.  **$^1\text{H-NMR}$**  (400 MHz;  $\text{CDCl}_3$ ):  $\delta$  7.31 (qd,  $J = 5.6, 2.2$  Hz, 2H), 7.25-7.20 (m, 1H), 7.15-7.12 (m,  $J = 8.1$  Hz, 2H), 6.62 (s, 1H), 3.47 (ddd,  $J = 12.1, 5.0, 3.8$  Hz, 1H), 3.04 (t,  $J = 11.1$  Hz, 1H), 2.76 (td,  $J = 10.8, 5.5$  Hz, 1H), 2.62 (dd,  $J = 17.8, 5.5$  Hz, 1H), 2.49 (dd,  $J = 17.8, 11.1$  Hz, 1H), 1.96-1.87 (m, 1H), 1.29 (dtd,  $J = 14.3, 7.3, 3.7$  Hz, 1H), 1.02 (ddt,  $J = 14.2, 9.3, 7.2$  Hz, 1H), 0.77 (t,  $J = 7.5$  Hz, 3H);  **$^{13}\text{C NMR}$**  (101 MHz;  $\text{CDCl}_3$ ):  $\delta$  172.2, 142.7, 128.8, 127.4, 126.8, 46.2, 44.5, 39.9, 39.0, 24.0, 11.0. **IR** (ATR, neat) 2960, 2930, 1678, 1495, 701  $\text{cm}^{-1}$ ; **LRMS** (ESI + APCI)  $m/z$  [M+H] calcd 232.2, found 232.1

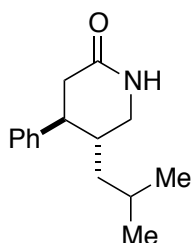

Me Me (4*S*,5*R*)-5-isobutyl-4-phenylpiperidin-2-one (**6b**): White Solid.  $R_f = 0.34$  (19:1 EtOAc:MeOH) 65 % yield, 19:1 d.r., 93 % ee;  $[\alpha]_D^{21} = 55.1$  ( $c = 0.010$  g/ml,  $\text{CH}_2\text{Cl}_2$ ); **HPLC analysis** – Chiralpak IC column, 80:20 hexanes/*iso*-propanol, 1.0 mL/min. Major: 31.6 min, minor: 33.8 min.  **$^1\text{H-NMR}$**  (400 MHz;  $\text{CDCl}_3$ ):  $\delta$  7.34-7.30 (m, 2H), 7.26-7.22 (m, 1H), 7.14-7.12 (m, 2H), 6.01 (s, 1H), 3.46 (ddd,  $J = 12.1, 4.8, 3.8$  Hz, 1H), 3.03-2.97 (m, 1H), 2.74 (td,  $J = 10.5, 5.5$  Hz, 1H), 2.67-2.62 (m, 1H), 2.51 (dd,  $J = 17.8, 10.8$  Hz, 1H), 2.10-2.01 (m, 1H), 1.50-1.40 (m, 1H), 1.01-0.98 (m, 2H), 0.77 (dd,  $J = 6.5, 3.2$  Hz, 6H);  **$^{13}\text{C NMR}$**  (101 MHz;  $\text{CDCl}_3$ ):  $\delta$  172.1, 142.8, 128.8, 127.3, 126.8, 46.7, 45.1, 40.6, 38.9, 36.1, 25.0, 23.7, 21.1. **IR** (ATR, neat) 3210, 2955, 2924, 1669, 1495, 1348, 758  $\text{cm}^{-1}$ ; **LRMS** (ESI + APCI)  $m/z$  [M+H] calcd 310.2, found 310.2

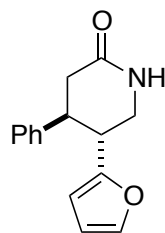

(4*S*,5*R*)-5-(furan-2-yl)-4-phenylpiperidin-2-one (**6c**): White Solid.  $R_f = 0.42$  (19:1 EtOAc:MeOH) 82 % yield, 3:1 d.r., 82 % ee;  $[\alpha]_D^{21} = 50.6$  ( $c = 0.010$  g/ml,  $\text{CH}_2\text{Cl}_2$ ); **HPLC analysis** – Chiralpak IC column, 85:15 hexanes/*iso*-propanol, 1.0 mL/min. Major: 42.5 min, minor: 46.1 min.  **$^1\text{H-NMR}$**  (400 MHz;  $\text{CDCl}_3$ ):  $\delta$  7.31-7.11 (m, 6H), 6.22 (s, 1H), 6.12 (s, 1H), 5.87 (s, 1H), 3.60-3.51 (m, 2H), 3.45-3.32 (m, 2H), 2.82-2.60 (m, 2H);  **$^{13}\text{C NMR}$**  (101 MHz;  $\text{CDCl}_3$ ):  $\delta$  171.4, 153.1, 141.8, 141.4, 128.6,



## Supporting Information

127.01, 126.90, 110.0, 106.9, 45.2, 42.9, 39.6, 38.0 **IR** (ATR, neat) 3206, 2923, 2854, 1669, 1495, 1011, 760  $\text{cm}^{-1}$ ; **LRMS** (ESI + APCI)  $m/z$  [M+H] calcd 242.1, found 242.1

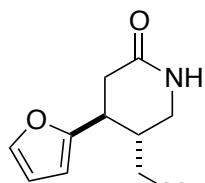

**(4S,5R)-5-ethyl-4-(furan-2-yl)piperidin-2-one (6d)**: White Solid.  $R_f$  = 0.44 (19:1 EtOAc:MeOH) 60 % yield, 19:1 d.r., 91 % ee  $[\alpha]_D^{21} = 3.0$  ( $c = 0.010$  g/ml,  $\text{CH}_2\text{Cl}_2$ ); **GC Analysis** – Varian BDM column, 170 °C, 1mL/min. Major: 16.453 min, minor: 16.594 min.  **$^1\text{H-NMR}$**  (400 MHz;  $\text{CDCl}_3$ ):  $\delta$  7.33 (d,  $J = 1.6$  Hz, 1H), 6.30 (dd,  $J = 3.1, 1.9$  Hz, 1H), 6.06 (dd,  $J = 9.3, 5.8$  Hz, 1H), 3.41-3.37 (m, 1H), 3.06-2.93 (m, 2H), 2.63 (dt,  $J = 7.0, 3.6$  Hz, 2H), 2.03-1.94 (m, 1H), 1.43-1.34 (m, 1H), 1.28-1.18 (m, 1H), 0.84 (t,  $J = 7.5$  Hz, 3H);  **$^{13}\text{C NMR}$**  (101 MHz;  $\text{CDCl}_3$ ):  $\delta$  171.3, 155.5, 141.5, 110.1, 105.9, 45.5, 44.3, 38.7, 37.5, 24.0, 11.1 **IR** (ATR, neat) 3102, 2962, 2924, 1667, 1495, 1014  $\text{cm}^{-1}$ ; **LRMS** (ESI + APCI)  $m/z$  [M+H] calcd 194.1, found 194.1

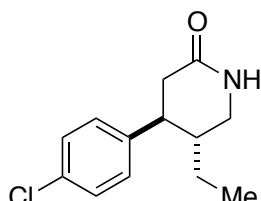

**(4S,5R)-4-(4-chlorophenyl)-5-ethylpiperidin-2-one (6e)**: White Solid.  $R_f$  = 0.31 (19:1 EtOAc:MeOH) 70 % yield, 20:1 d.r., 82 % ee;  $[\alpha]_D^{21} = 28.3$  ( $c = 0.010$  g/ml,  $\text{CH}_2\text{Cl}_2$ ); **HPLC analysis** – Chiralpak IC column, 85:15 hexanes/*iso*-propanol, 1.0 mL/min. Major: 50.9 min, minor: 54.3 min.  **$^1\text{H-NMR}$**  (400 MHz;  $\text{CDCl}_3$ ):  $\delta$  7.30-7.28 (m, 2H), 7.09-7.07 (m, 2H), 6.15 (s, 1H), 3.50-3.44 (m, 1H), 3.05 (t,  $J = 11.1$  Hz, 1H), 2.79-2.72 (m, 1H), 2.61 (dd,  $J = 17.8, 5.5$  Hz, 1H), 2.45 (dd,  $J = 17.8, 11.2$  Hz, 1H), 1.93-1.84 (m, 1H), 1.35-1.24 (m, 1H), 1.09-1.00 (m, 1H), 0.78 (t,  $J = 7.5$  Hz, 3H);  **$^{13}\text{C NMR}$**  (101 MHz;  $\text{CDCl}_3$ ):  $\delta$  171.8, 141.1, 132.6, 129.0, 128.7, 46.1, 43.9, 39.8, 38.8, 23.9, 11.0. **IR** (ATR, neat) 3212, 2960, 2928, 2874, 1668, 1491, 1089, 837, 818  $\text{cm}^{-1}$ ; **LRMS** (ESI + APCI)  $m/z$  [M+H] calcd 238.1, found 238.1

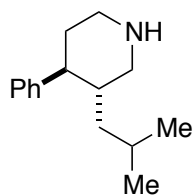

**(3R,4S)-3-isobutyl-4-phenylpiperidine (7a)**: To a flame dried 10 ml round bottom containing a stir bar, 46 mg **6b** (0.2 mmol, 1 equiv.) was dissolved in 6 ml dry THF and cooled to 0 °C in an ice bath. Then 11.3 mg Lithium aluminum hydride (0.3 mmol, 1.5 equiv.) was added in two portions over 5 minutes. This was stoppered with septum and placed under argon and allowed to stir for 1 hour. After 1 hour the ice bath was removed and the flask was fitted with a condenser and the reaction was refluxed for 4 hours. After 4 hours the heat source was removed and the flask was cooled to 0 °C in an ice bath and quenched with 2 ml 1 M HCl. This solution was then transferred to

## Supporting Information

a separatory funnel and diluted with 15 ml brine and extracted 3x 15 ml DCM. The organic layer was dried over sodium sulfate and the solvent was removed via rotary evaporation to yield 38 mg (89 %) (3*R*,4*S*)-3-isobutyl-4-phenylpiperidine as a colorless oil.  $R_f = 0.12$  (19:1 EtOAc:MeOH) 89 % yield, >20:1 d.r., 93 % ee;  $[\alpha]_D^{21} = 35.5$  (c = 0.010 g/ml, CH<sub>2</sub>Cl<sub>2</sub>); **HPLC Analysis** - Chiralpak IC column, 60:40 hexanes/*iso*-propanol, 1.0 mL/min. Major: 35.38 min, minor: 33.76 min. **<sup>1</sup>H-NMR** (400 MHz; CDCl<sub>3</sub>):  $\delta$  9.76-9.63 (m, 1H), 7.30 (t,  $J = 7.3$  Hz, 2H), 7.23-7.18 (m, 3H), 3.65-3.56 (m, 2H), 2.96-2.88 (m, 1H), 2.59-2.56 (m, 1H), 2.40-2.23 (m, 3H), 1.95 (d,  $J = 14.2$  Hz, 1H), 1.47-1.38 (m, 1H), 0.93 (ddd,  $J = 14.4, 9.9, 4.2$  Hz, 2H), 0.72 (d,  $J = 13.6$  Hz, 6H); **<sup>13</sup>C NMR** (101 MHz; CDCl<sub>3</sub>):  $\delta$  142.4, 128.7, 127.6, 127.0, 48.7, 47.8, 44.4, 40.5, 36.0, 31.0, 24.7, 23.7, 21.1 **IR** (ATR, neat) 3352, 2955, 2925, 2869, 2721, 2492, 1454, 1066, 758, 702 cm<sup>-1</sup>; **LRMS** (ESI + APCI)  $m/z$  [M+H] calcd 218.2, found 218.2

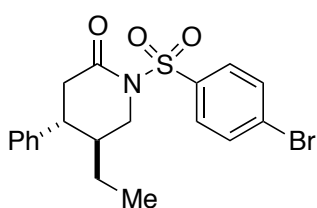

(4*R*,5*S*)-1-((4-bromophenyl)sulfonyl)-5-ethyl-4-phenylpiperidin-

2-one (**S3**): To a flame dried 25 mL round bottom flask containing a stirbar was added 107 mg (4*S*,5*R*)-5-ethyl-4-phenylpiperidin-2-one (**7a**) (synthesized via catalyst **5b**) (0.52 mmol, 1 equiv.) and 10 mL THF and cooled to -78 °C. To this was then added dropwise 0.357 mL *n*-Butyl lithium (1.6 M, hexanes) (0.572 mmol, 1.1 equiv). After stirring at -78 °C for 10 minutes a solution (146 mg 4-bromobenzenesulfonyl chloride (0.572 mmol, 1.1 equiv.) in 5 mL THF) was added dropwise to the reaction. This was stirred at -78 °C for 1 hour and then allowed to warm to room temperature and stir overnight. After 12 hours the reaction was cooled to 0 °C and quenched with 8 mL saturated NH<sub>4</sub>Cl. The reaction was extracted 3 x 10 mL CH<sub>2</sub>Cl<sub>2</sub>, dried with anhydrous Na<sub>2</sub>SO<sub>4</sub> and then concentrated *in vacuo*. The resulting crude oil was then purified by column chromatography to yield 180 mg (4*R*,5*S*)-1-((4-bromophenyl)sulfonyl)-5-ethyl-4-phenylpiperidin-2-one (82 %) as a crystalline white solid.  $R_f = 0.51$  (1:1 hexanes:ether)  $[\alpha]_D^{21} = -11.8$  (c = 0.010 g/ml, CH<sub>2</sub>Cl<sub>2</sub>); **<sup>1</sup>H-NMR** (400 MHz; CDCl<sub>3</sub>):  $\delta$  7.93-7.90 (m, 2H), 7.69-7.65 (m, 2H), 7.31-7.27 (m, 2H), 7.22 (dt,  $J = 7.2, 1.9$  Hz, 1H), 7.06-7.04 (m, 2H), 4.22 (dd,  $J = 12.5, 4.7$  Hz, 1H), 3.48 (dd,  $J = 12.5, 9.4$  Hz, 1H), 2.75 (dt,  $J = 10.1, 5.0$  Hz, 1H), 2.71-2.65 (m, 1H), 2.56 (dd,  $J = 17.4, 10.5$  Hz, 1H), 2.05-1.96 (m, 1H), 1.40 (dtd,  $J = 14.4, 7.3, 4.1$  Hz, 1H), 1.21-1.14 (m, 1H), 0.88 (t,  $J = 7.5$  Hz, 3H); **<sup>13</sup>C NMR** (101 MHz; CDCl<sub>3</sub>):  $\delta$  169.9, 141.7, 137.7, 132.0, 130.3, 129.12, 128.95, 127.21, 127.09, 49.8, 44.0, 41.5, 41.1, 24.3, 11.1; **IR** (ATR, neat) 1960, 2923, 1692, 1170 cm<sup>-1</sup>; **LRMS** (ESI + APCI)  $m/z$  [M+H] calcd 422.0, found 422.1

**General Procedure for the Synthesis of Nitroalkenes**

To a dry round bottom flask was added cyclopentane carboxaldehyde (1.02 g, 10.4 mmol), nitromethane (840  $\mu$ L, 15.6 mmol), and 1:1 THF/*t*-BuOH (10 mL). This solution was cooled to 0 °C and potassium tert-butoxide (0.233 g, 2.08 mmol) added in one portion. The reaction was then stirred at 0 °C for 1 h then warmed to room temperature and stirred for 12 h. After completion, saturated aqueous NH<sub>4</sub>Cl solution (20 mL) was added to quench the reaction and then extracted with CH<sub>2</sub>Cl<sub>2</sub> (3 x 20 mL). The combined organic extracts were then dried over anhydrous Na<sub>2</sub>SO<sub>4</sub> and concentrated *in vacuo*. After drying the crude residue under vacuum (4 mm) for 1 h, CH<sub>2</sub>Cl<sub>2</sub> (20 mL) was added followed by cooling to 0 °C. Trifluoroacetic anhydride (1.52 mL, 10.9 mmol) was added followed by the slow dropwise addition of Et<sub>3</sub>N (3.04 mL, 21.8 mmol). After stirring for 1 h at 0 °C the reaction was allowed to warm to room temperature and stirred an additional 2 h. The reaction was diluted with CH<sub>2</sub>Cl<sub>2</sub> (20 mL) followed by the addition of water (20 mL). The organic layer was separated and washed with saturated aqueous NH<sub>4</sub>Cl solution (3 x 20 mL), dried (Na<sub>2</sub>SO<sub>4</sub>) and concentrated *in vacuo* to give a yellow oil that was purified by column chromatography (20:1 hexanes:ether) yielding 0.779 g (53%) of (*E*)-(2- nitrovinyl)cyclopentane as a pale yellow oil.

**Proposed Stereochemical Models to Account for Selectivity:**

The inversion of diastereoselectivity between our reaction and that observed in Liu's reaction is intriguing. Complicating matters is that the same stereochemistry is observed at the beta-position in the product in spite of the fact that the pseudo-enantiomeric catalysts are used. This suggests that the electrophile approaches from the opposite prochiral face of the enal, most likely because of an inversion of Breslow intermediate geometry. The reasons for this are not clear at this time, but may have much to do with the nature of the N-aryl substituent. We present an analysis of the diastereomeric transition states that may be involved in settling these issues of selectivity.

*Transition States and Stereoisomers Formed (this work):*

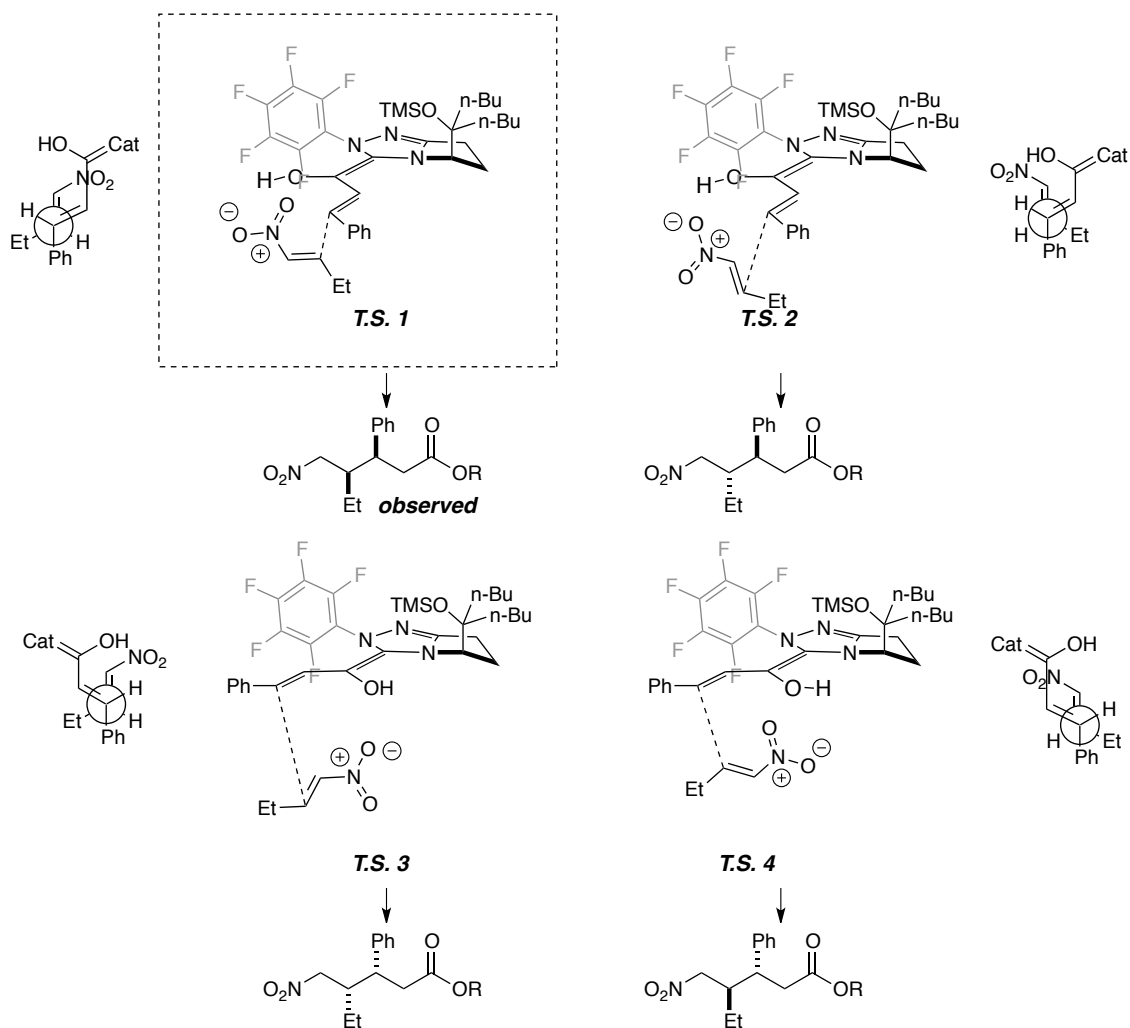

**Scheme S1**

## Supporting Information

Transition States and Stereoisomers Formed (Liu et al - reference 7 in text):

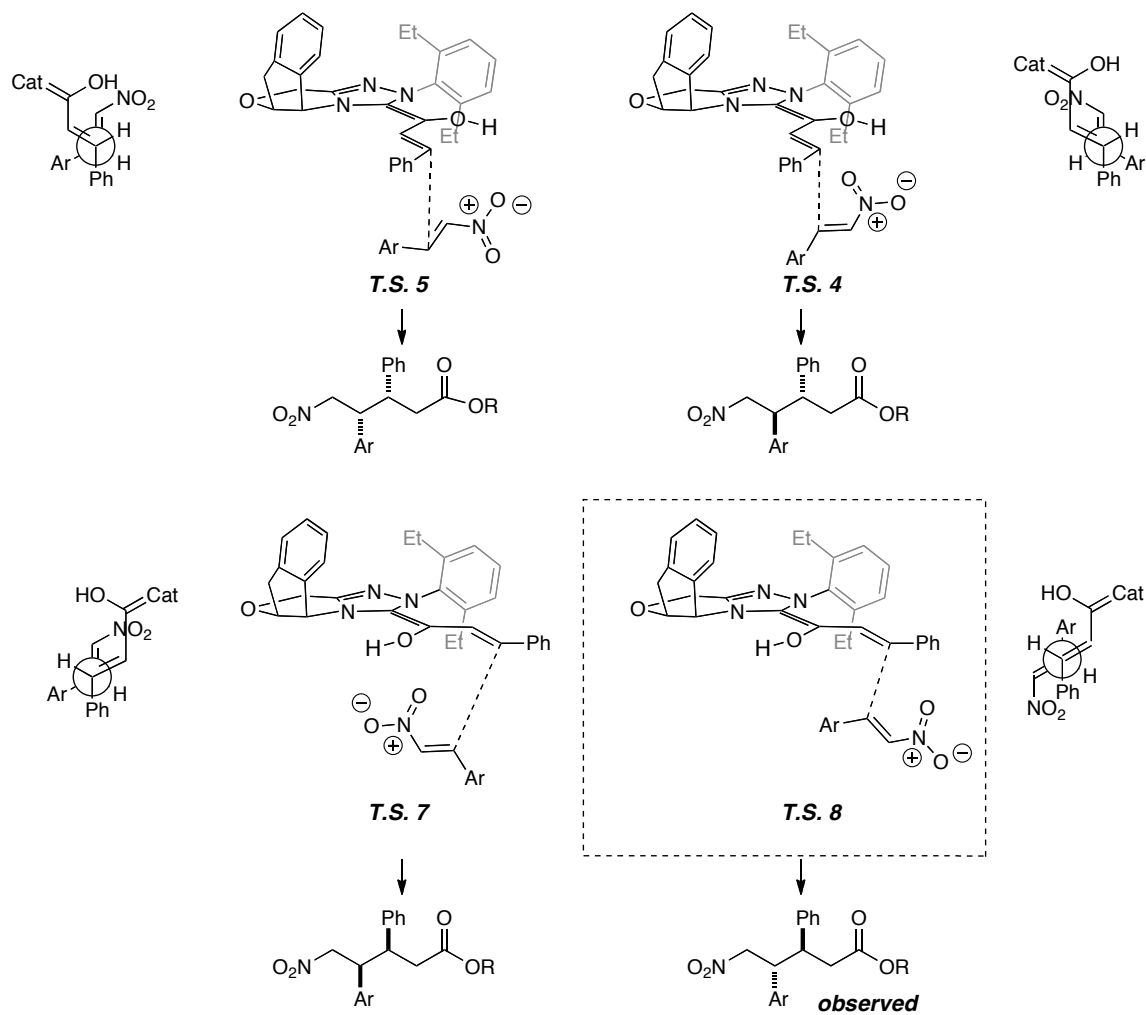

Scheme S2

Supporting Information

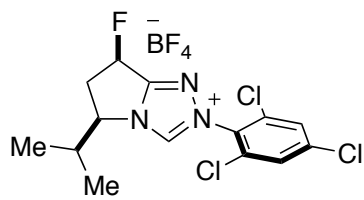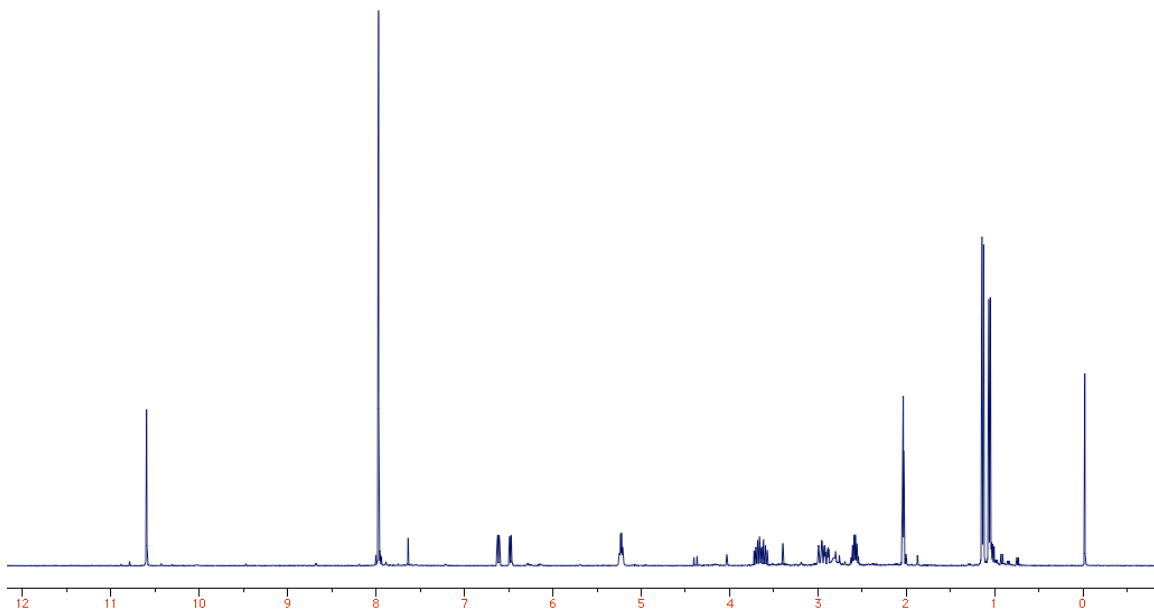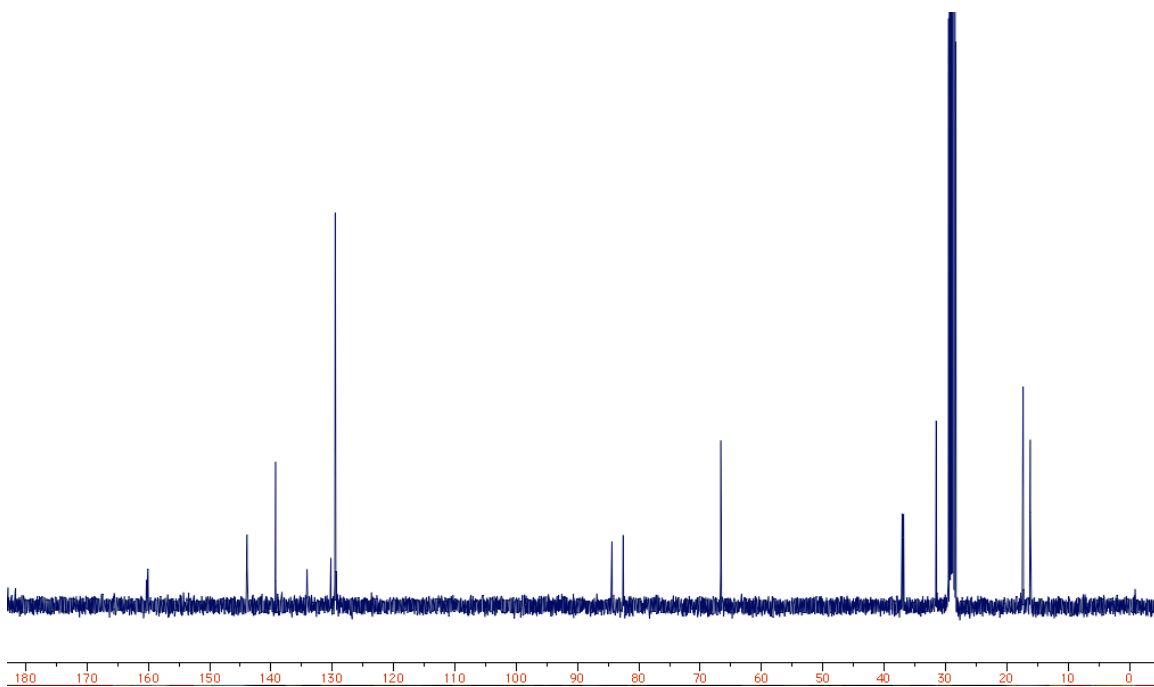

Supporting Information

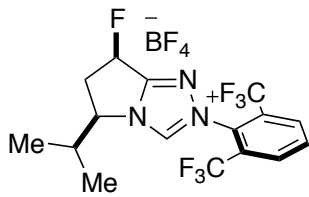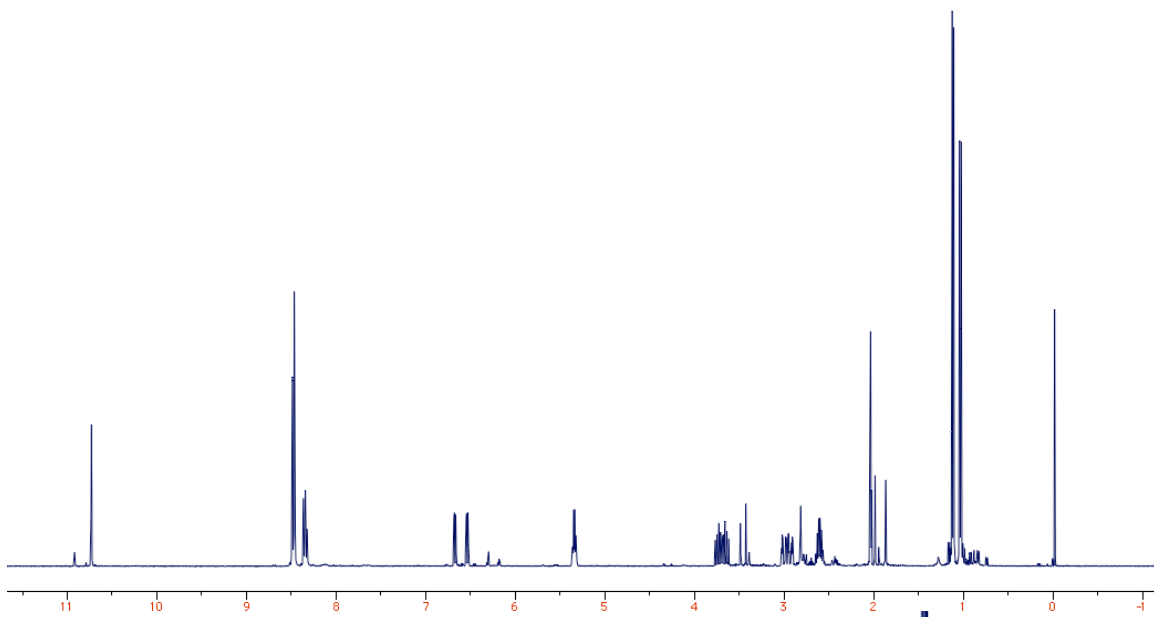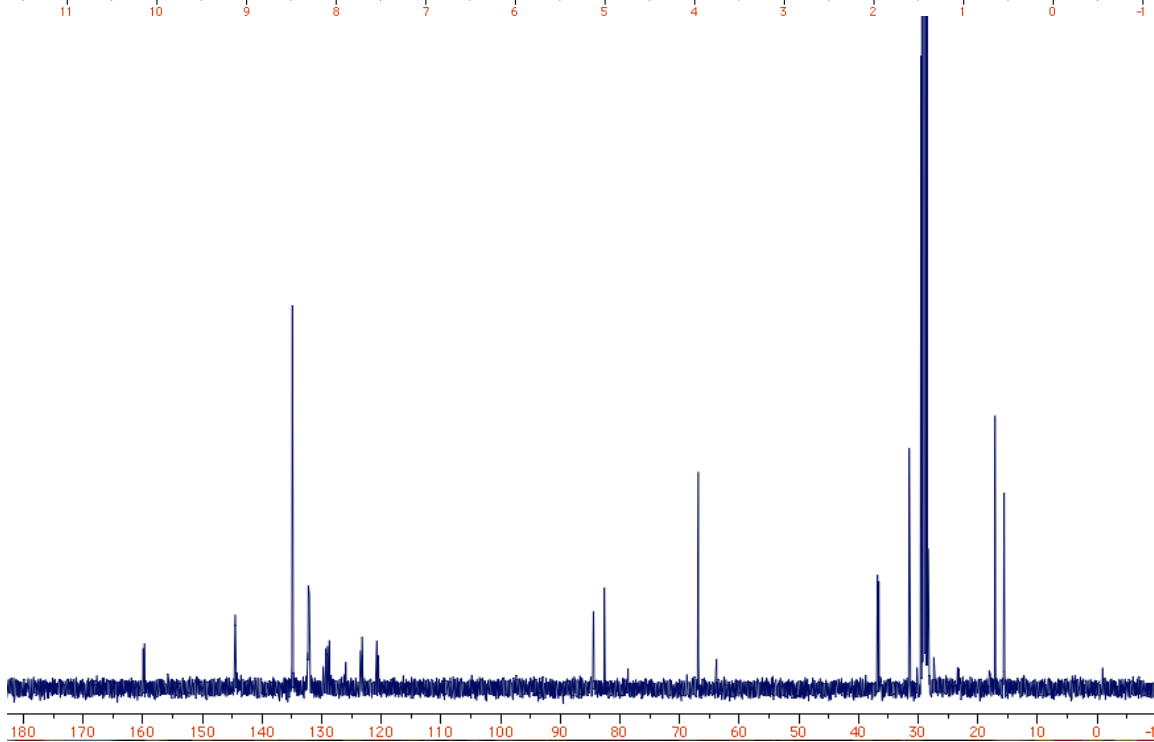

Supporting Information

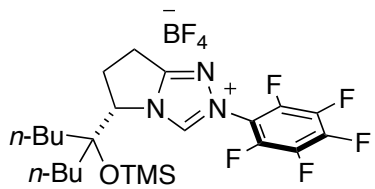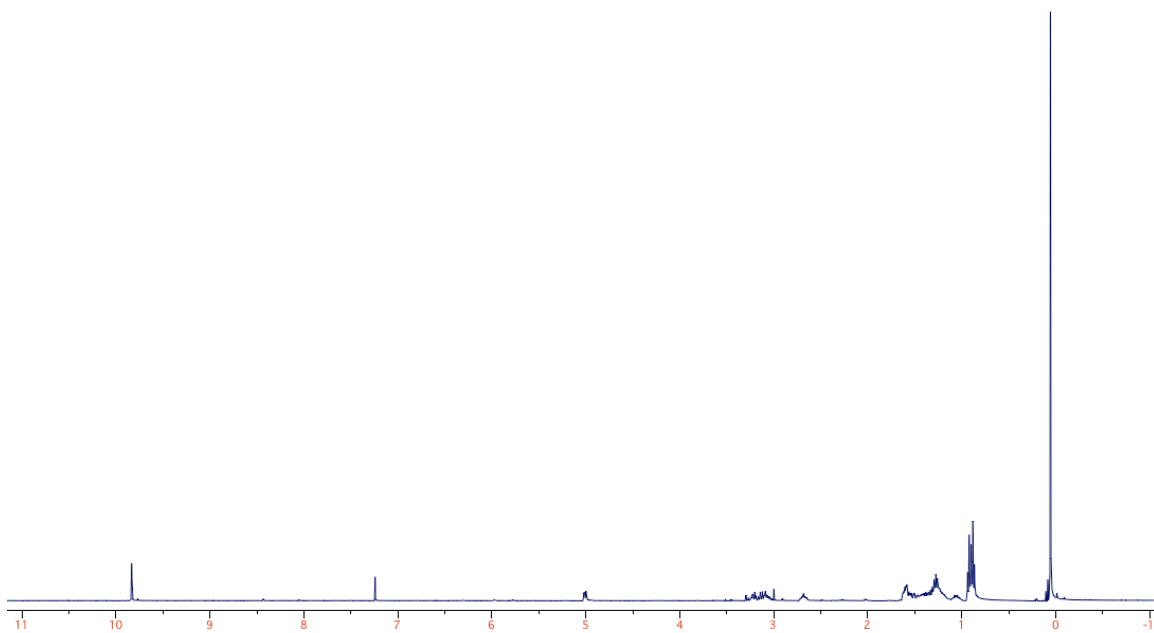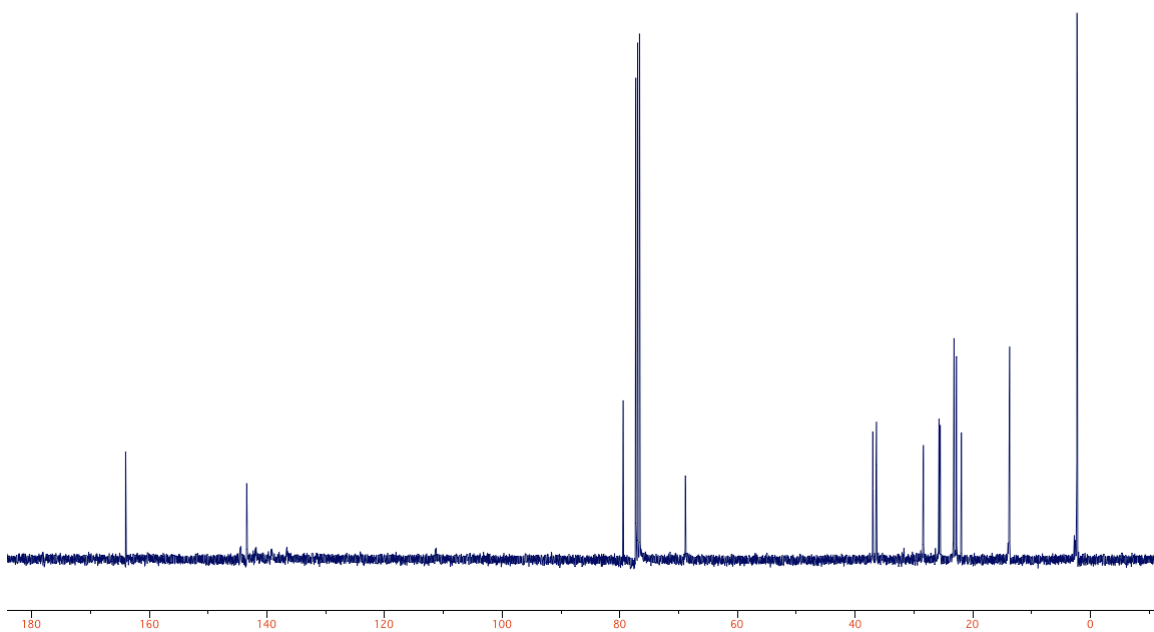



Supporting Information

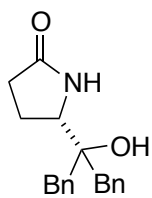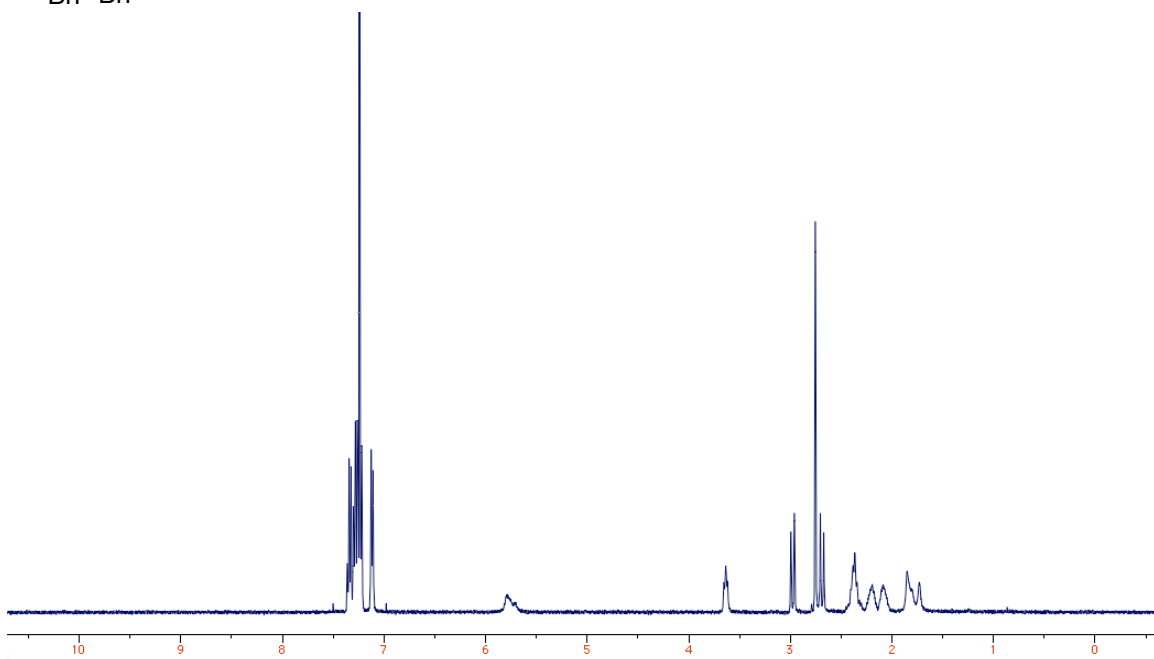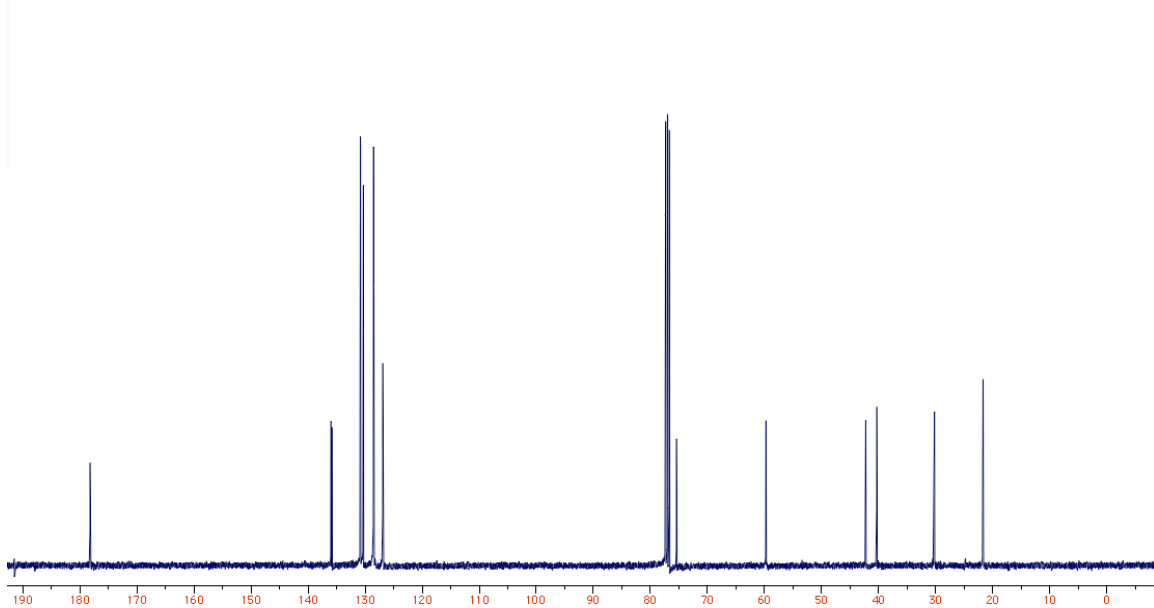

Supporting Information

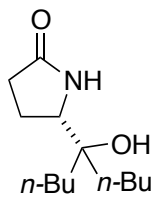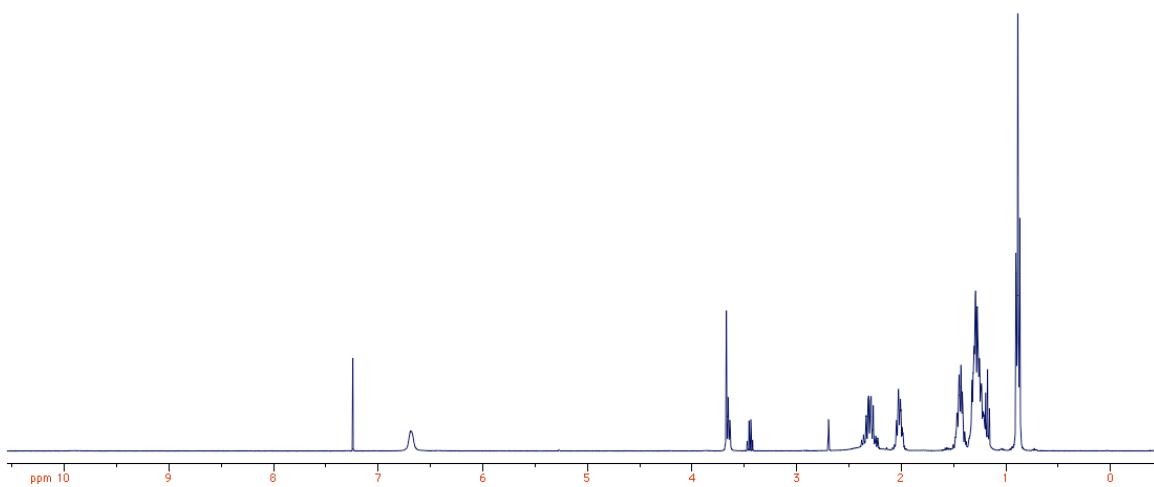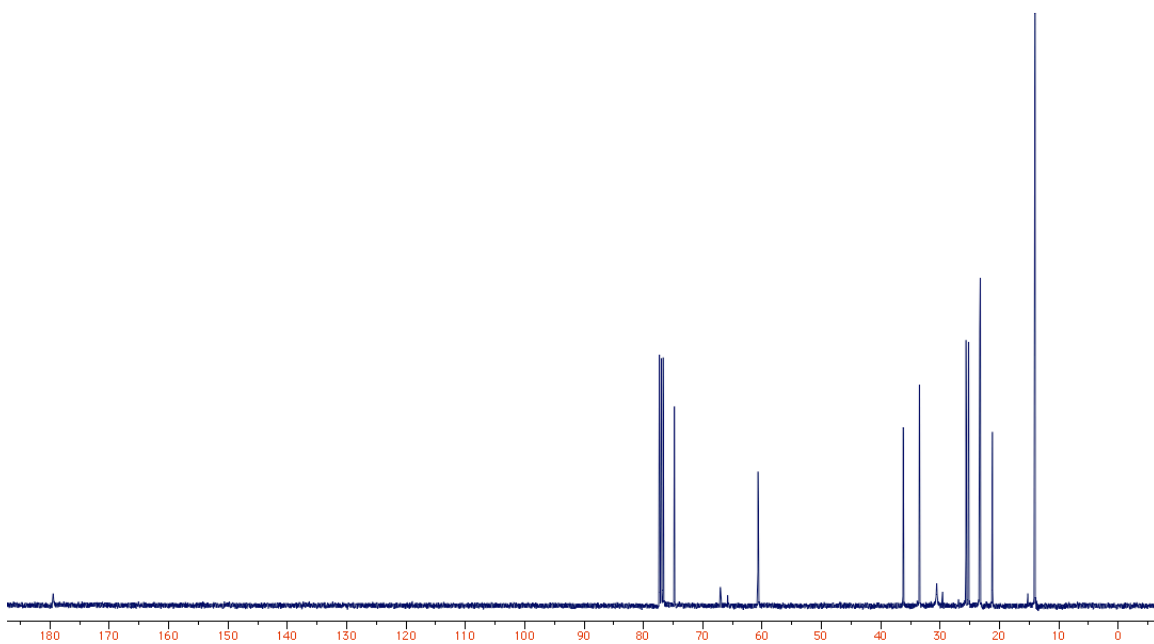

Supporting Information

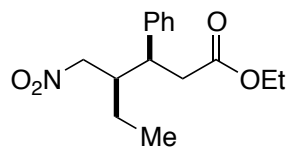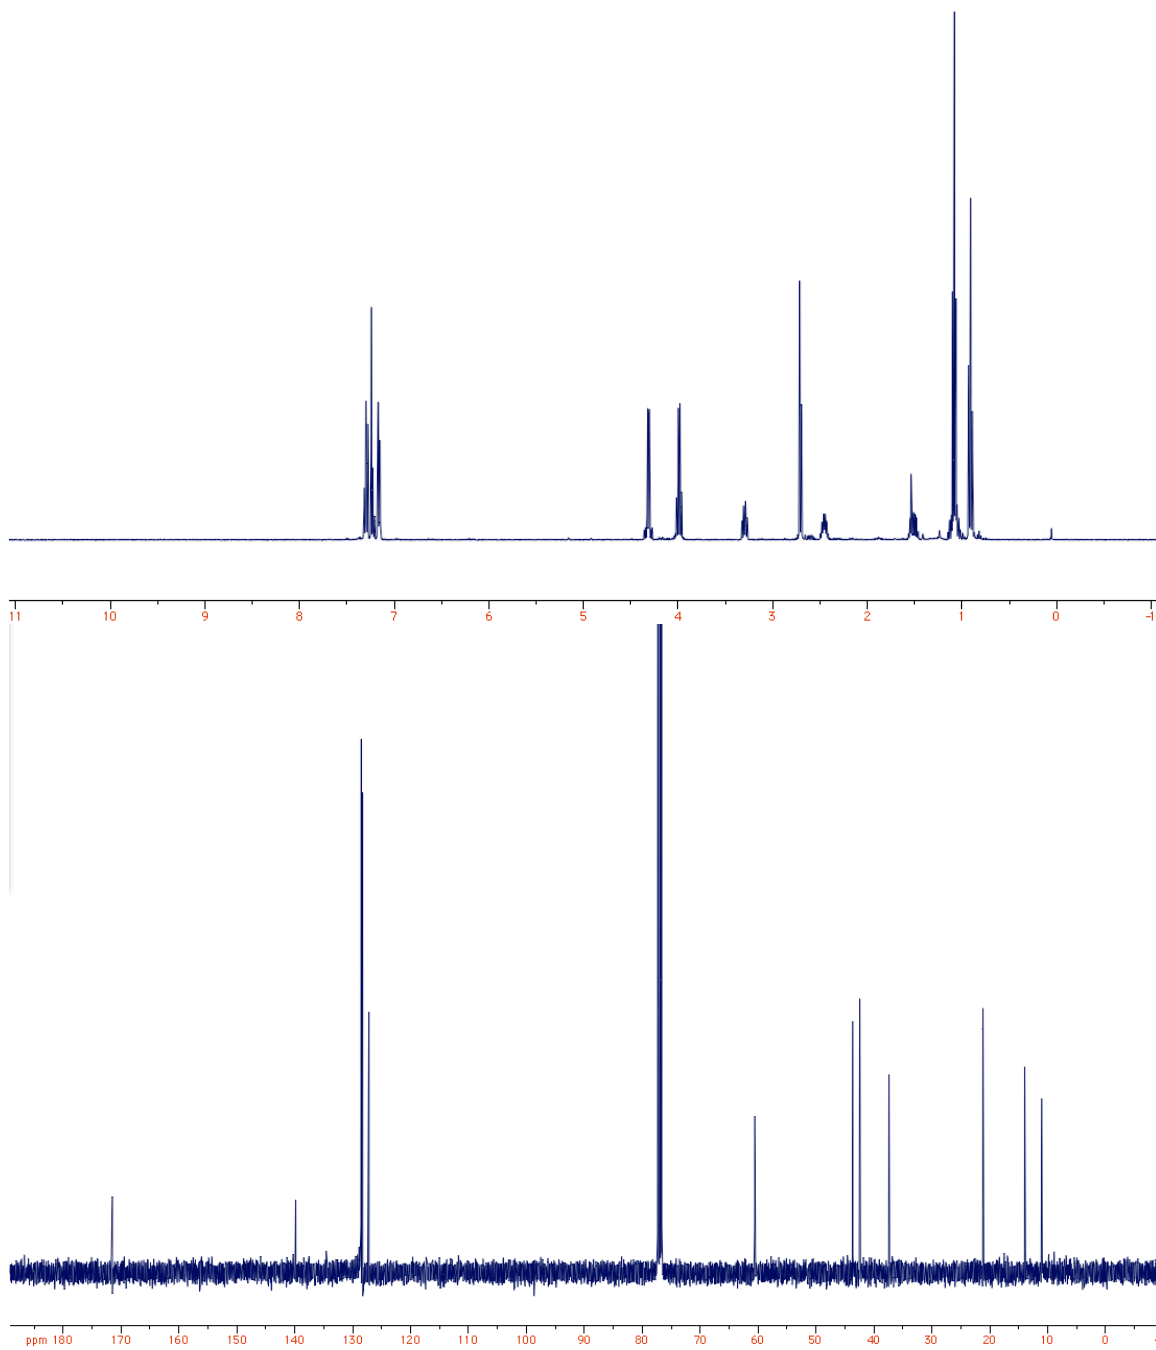

Supporting Information

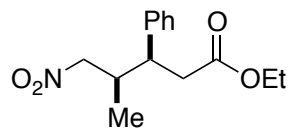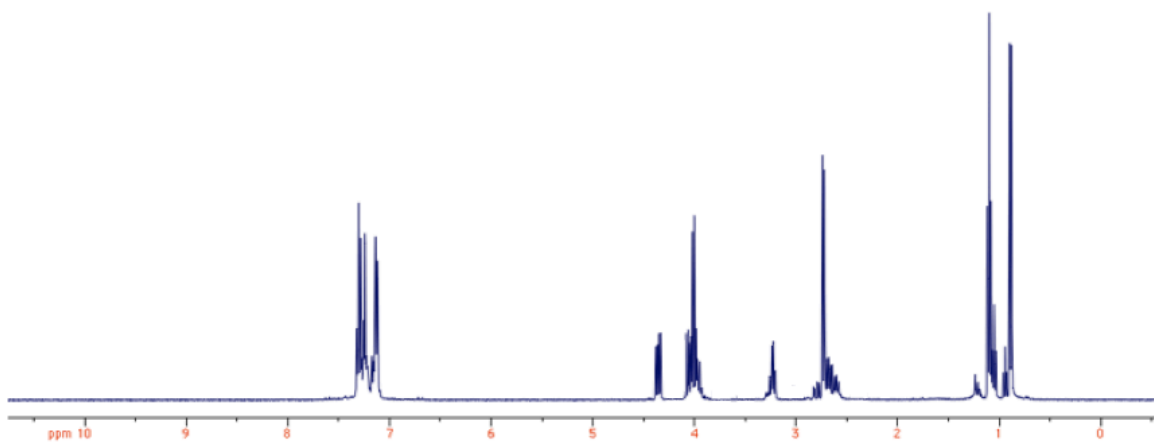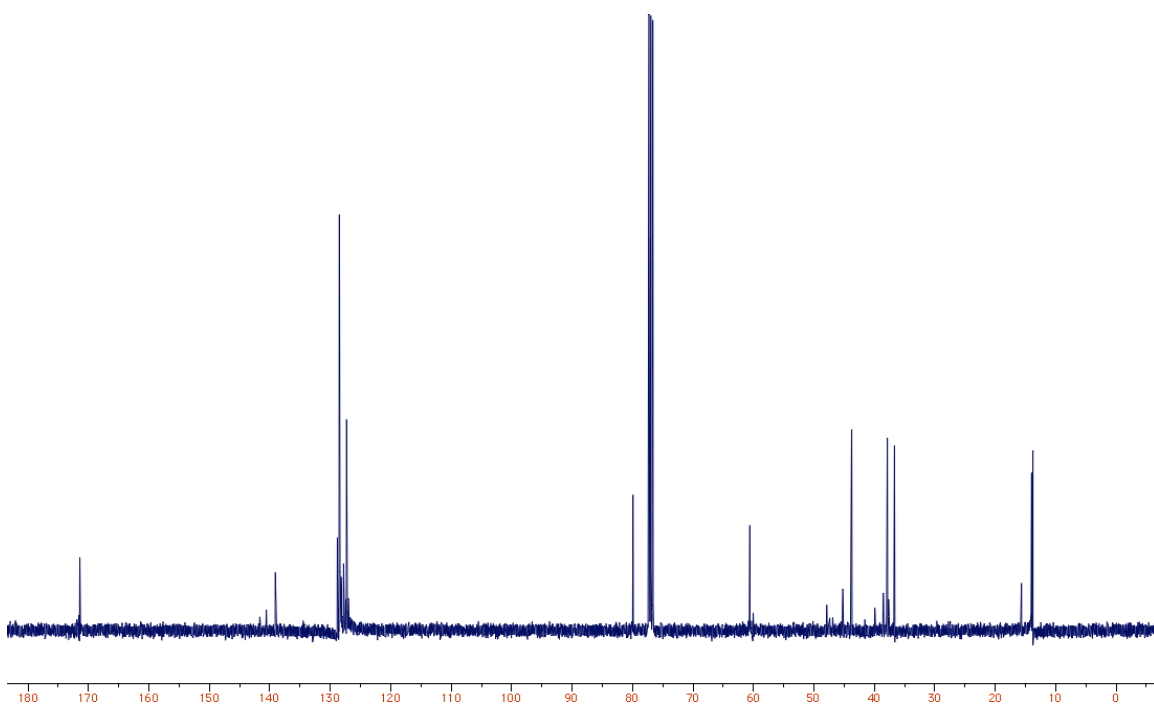

Supporting Information

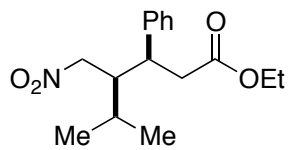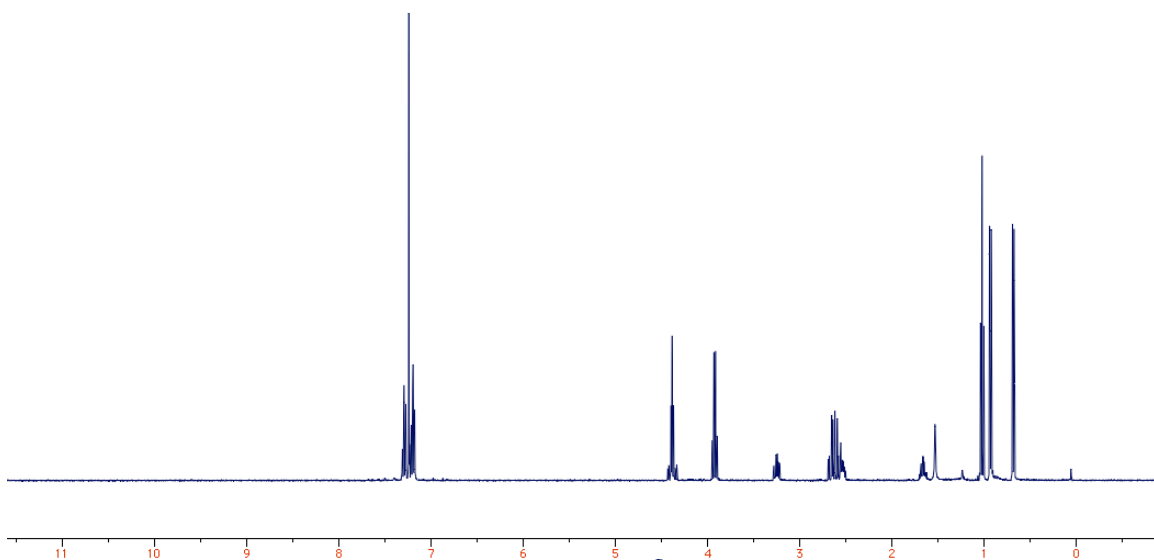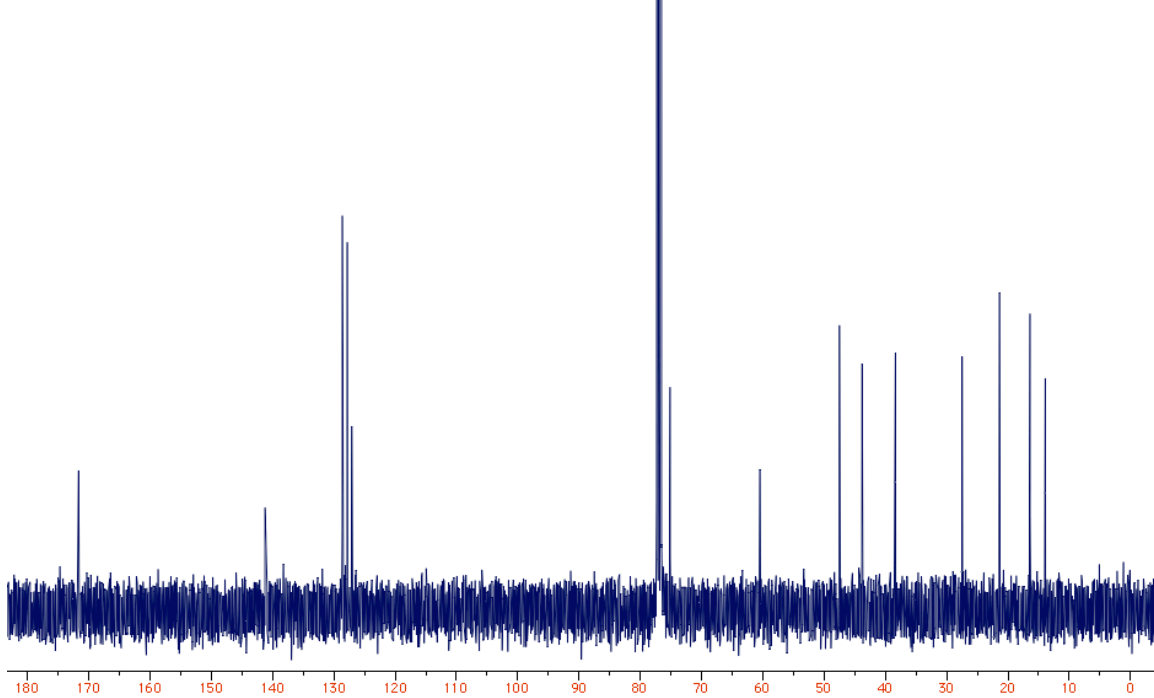

Supporting Information

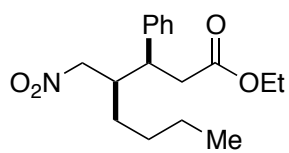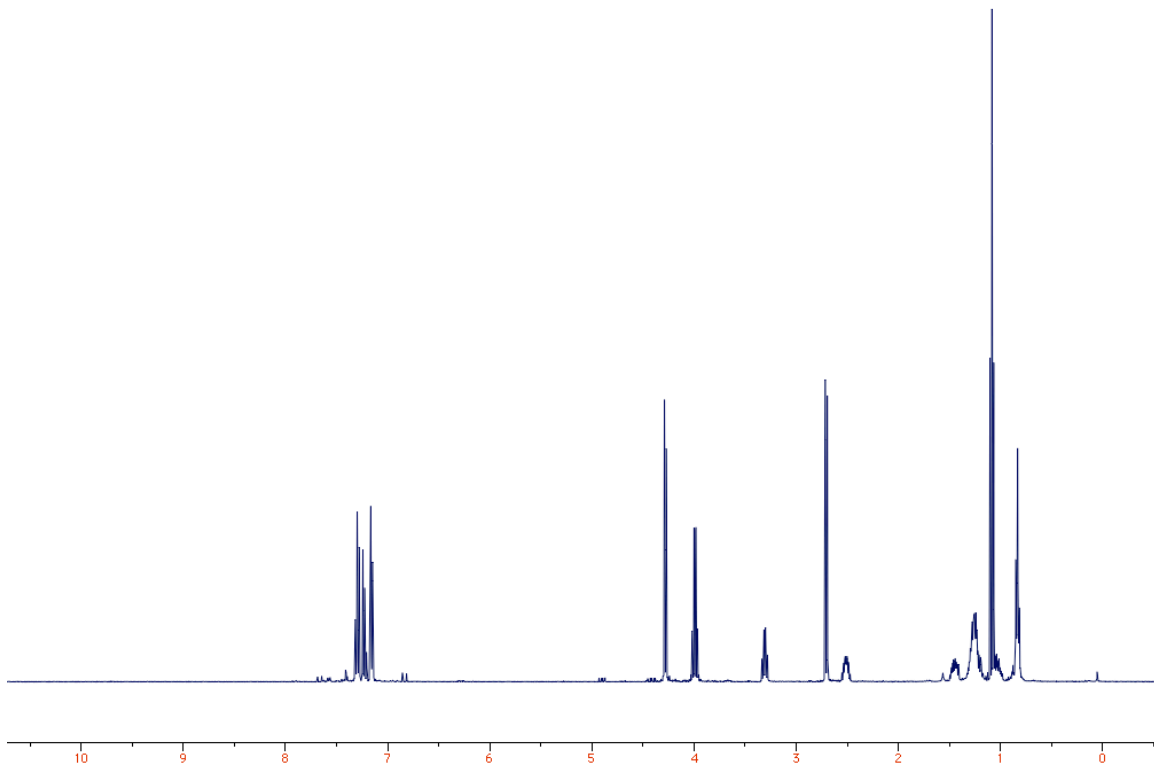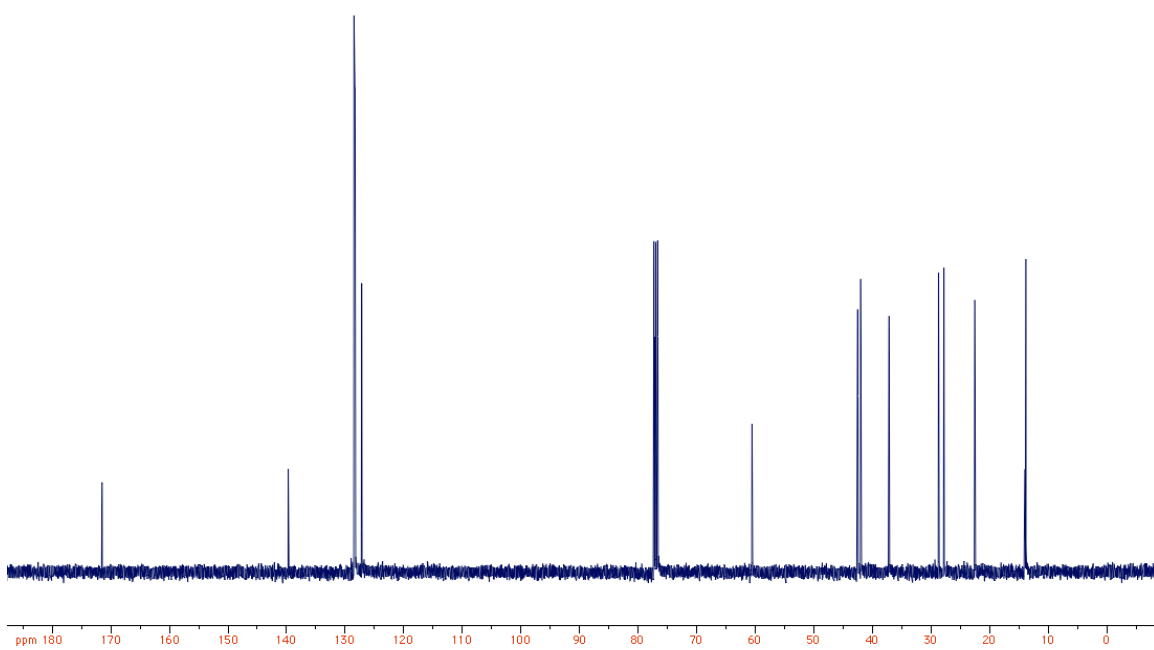

Supporting Information

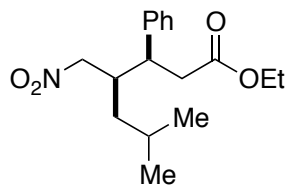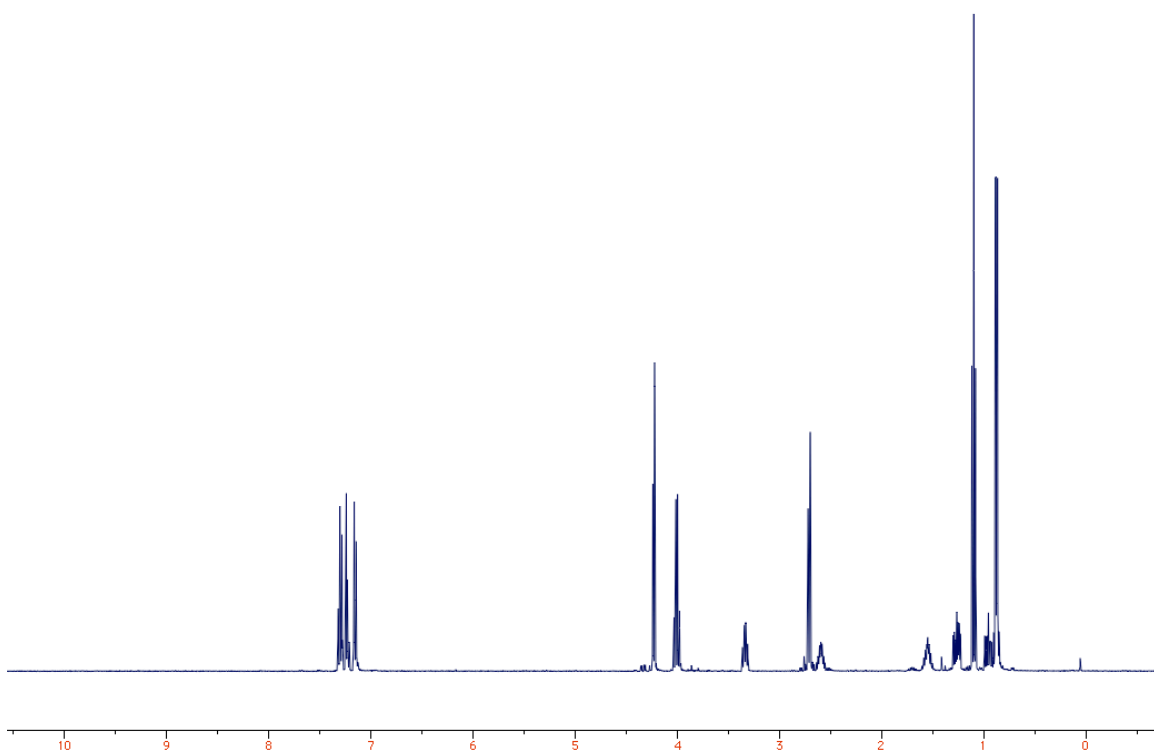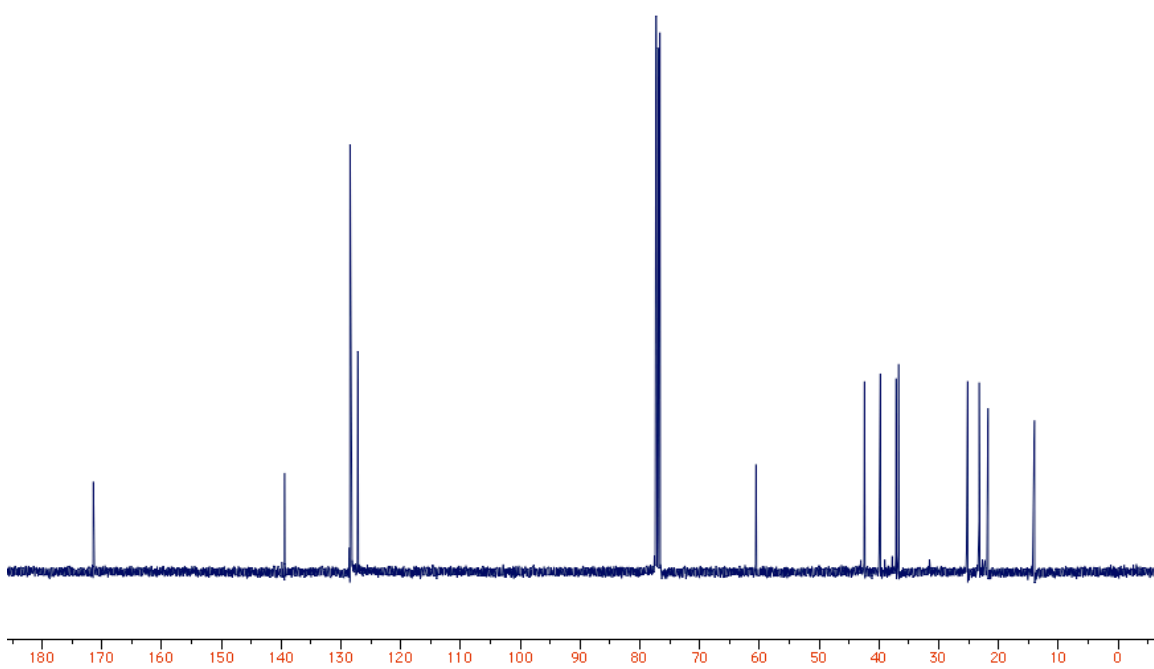

Supporting Information

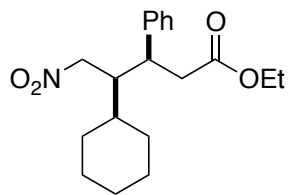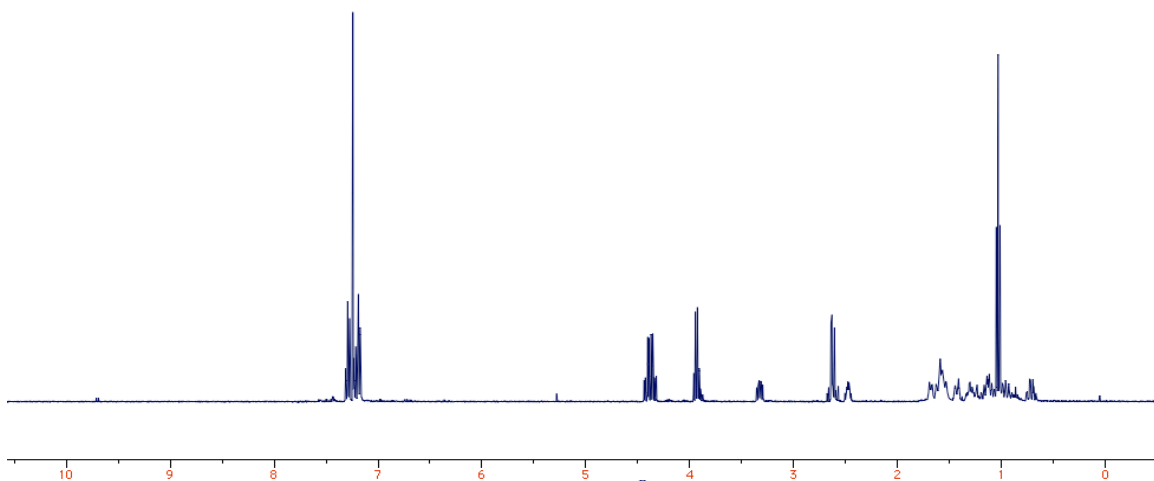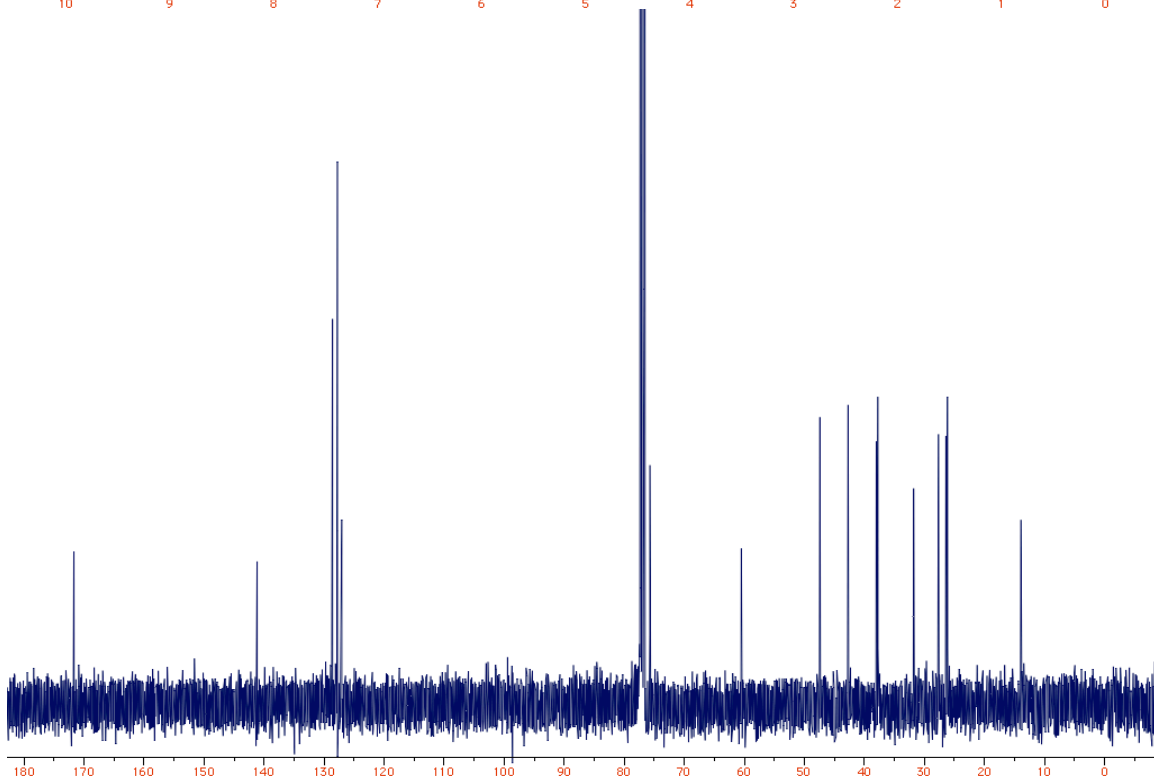



Supporting Information

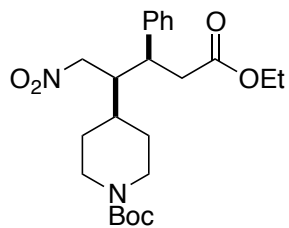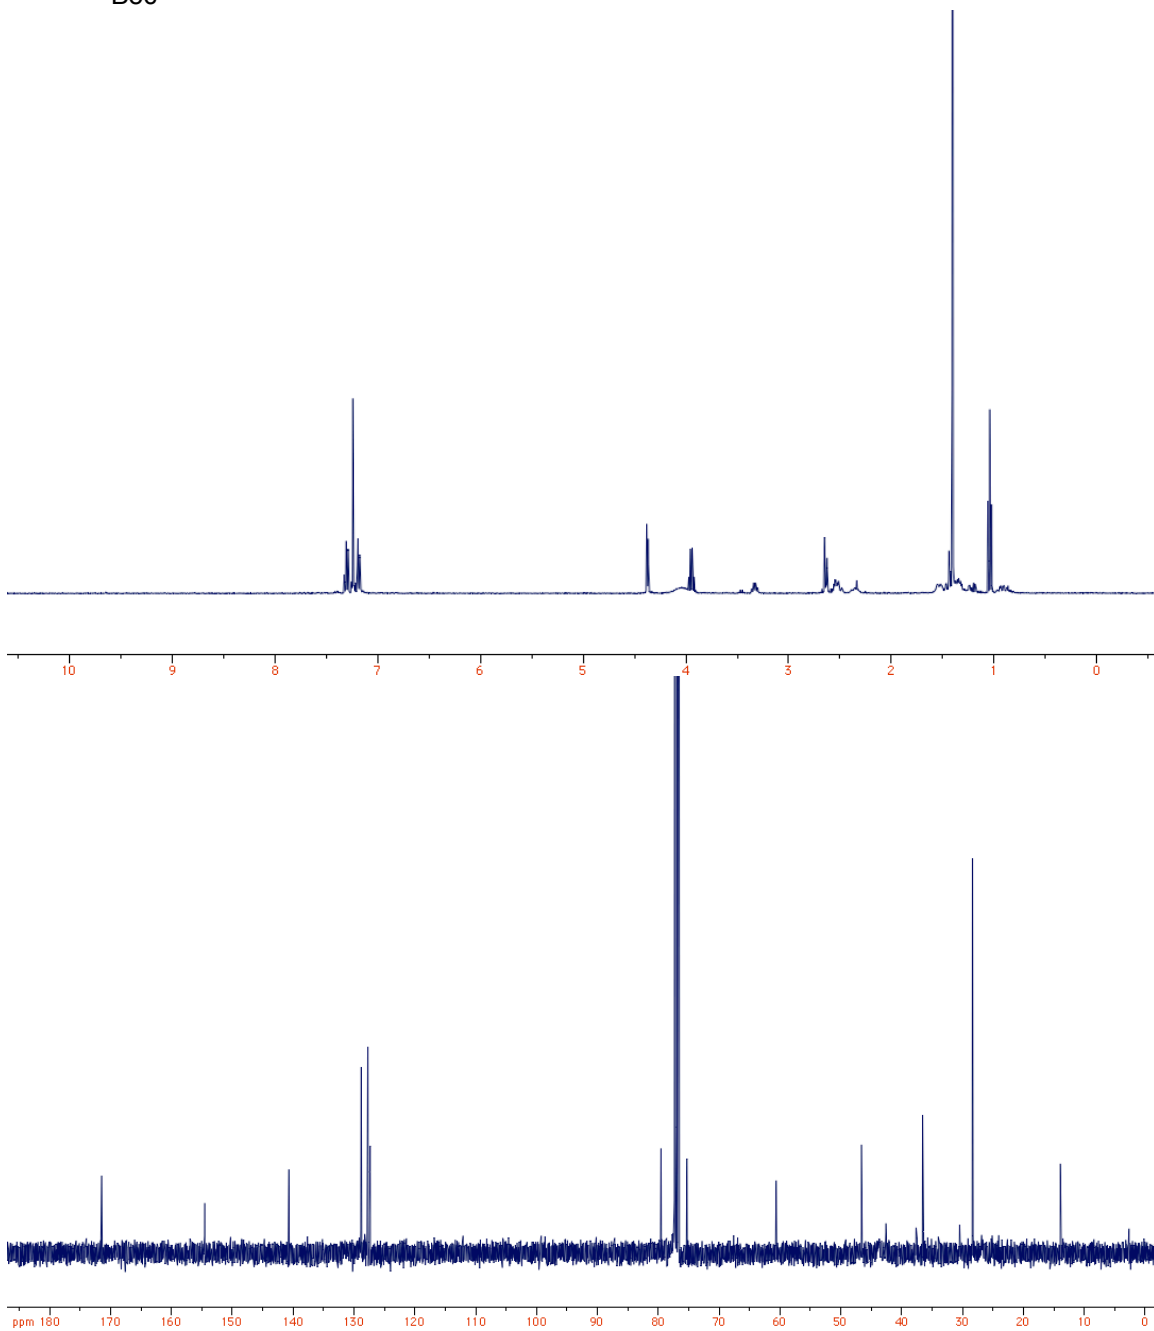

Supporting Information

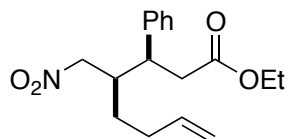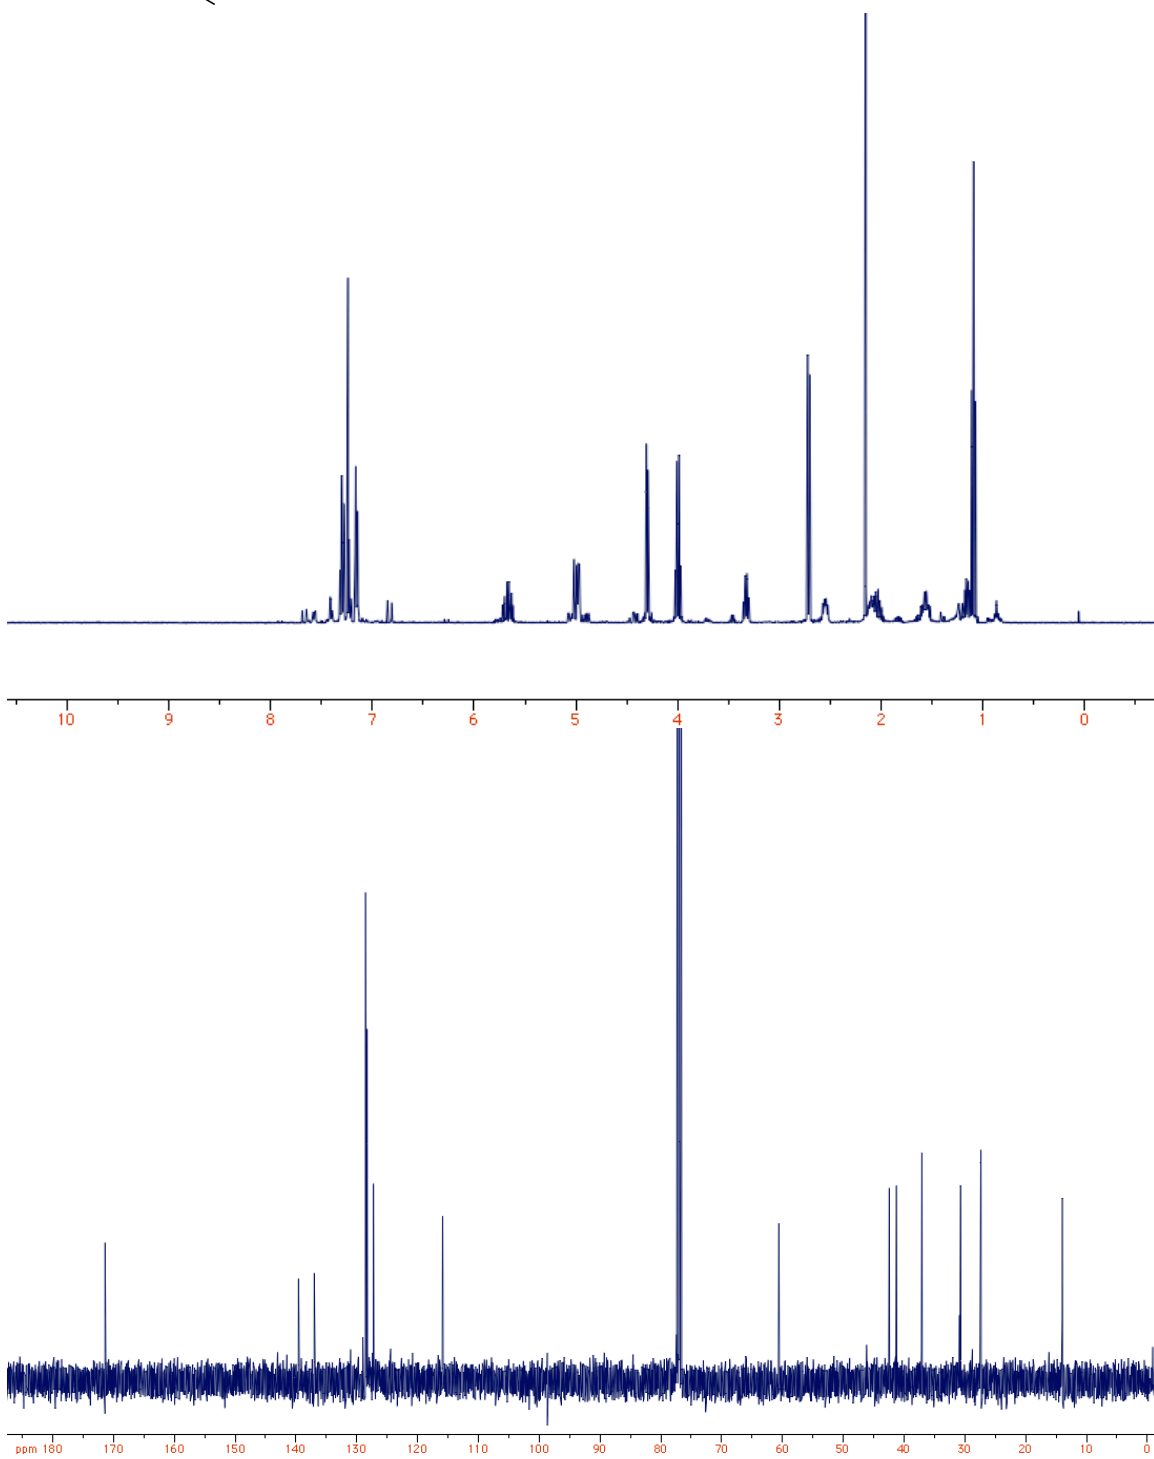

Supporting Information

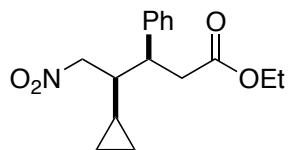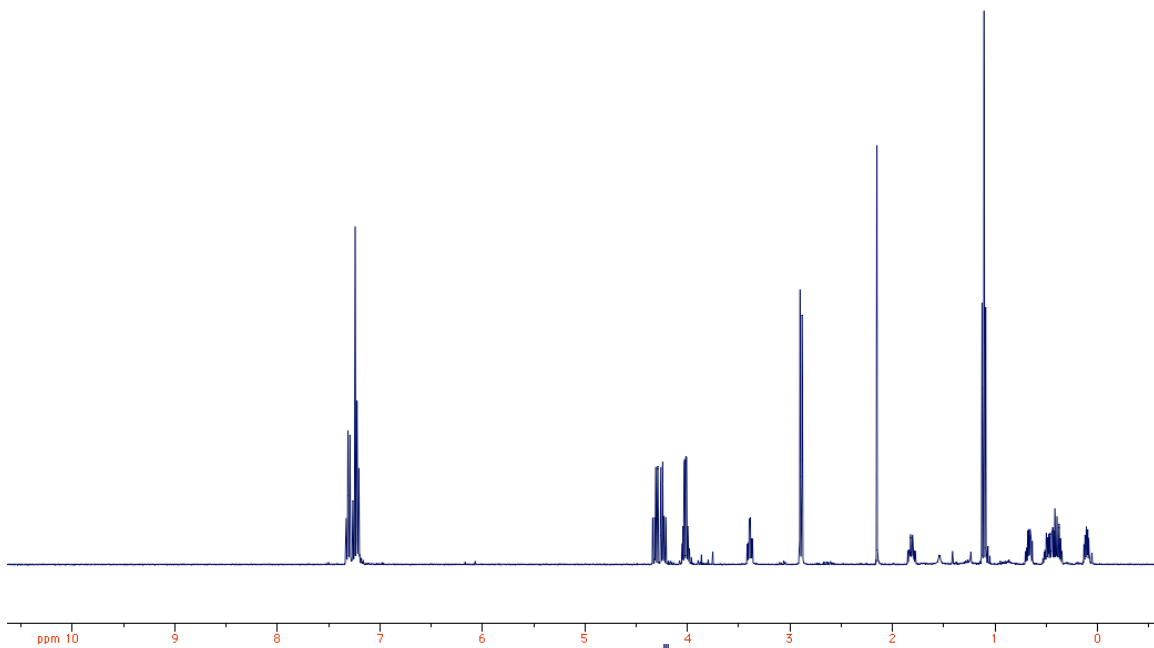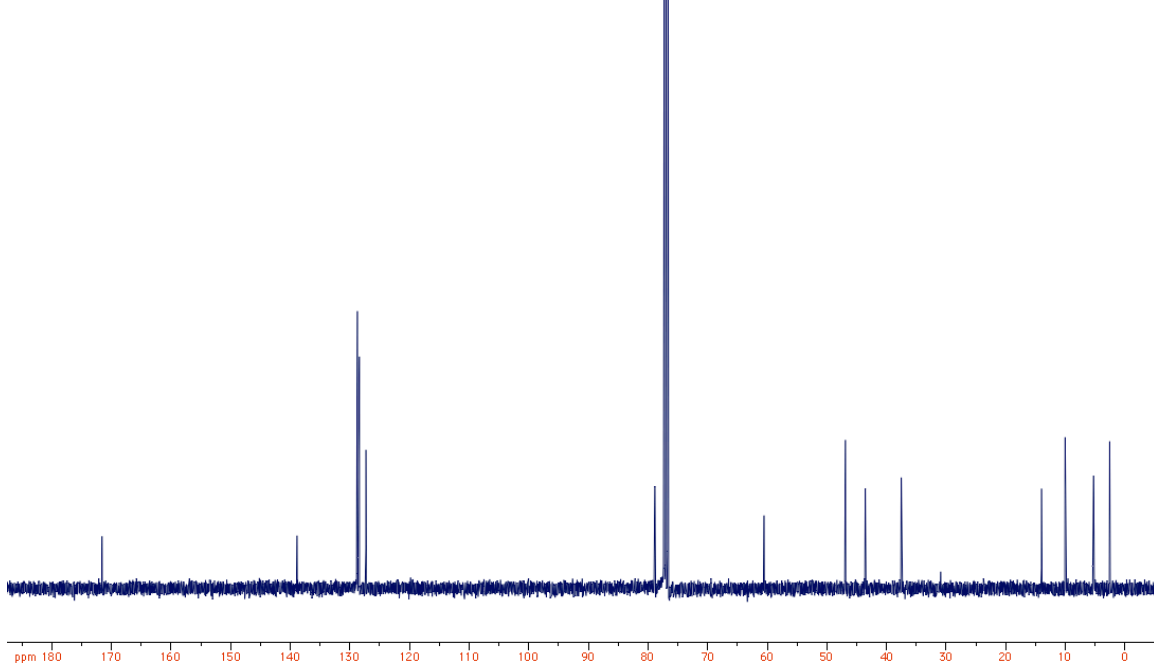

Supporting Information

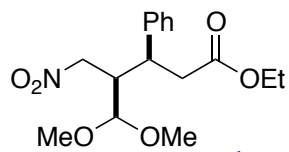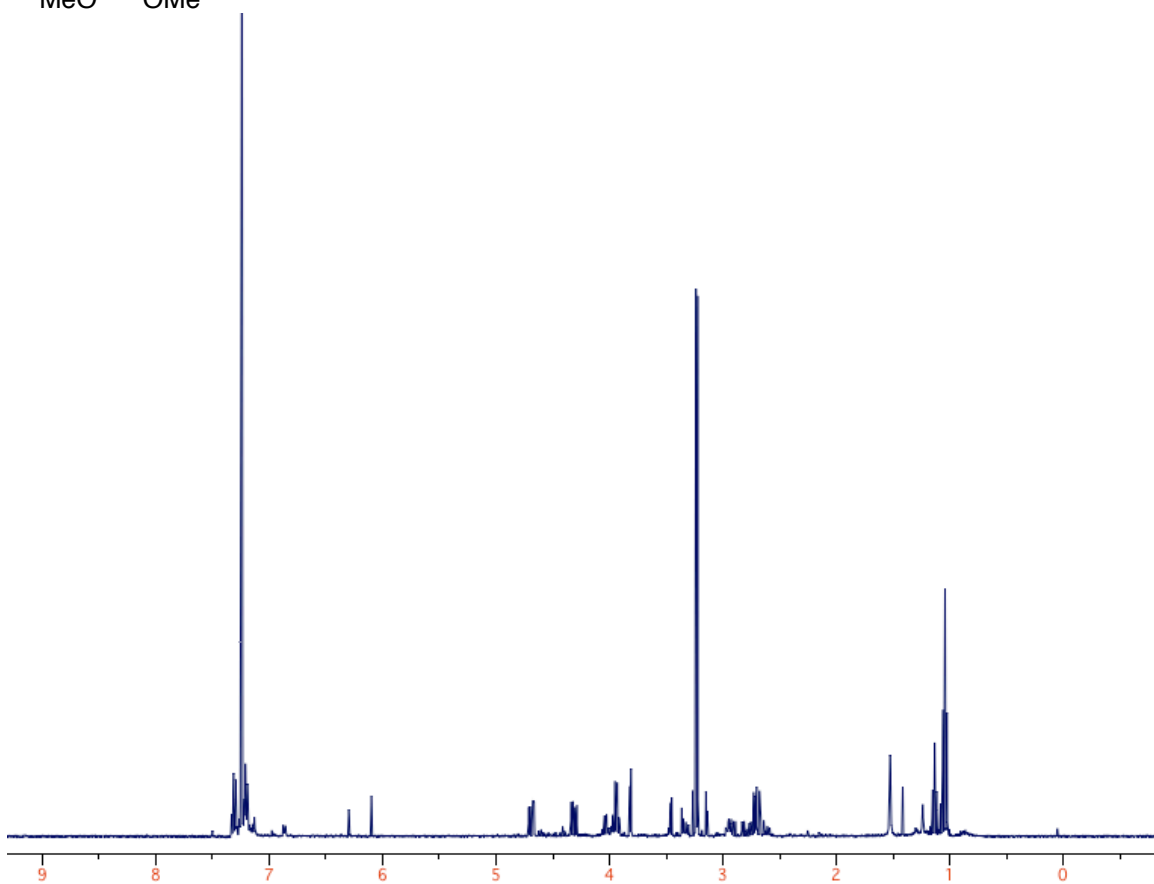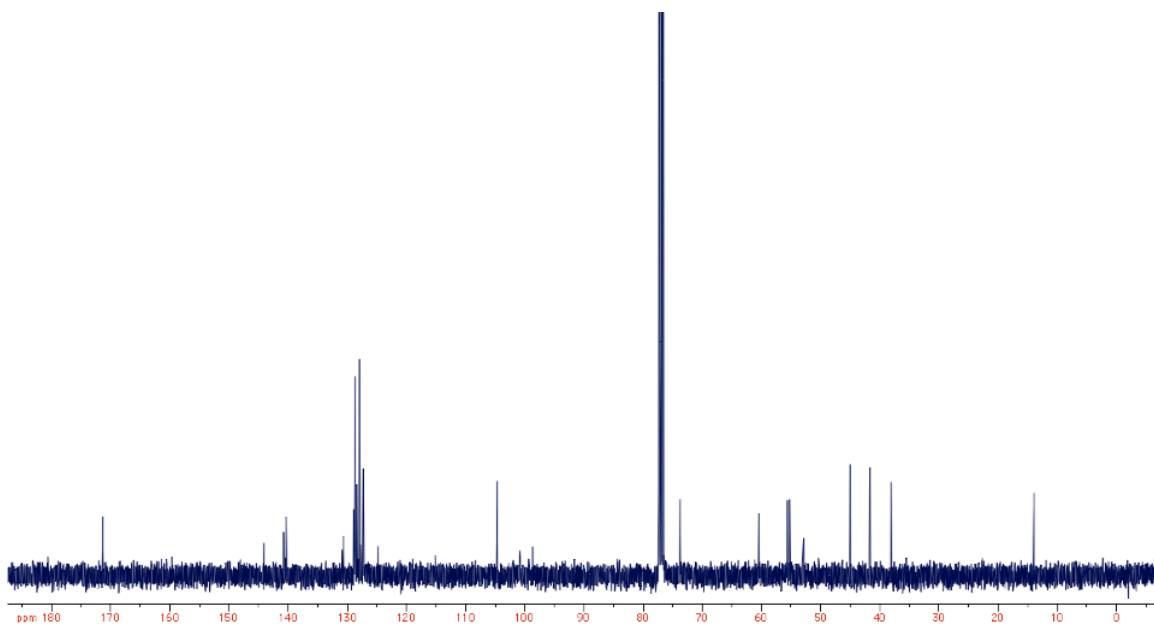

Supporting Information

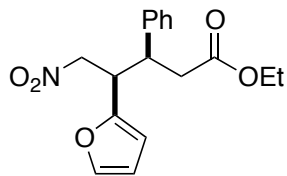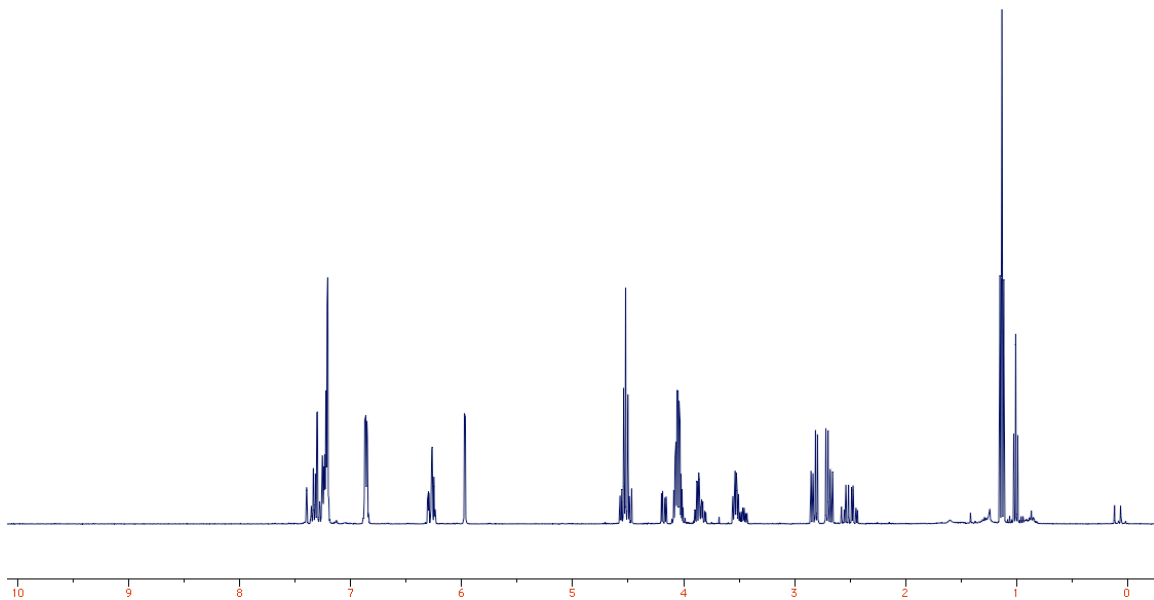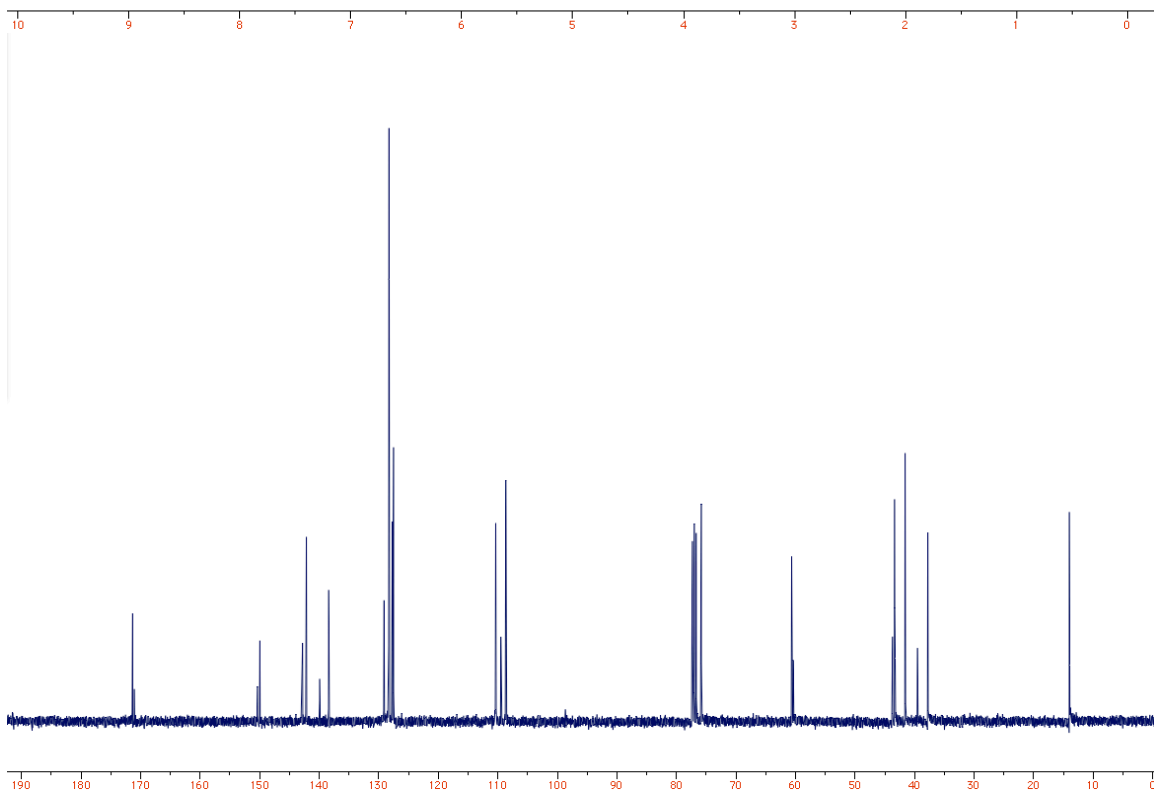

Supporting Information

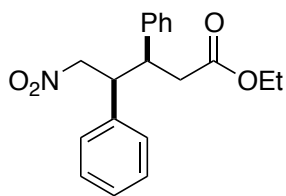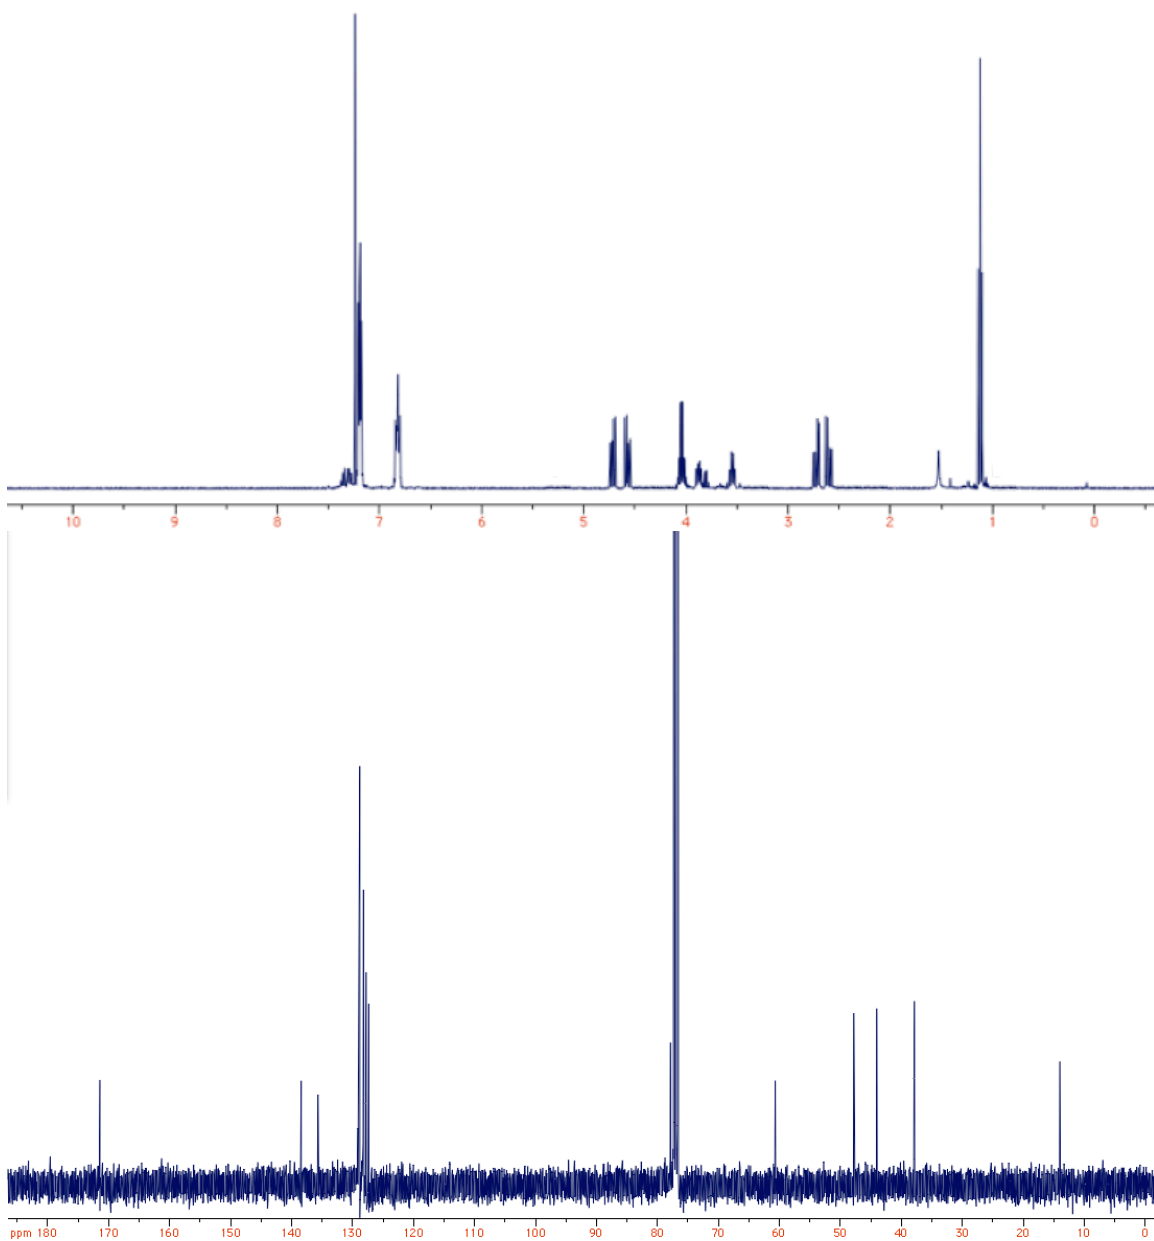

Supporting Information

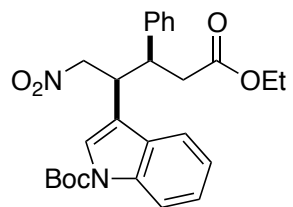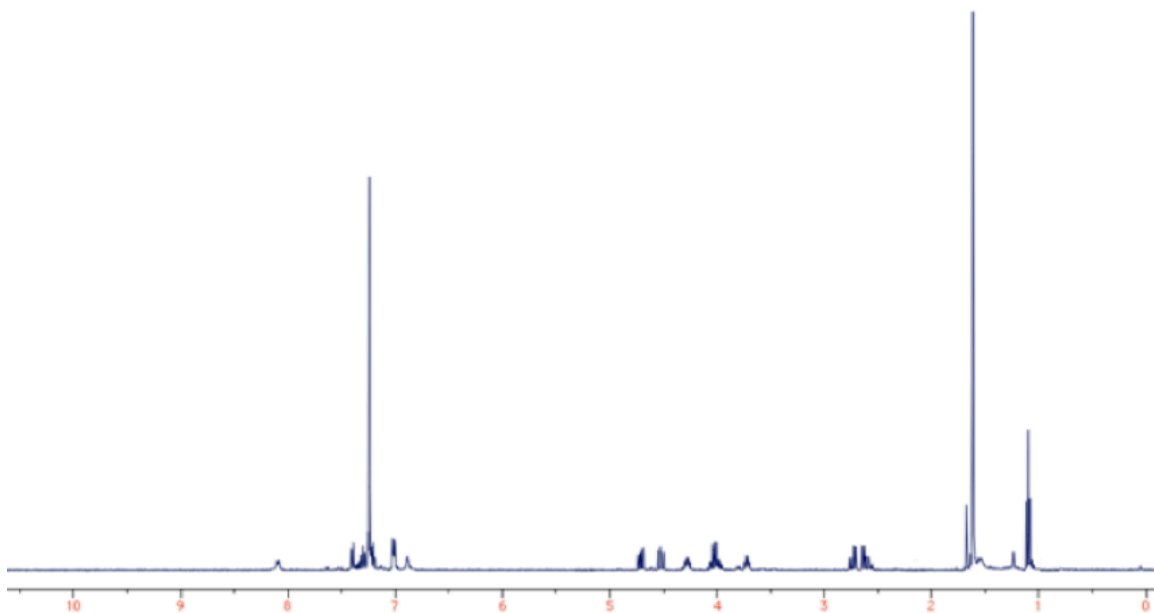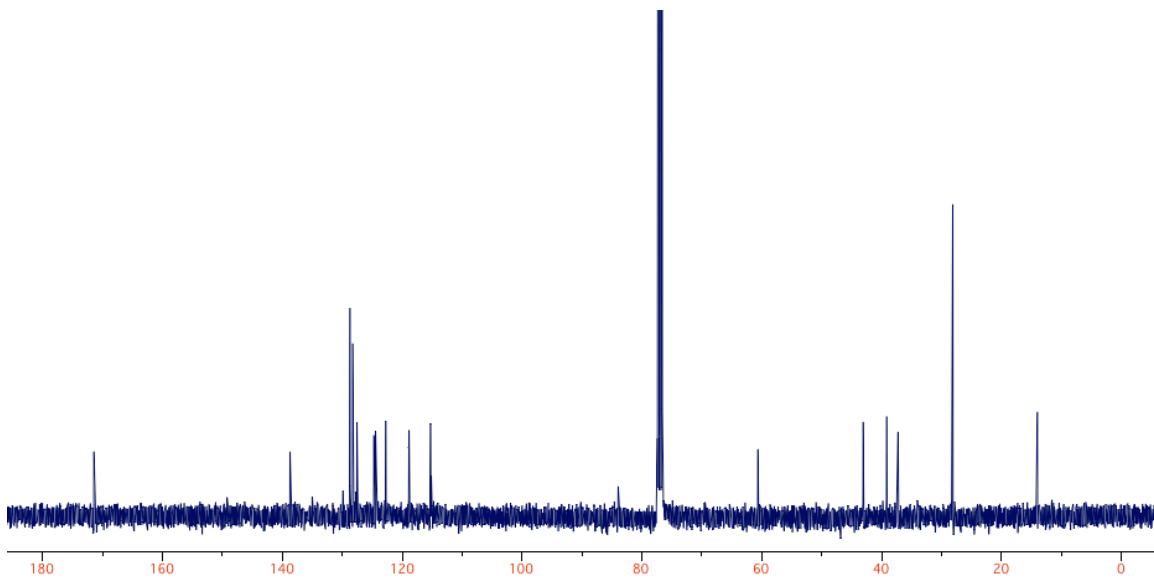

Supporting Information

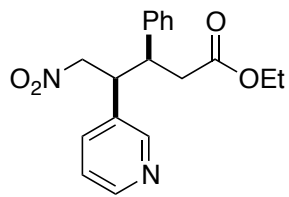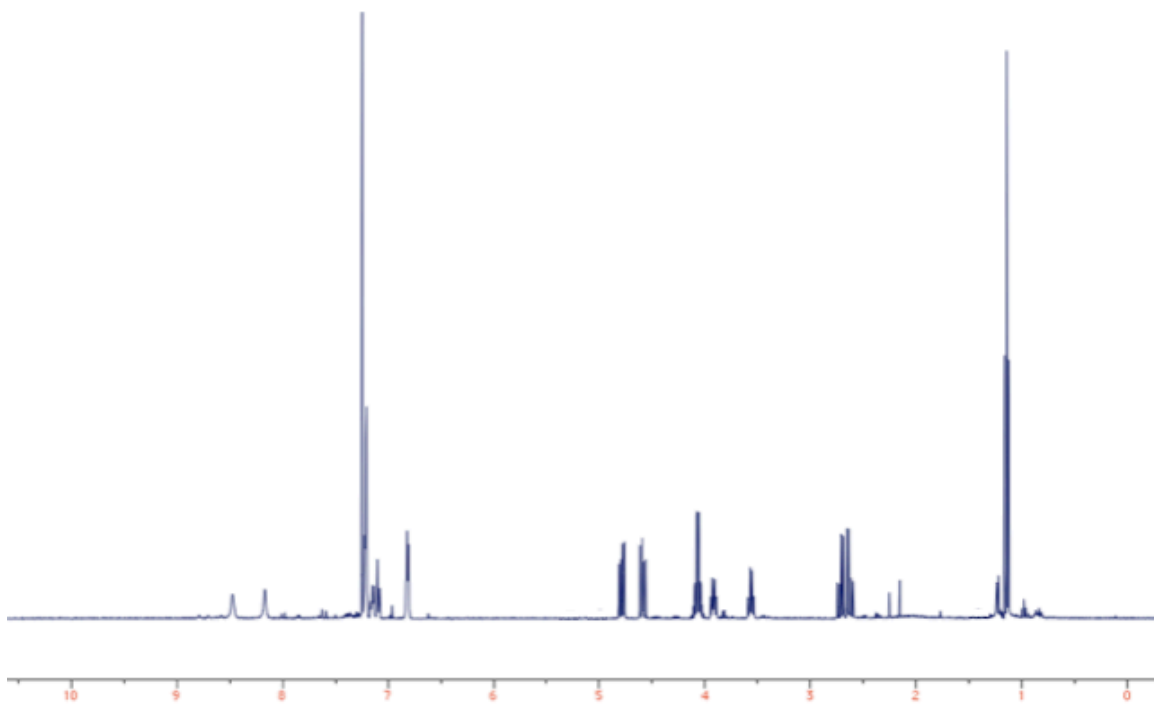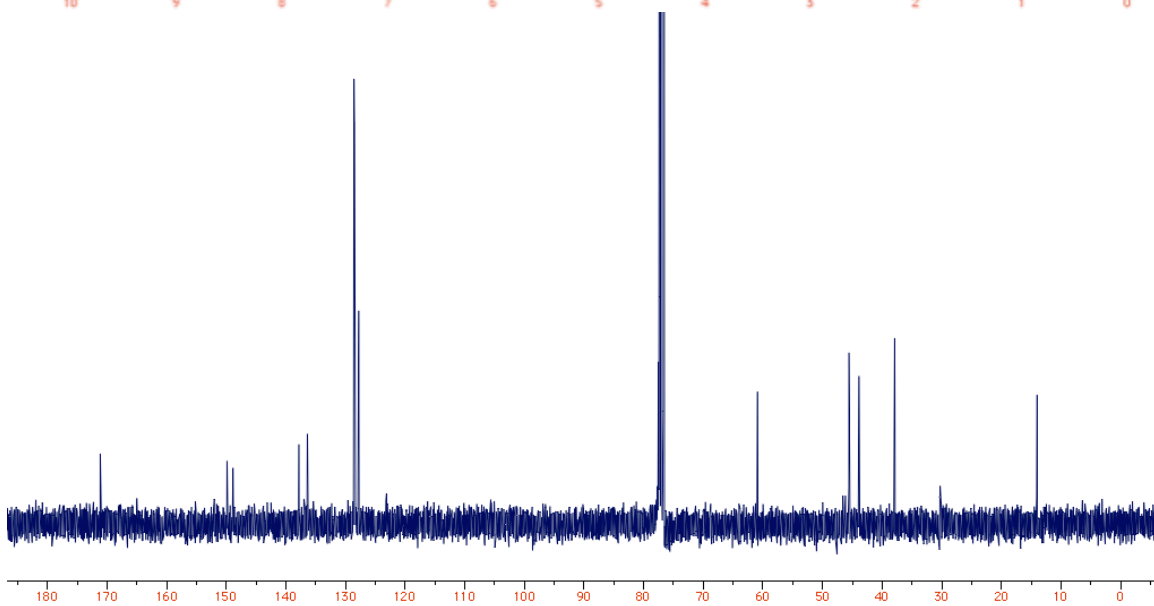



Supporting Information

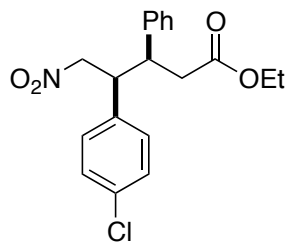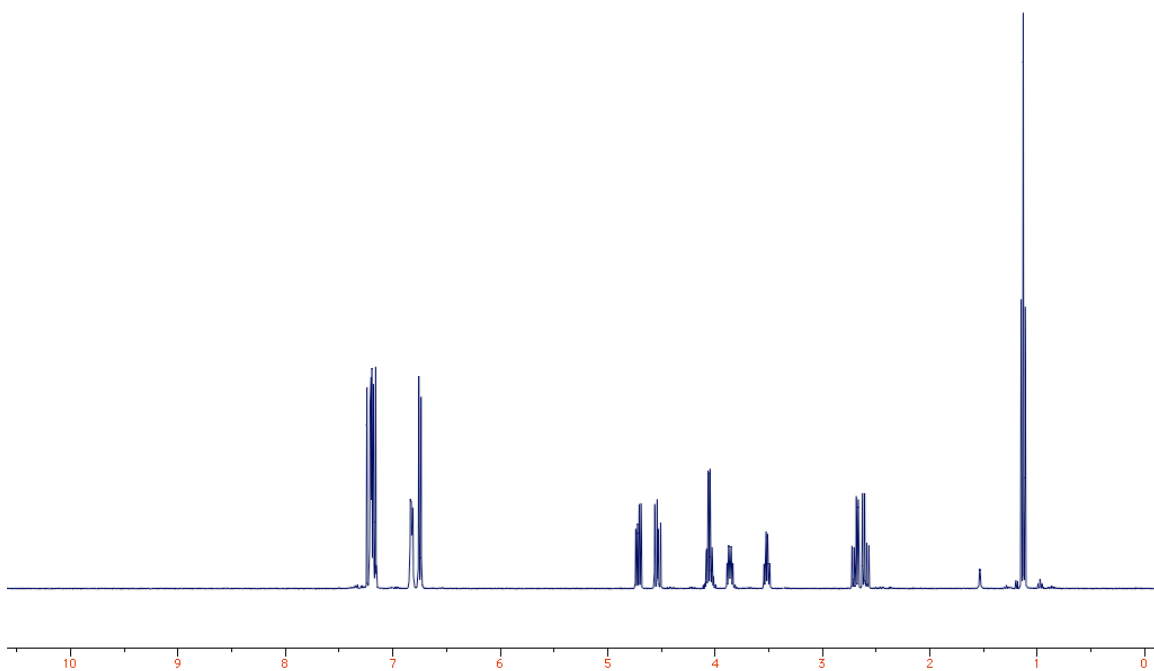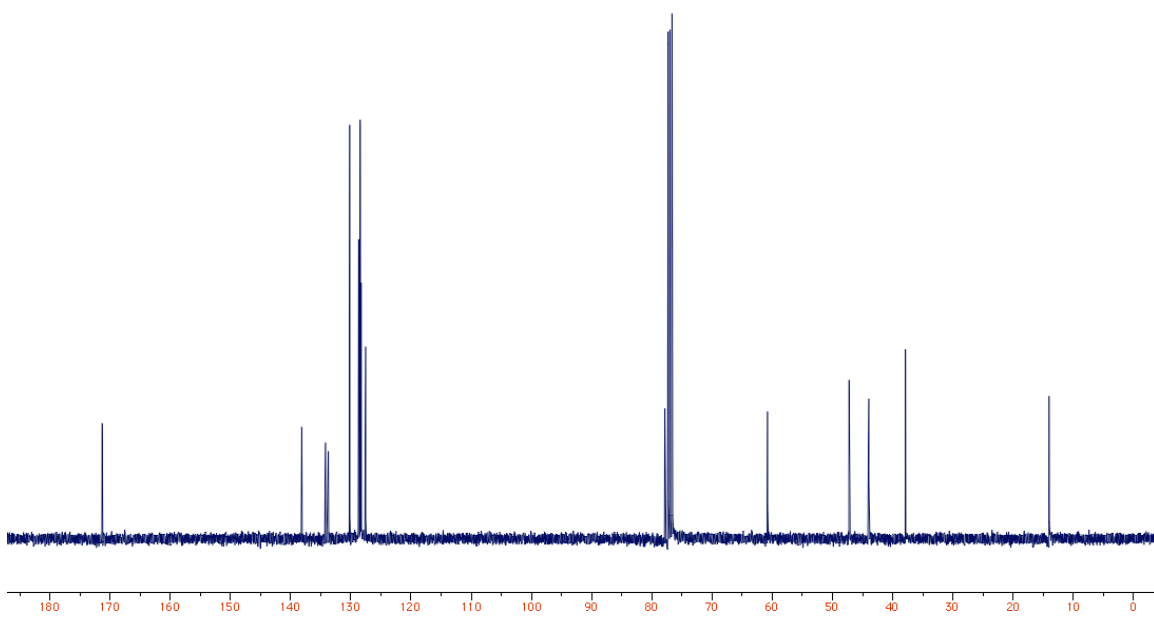

Supporting Information

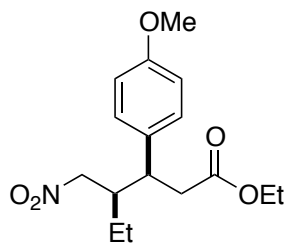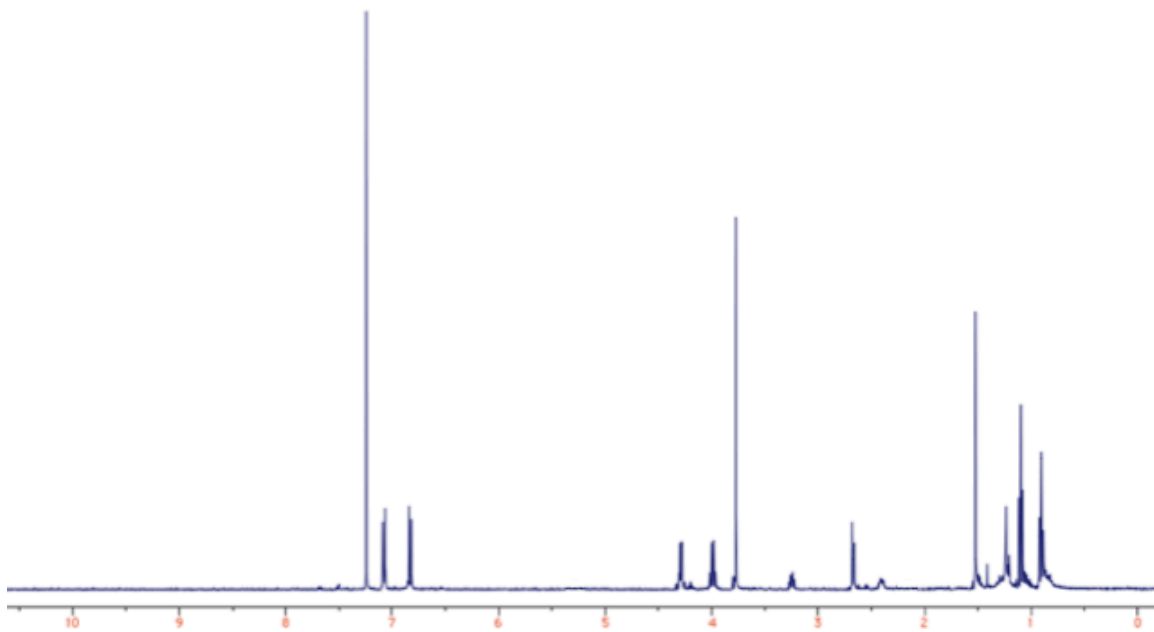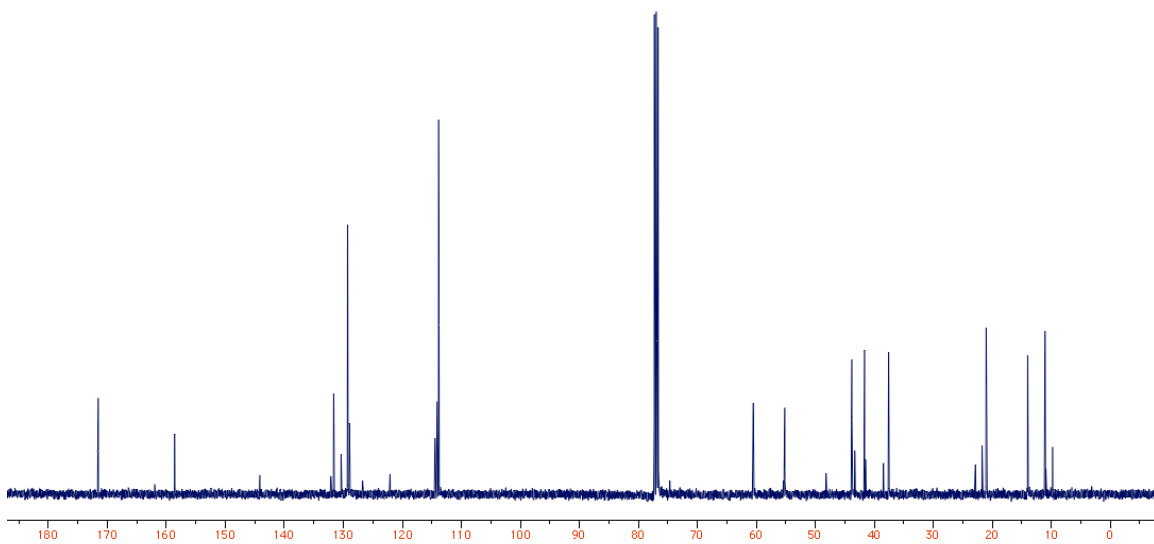

Supporting Information

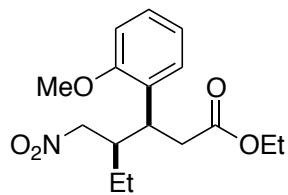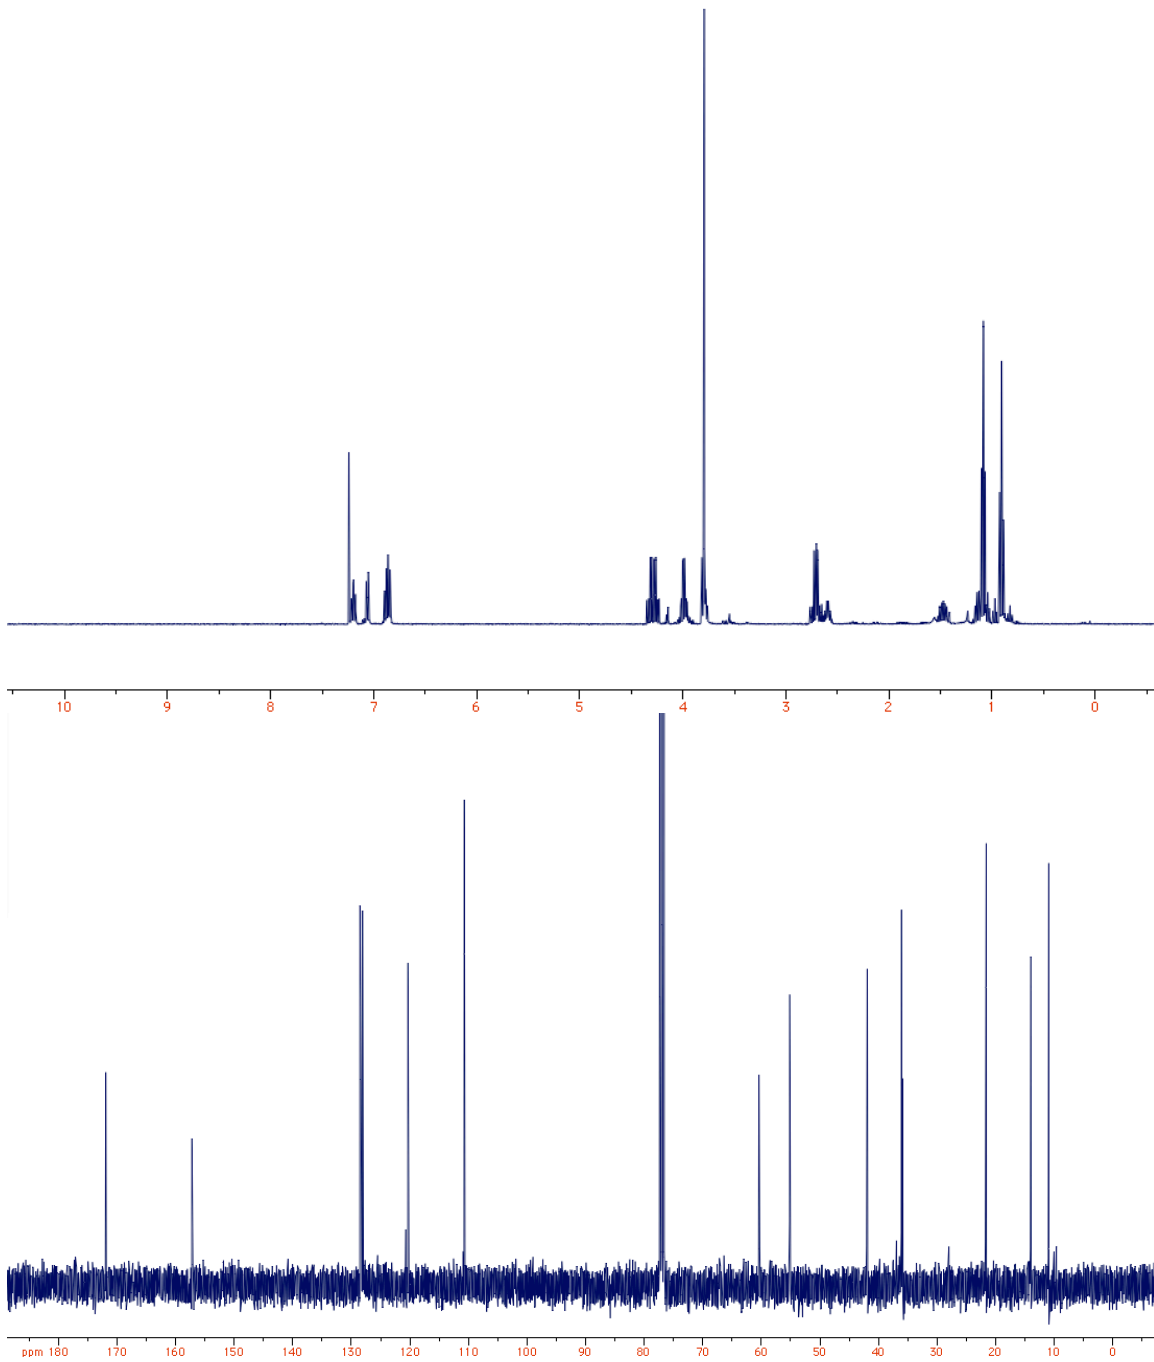

Supporting Information

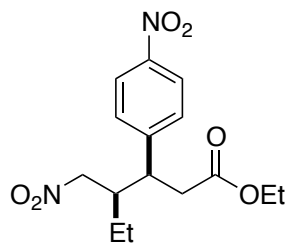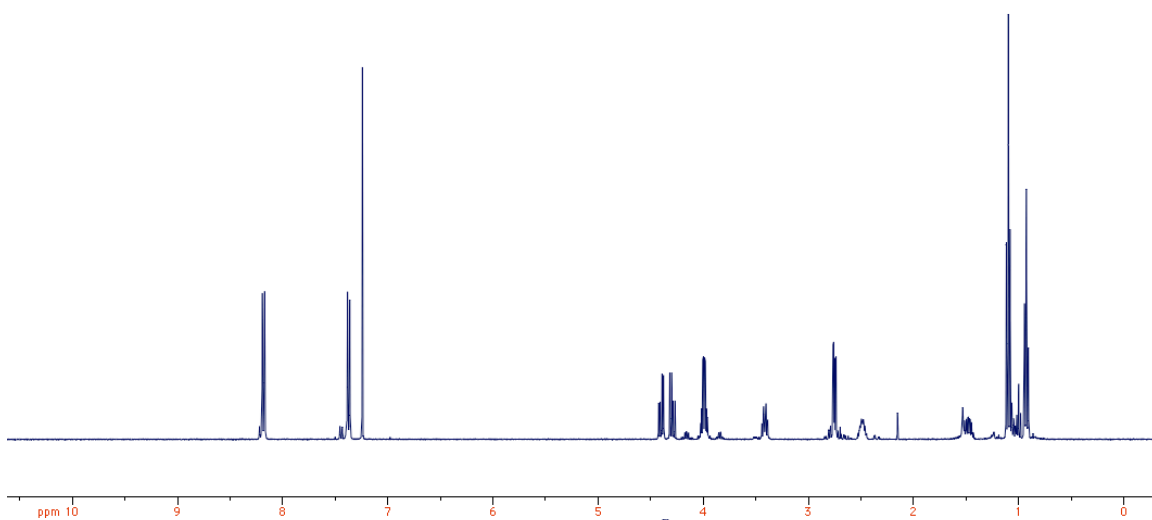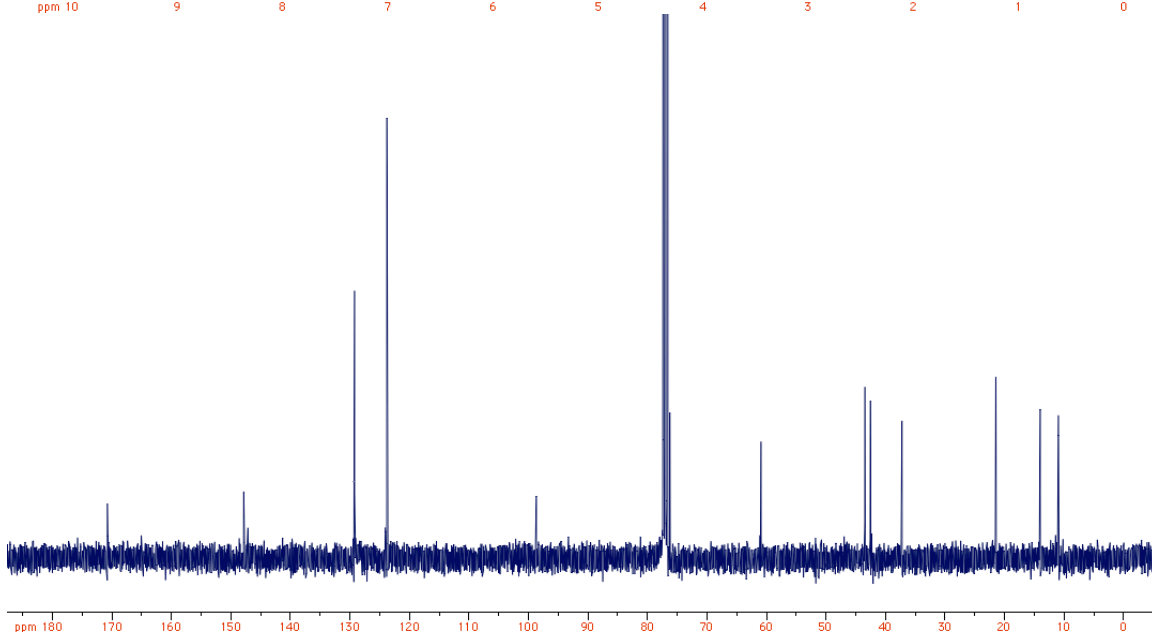

Supporting Information

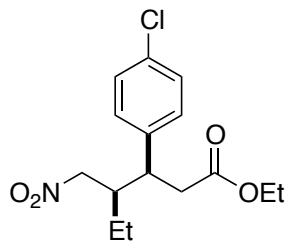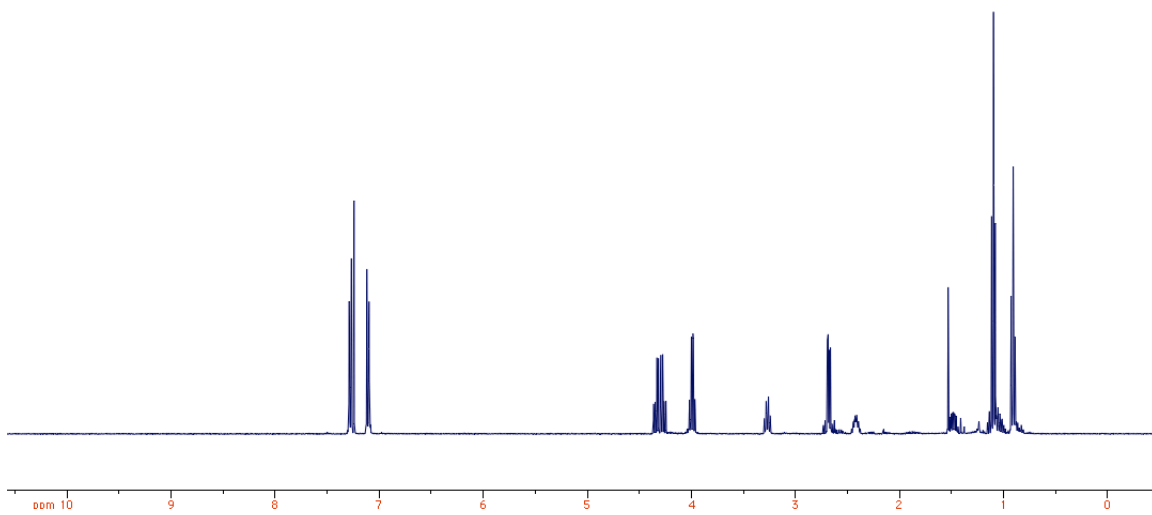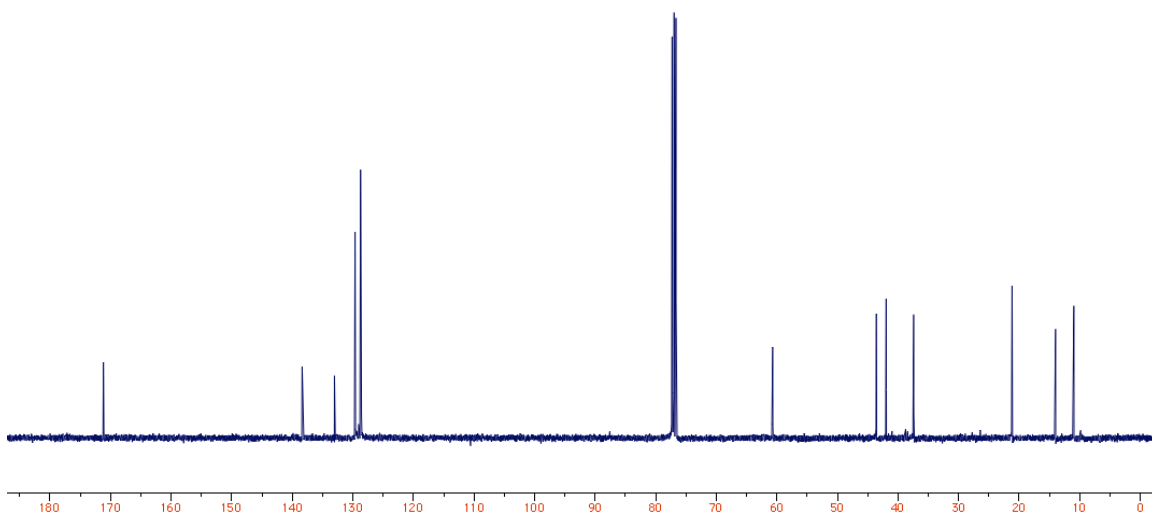

Supporting Information

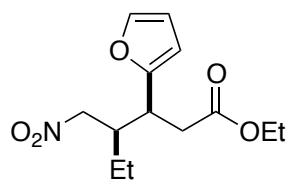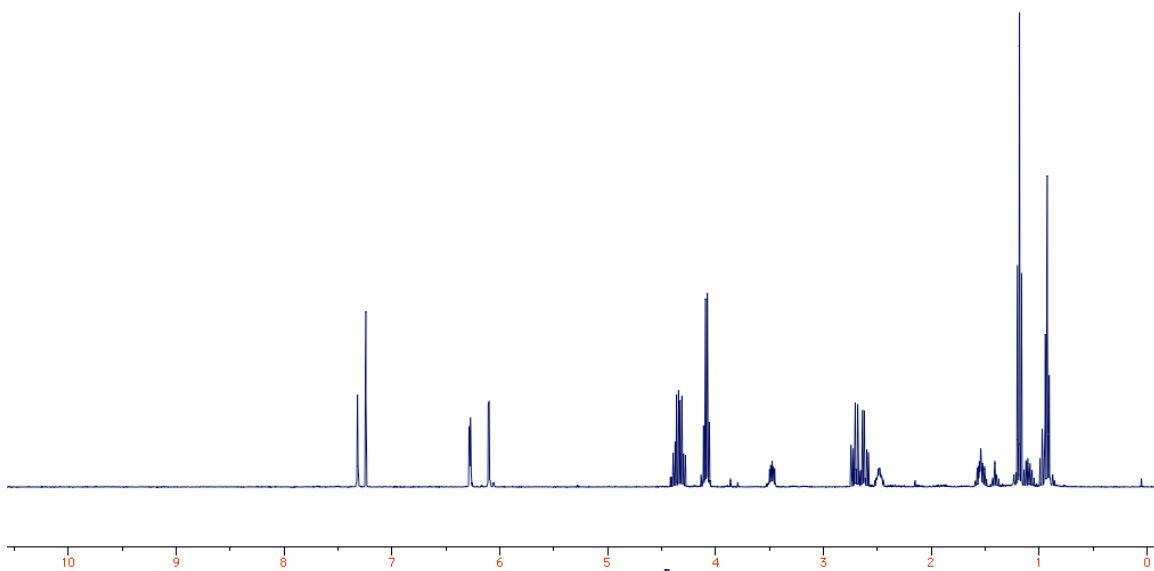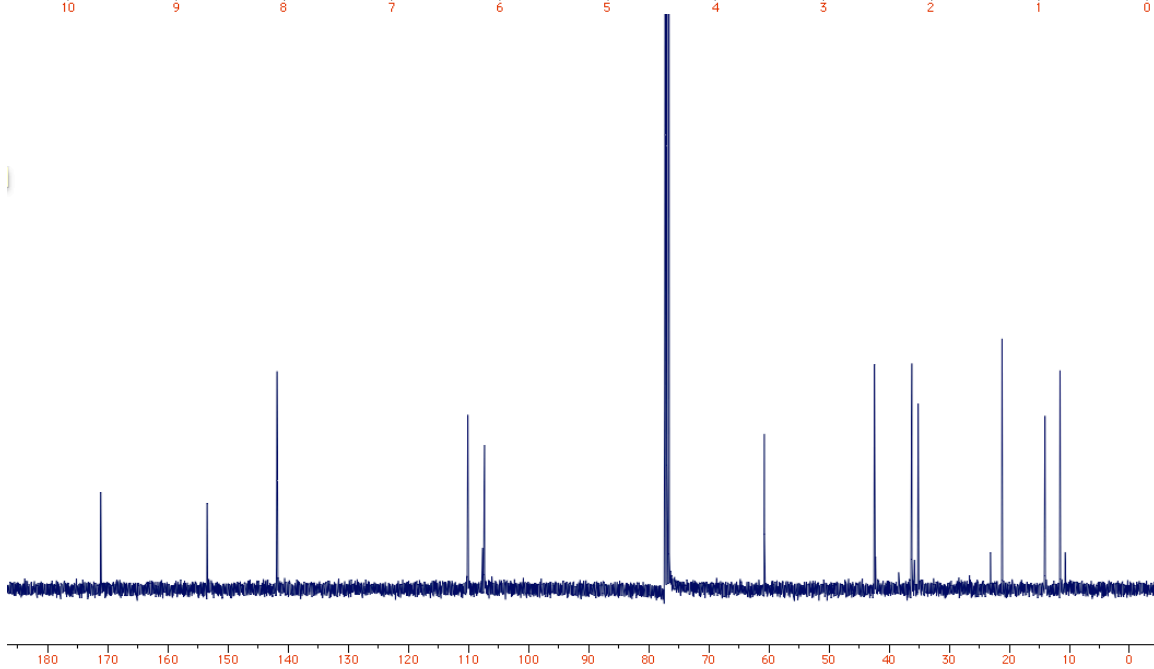

Supporting Information

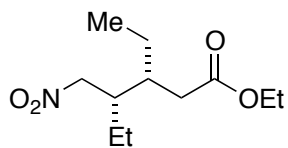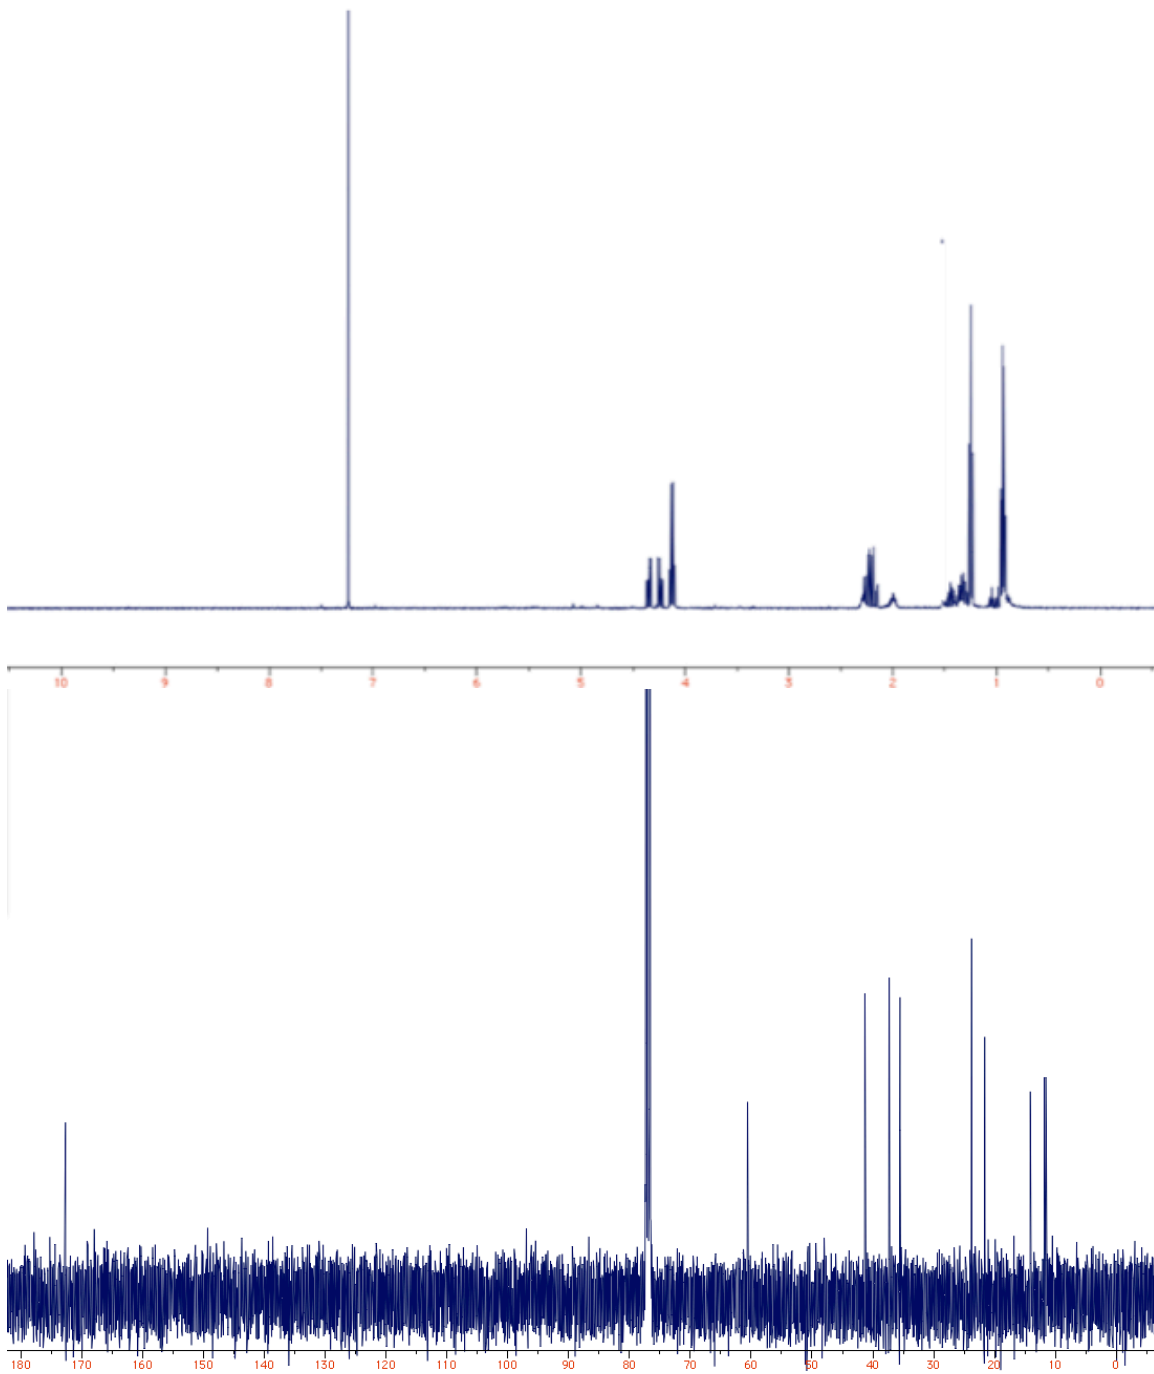

Supporting Information

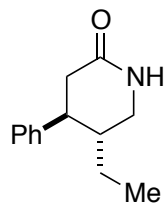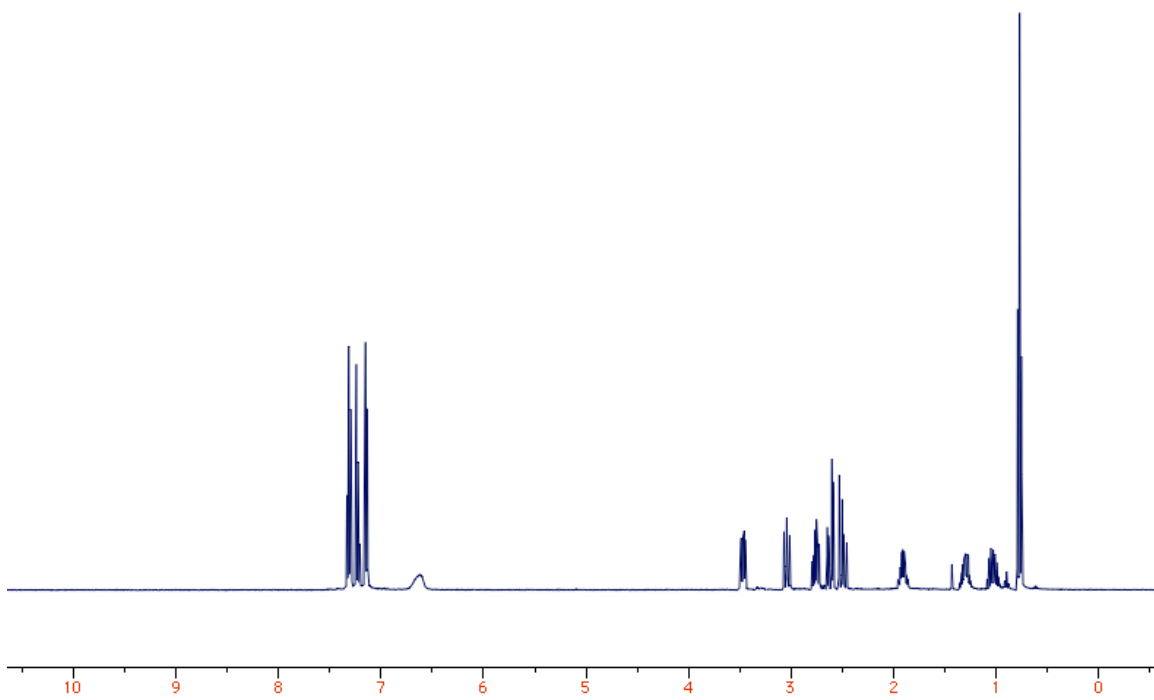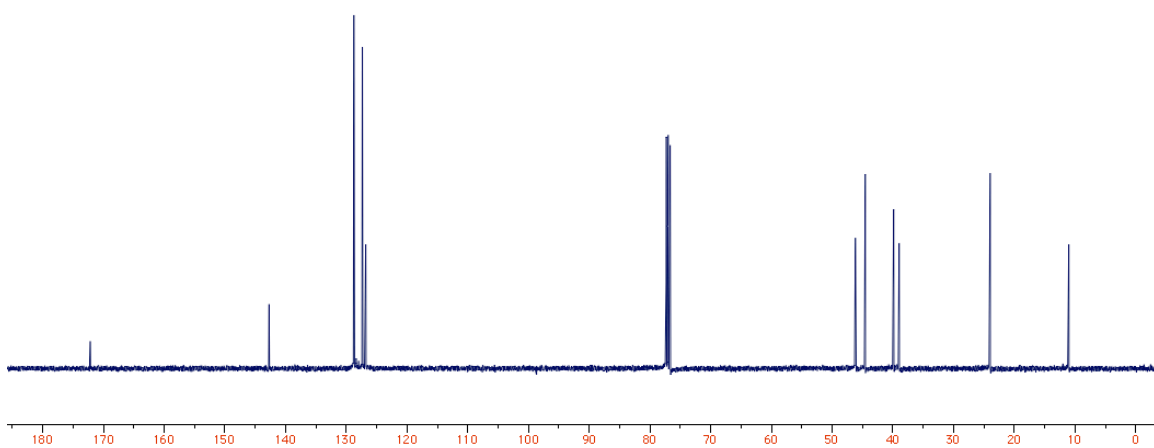



Supporting Information

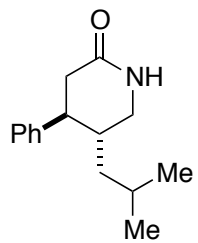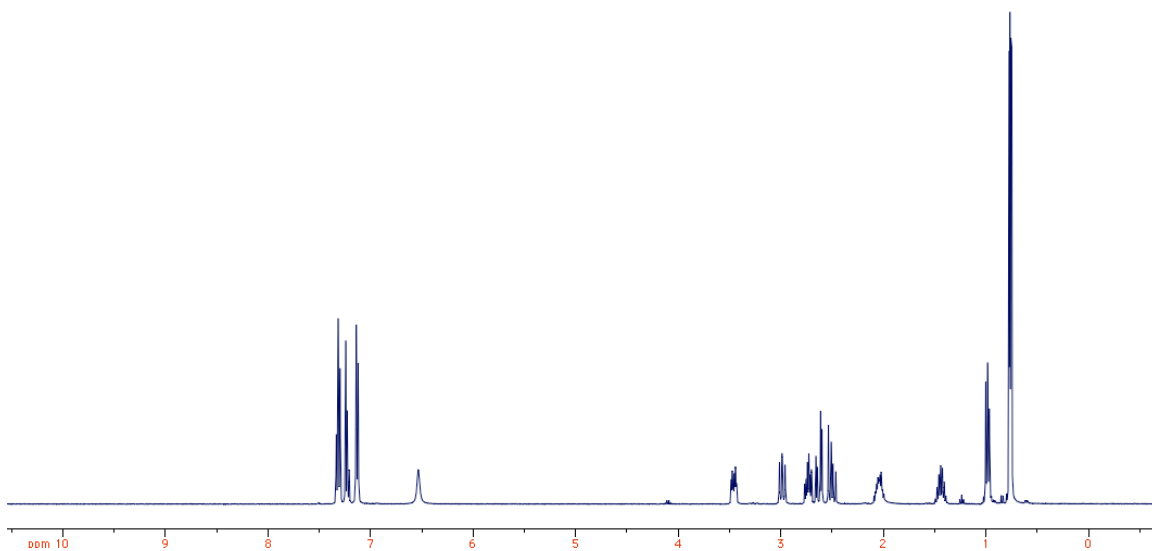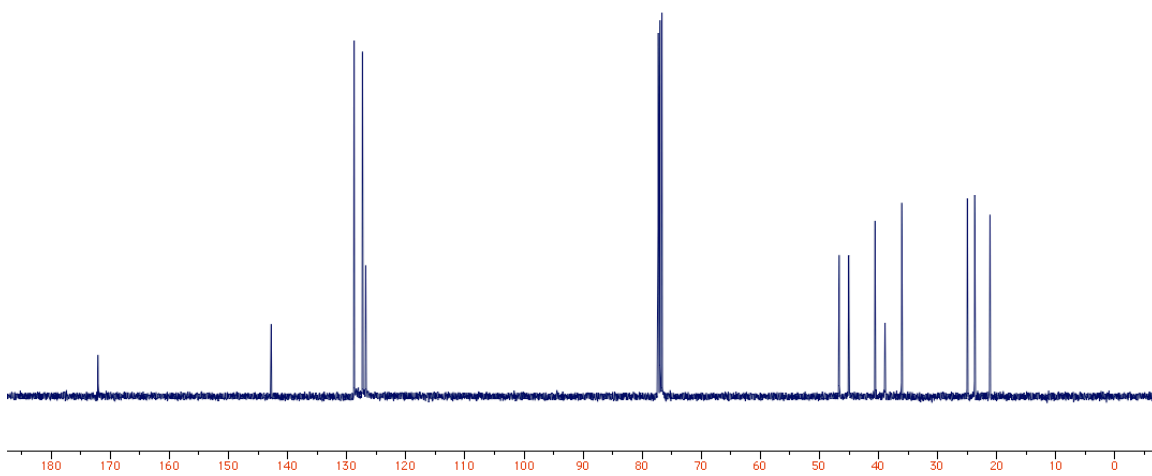

Supporting Information

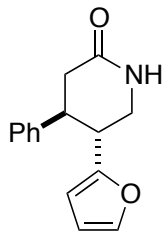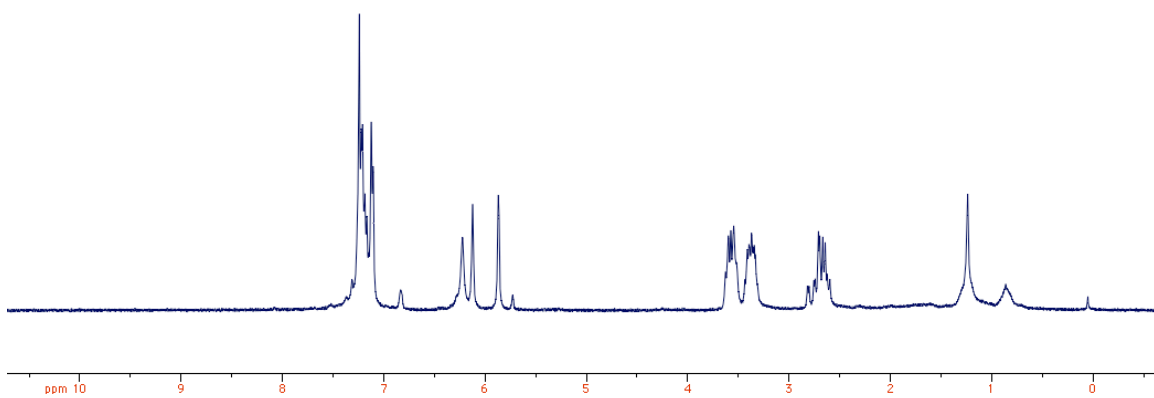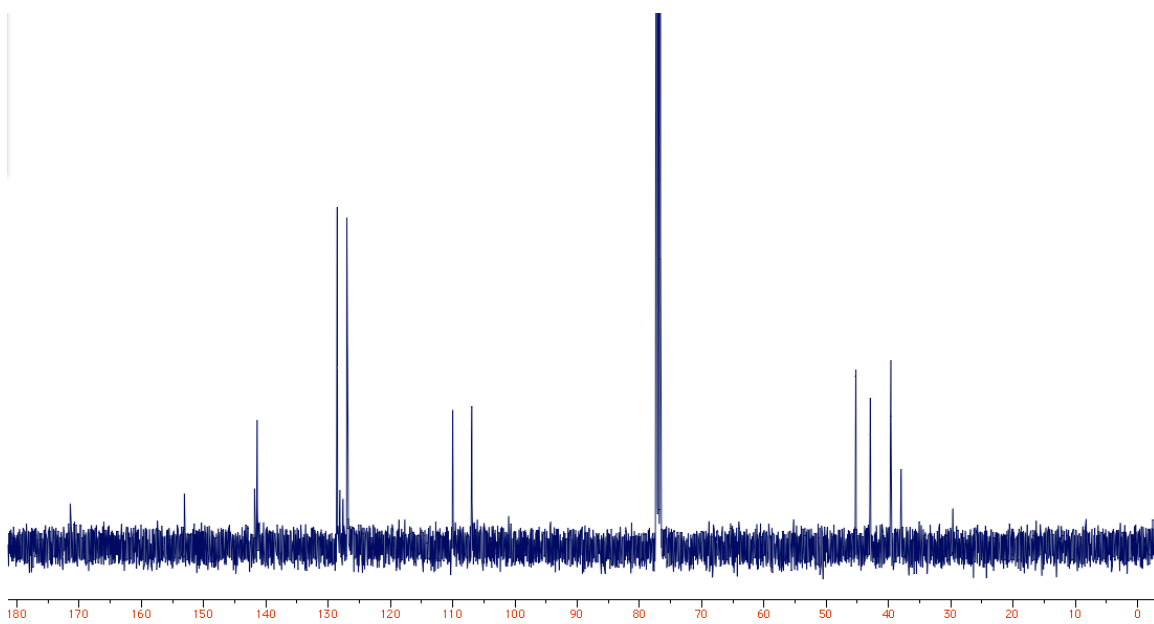

Supporting Information

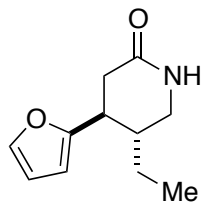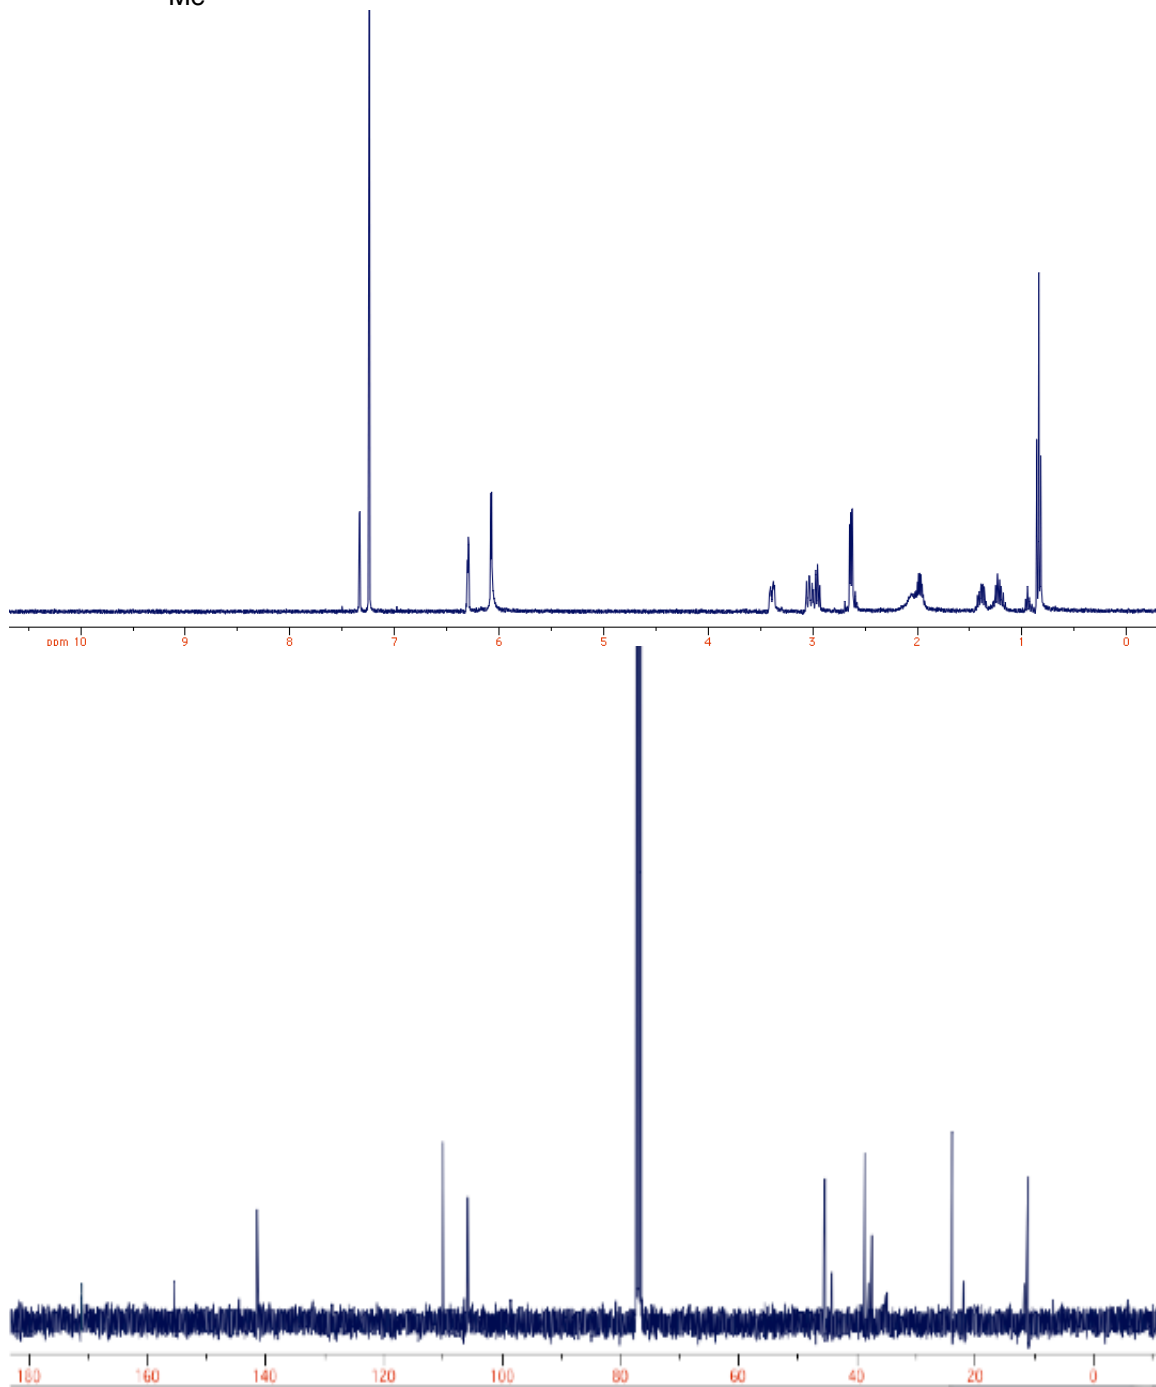

Supporting Information

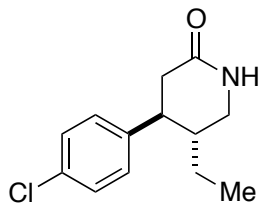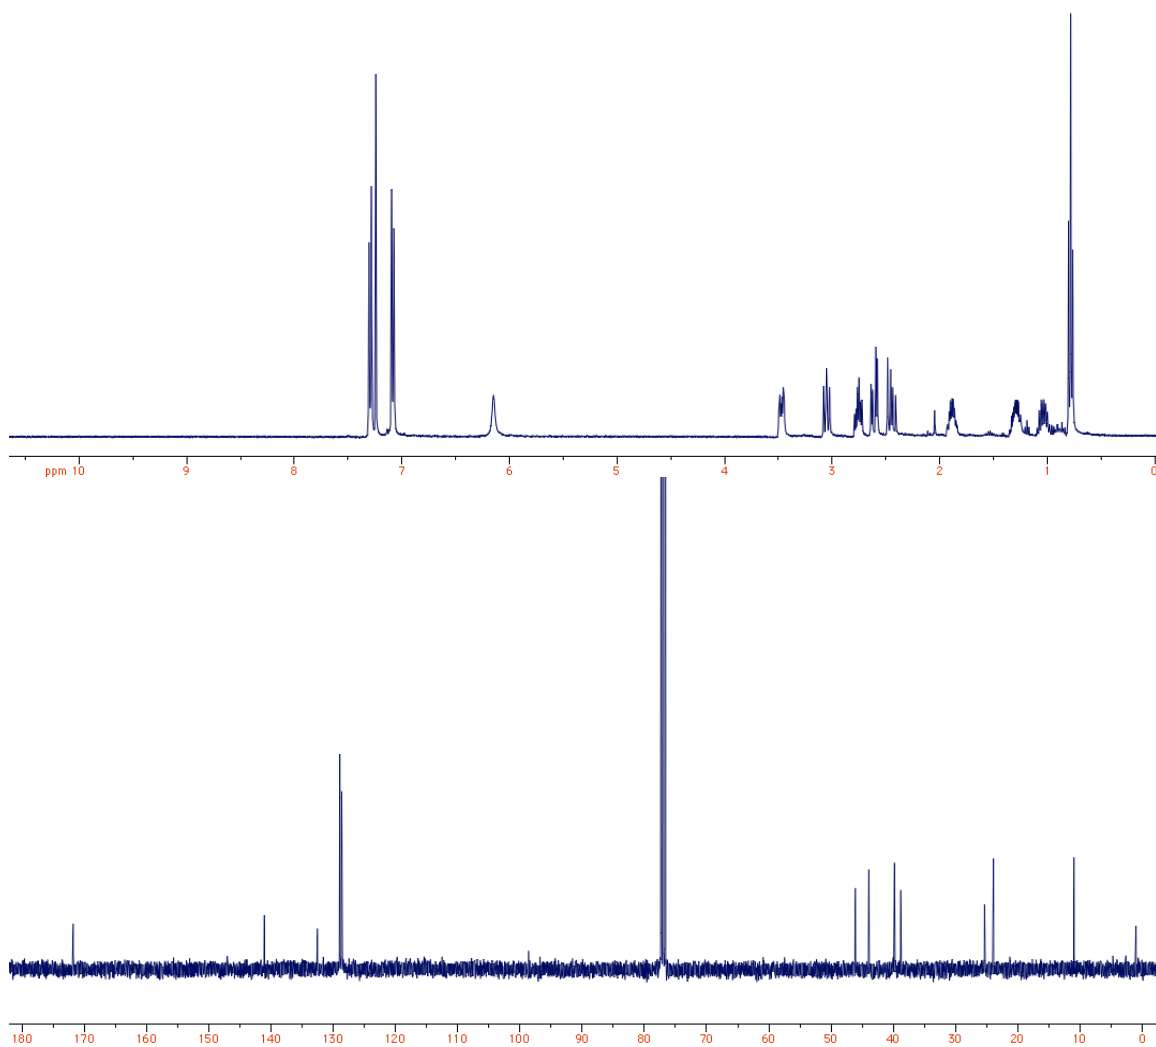

Supporting Information

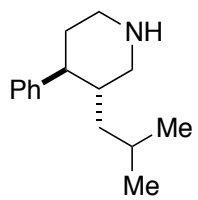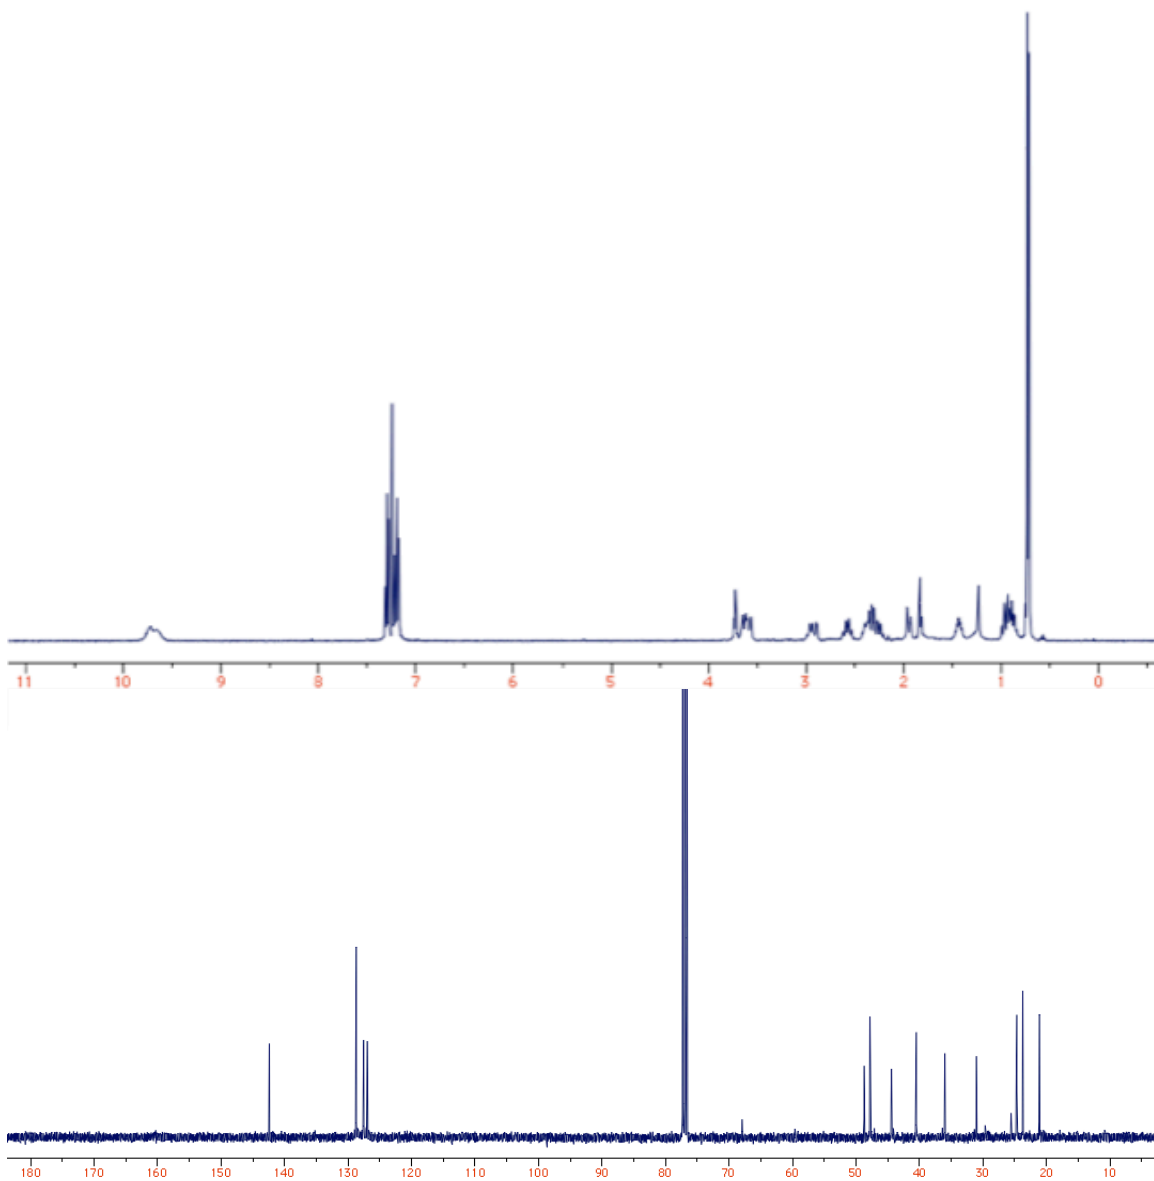

Supporting Information

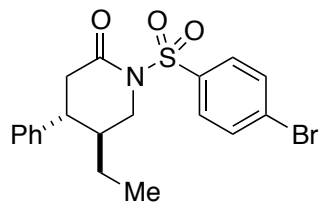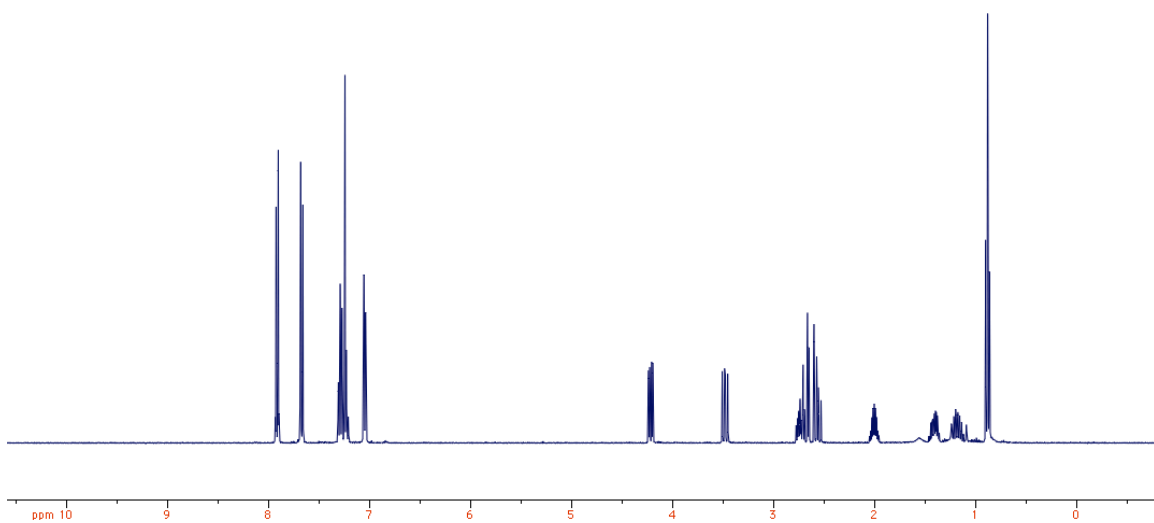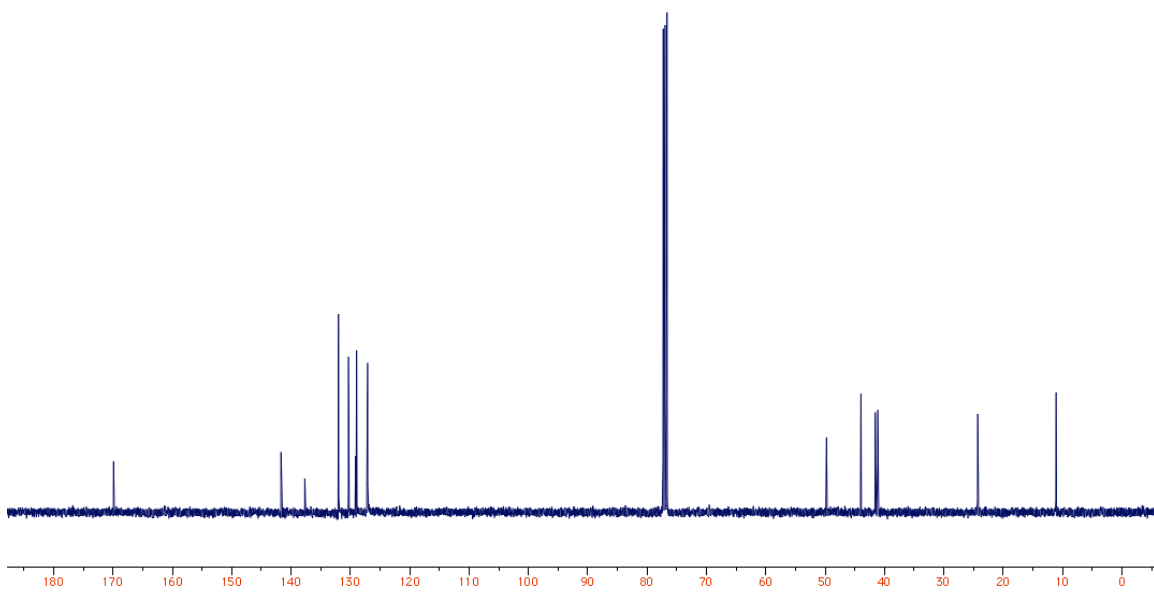

Supporting Information

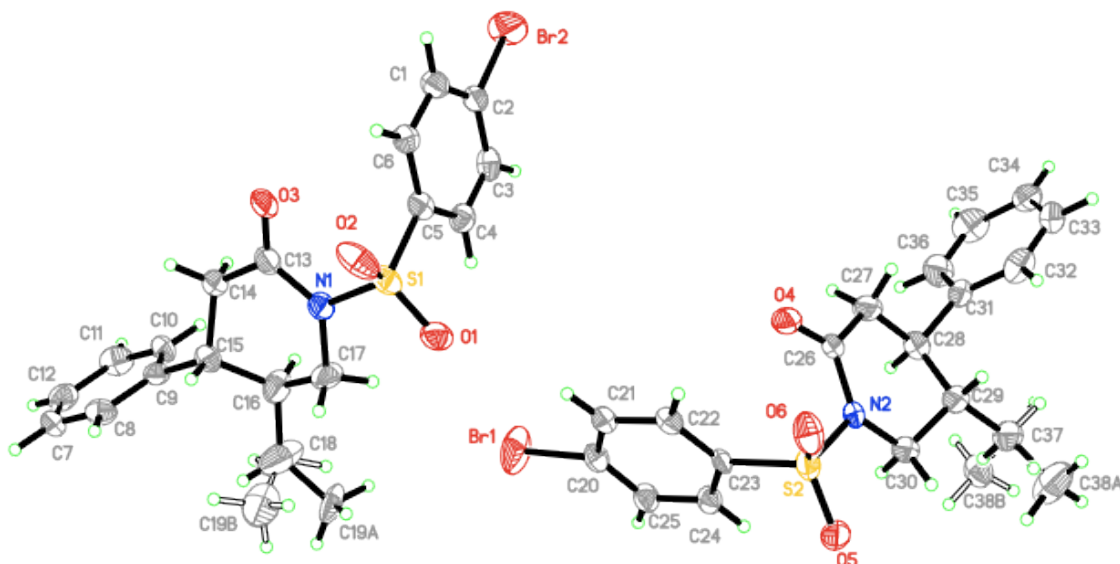

Table 1. Crystal data and structure refinement for Rovis161. S3

|                                 |                                                             |                       |
|---------------------------------|-------------------------------------------------------------|-----------------------|
| Identification code             | rovis161                                                    |                       |
| Empirical formula               | C <sub>19</sub> H <sub>20</sub> Br N O <sub>3</sub> S       |                       |
| Formula weight                  | 422.33                                                      |                       |
| Temperature                     | 120 K                                                       |                       |
| Wavelength                      | 0.71073 Å                                                   |                       |
| Crystal system                  | Monoclinic                                                  |                       |
| Space group                     | <i>P</i> 2 <sub>1</sub>                                     |                       |
| Unit cell dimensions            | <i>a</i> = 5.8036(5) Å                                      | $\alpha$ = 90°.       |
|                                 | <i>b</i> = 21.9511(18) Å                                    | $\beta$ = 95.263(5)°. |
|                                 | <i>c</i> = 14.3746(12) Å                                    | $\gamma$ = 90°.       |
| Volume                          | 1823.5(3) Å <sup>3</sup>                                    |                       |
| <i>Z</i>                        | 4                                                           |                       |
| Density (calculated)            | 1.538 Mg/m <sup>3</sup>                                     |                       |
| Absorption coefficient          | 2.387 mm <sup>-1</sup>                                      |                       |
| <i>F</i> <sub>000</sub>         | 864                                                         |                       |
| Crystal size                    | 0.37 x 0.11 x 0.10 mm <sup>3</sup>                          |                       |
| Theta range for data collection | 1.70 to 26.39°.                                             |                       |
| Index ranges                    | -7 ≤ <i>h</i> ≤ 7, -27 ≤ <i>k</i> ≤ 27, -17 ≤ <i>l</i> ≤ 17 |                       |
| Reflections collected           | 32881                                                       |                       |
| Independent reflections         | 7371 [ <i>R</i> <sub>int</sub> = 0.0412]                    |                       |
| Completeness to theta = 26.39°  | 99.9 %                                                      |                       |
| Absorption correction           | Semi-empirical from equivalents                             |                       |

## Supporting Information

|                                   |                                             |
|-----------------------------------|---------------------------------------------|
| Max. and min. transmission        | 0.8015 and 0.4721                           |
| Refinement method                 | Full-matrix least-squares on F <sup>2</sup> |
| Data / restraints / parameters    | 7371 / 35 / 472                             |
| Goodness-of-fit on F <sup>2</sup> | 1.046                                       |
| Final R indices [I>2sigma(I)]     | R1 = 0.0453, wR2 = 0.0880                   |
| R indices (all data)              | R1 = 0.0659, wR2 = 0.0964                   |
| Absolute structure parameter      | 0.013(10)                                   |
| Largest diff. peak and hole       | 0.927 and -1.456 e.Å <sup>-3</sup>          |

Table 2. Atomic coordinates (  $\times 10^4$ ) and equivalent isotropic displacement parameters ( $\text{\AA}^2 \times 10^3$ ) for Rovis161.  $U(\text{eq})$  is defined as one third of the trace of the orthogonalized  $U^{ij}$  tensor.

|       | x         | y        | z       | U(eq) |
|-------|-----------|----------|---------|-------|
| Br(1) | 1838(1)   | 7724(1)  | 7695(1) | 72(1) |
| Br(2) | 2151(1)   | 5738(1)  | 2630(1) | 61(1) |
| C(1)  | 5687(9)   | 6608(3)  | 3097(4) | 32(1) |
| C(2)  | 3664(10)  | 6352(2)  | 3371(4) | 31(1) |
| C(3)  | 2684(9)   | 6552(3)  | 4154(4) | 32(1) |
| C(4)  | 3729(8)   | 7022(2)  | 4682(4) | 30(1) |
| C(5)  | 5750(9)   | 7278(2)  | 4396(4) | 26(1) |
| C(6)  | 6737(9)   | 7081(2)  | 3612(4) | 28(1) |
| C(7)  | 1001(11)  | 11231(3) | 3885(4) | 38(1) |
| C(8)  | 2398(8)   | 10745(3) | 4210(3) | 33(1) |
| C(9)  | 1637(9)   | 10157(2) | 4109(3) | 26(1) |
| C(10) | -544(9)   | 10054(3) | 3687(4) | 34(1) |
| C(11) | -1920(9)  | 10536(3) | 3358(4) | 40(2) |
| C(12) | -1153(11) | 11120(3) | 3465(4) | 41(2) |
| C(13) | 5245(9)   | 8686(3)  | 3886(4) | 32(1) |
| C(14) | 3688(10)  | 9218(2)  | 3634(4) | 34(1) |
| C(15) | 3238(8)   | 9639(2)  | 4433(3) | 31(1) |
| C(17) | 4235(11)  | 8793(3)  | 5565(4) | 43(2) |
| C(20) | 3572(9)   | 7136(2)  | 8433(4) | 31(1) |



*Supporting Information*

|        |           |         |          |       |
|--------|-----------|---------|----------|-------|
| C(21)  | 5562(9)   | 6907(3) | 8119(4)  | 30(1) |
| C(22)  | 6695(9)   | 6437(2) | 8623(4)  | 28(1) |
| C(23)  | 5795(9)   | 6226(2) | 9425(3)  | 23(1) |
| C(24)  | 3840(8)   | 6477(2) | 9743(4)  | 28(1) |
| C(25)  | 2700(9)   | 6943(3) | 9240(4)  | 32(1) |
| C(26)  | 5094(9)   | 4847(2) | 8895(3)  | 30(1) |
| C(27)  | 3370(10)  | 4348(3) | 8663(4)  | 39(1) |
| C(28)  | 2005(8)   | 4101(2) | 9432(3)  | 35(1) |
| C(30)  | 4225(9)   | 4763(2) | 10582(3) | 32(1) |
| C(31)  | 1101(9)   | 3467(2) | 9118(4)  | 32(1) |
| C(32)  | 2362(9)   | 2932(3) | 9256(4)  | 38(1) |
| C(33)  | 1462(10)  | 2390(3) | 8912(4)  | 40(1) |
| C(34)  | -708(11)  | 2366(3) | 8428(4)  | 44(2) |
| C(35)  | -1948(10) | 2902(3) | 8298(4)  | 49(2) |
| C(36)  | -1023(10) | 3437(3) | 8627(4)  | 43(1) |
| C(16)  | 2435(10)  | 9260(2) | 5213(4)  | 47(2) |
| C(18)  | 1577(17)  | 9596(4) | 6026(5)  | 85(3) |
| C(19A) | 1410(30)  | 9419(6) | 6948(9)  | 63(5) |
| C(19B) | 2960(20)  | 9930(6) | 6518(9)  | 65(3) |
| C(29)  | 3412(9)   | 4113(2) | 10364(3) | 36(1) |
| C(37)  | 2178(10)  | 3845(3) | 11165(4) | 43(1) |
| C(38A) | 3430(20)  | 3780(7) | 12034(8) | 73(4) |
| C(38B) | 29(17)    | 4166(4) | 11370(8) | 41(3) |
| N(1)   | 5379(7)   | 8492(2) | 4801(3)  | 29(1) |
| N(2)   | 5506(7)   | 5021(2) | 9829(3)  | 28(1) |
| O(1)   | 6672(6)   | 7760(2) | 6045(2)  | 41(1) |
| O(2)   | 9311(6)   | 7972(2) | 4846(3)  | 47(1) |
| O(3)   | 6287(7)   | 8431(2) | 3302(3)  | 41(1) |
| O(4)   | 6143(7)   | 5100(2) | 8309(3)  | 36(1) |
| O(5)   | 7009(6)   | 5750(2) | 11052(2) | 41(1) |
| O(6)   | 9431(6)   | 5533(2) | 9774(3)  | 42(1) |
| S(1)   | 7023(2)   | 7873(1) | 5087(1)  | 33(1) |
| S(2)   | 7204(2)   | 5630(1) | 10083(1) | 31(1) |

---

Supporting Information

Table 3. Bond lengths [Å] and angles [°] for Rovis161.

|             |          |                 |           |
|-------------|----------|-----------------|-----------|
| Br(1)-C(20) | 1.900(5) | C(26)-C(27)     | 1.499(8)  |
| Br(2)-C(2)  | 1.886(6) | C(27)-C(28)     | 1.519(7)  |
| C(1)-C(6)   | 1.384(8) | C(28)-C(29)     | 1.504(6)  |
| C(1)-C(2)   | 1.391(7) | C(28)-C(31)     | 1.540(7)  |
| C(2)-C(3)   | 1.378(7) | C(30)-N(2)      | 1.480(6)  |
| C(3)-C(4)   | 1.388(8) | C(30)-C(29)     | 1.527(7)  |
| C(4)-C(5)   | 1.396(7) | C(31)-C(36)     | 1.365(8)  |
| C(5)-C(6)   | 1.379(7) | C(31)-C(32)     | 1.387(7)  |
| C(5)-S(1)   | 1.762(6) | C(32)-C(33)     | 1.374(8)  |
| C(7)-C(12)  | 1.360(9) | C(33)-C(34)     | 1.382(9)  |
| C(7)-C(8)   | 1.394(8) | C(34)-C(35)     | 1.383(9)  |
| C(8)-C(9)   | 1.367(8) | C(35)-C(36)     | 1.359(9)  |
| C(9)-C(10)  | 1.372(8) | C(16)-C(18)     | 1.506(8)  |
| C(9)-C(15)  | 1.515(6) | C(18)-C(19B)    | 1.257(14) |
| C(10)-C(11) | 1.383(8) | C(18)-C(19A)    | 1.394(13) |
| C(11)-C(12) | 1.362(9) | C(29)-C(37)     | 1.530(7)  |
| C(13)-O(3)  | 1.215(6) | C(37)-C(38A)    | 1.394(12) |
| C(13)-N(1)  | 1.377(7) | C(37)-C(38B)    | 1.485(11) |
| C(13)-C(14) | 1.502(8) | N(1)-S(1)       | 1.690(4)  |
| C(14)-C(15) | 1.515(6) | N(2)-S(2)       | 1.681(4)  |
| C(15)-C(16) | 1.505(6) | O(1)-S(1)       | 1.432(4)  |
| C(17)-N(1)  | 1.489(6) | O(2)-S(1)       | 1.419(4)  |
| C(17)-C(16) | 1.517(8) | O(5)-S(2)       | 1.433(3)  |
| C(20)-C(21) | 1.374(7) | O(6)-S(2)       | 1.421(4)  |
| C(20)-C(25) | 1.374(7) | C(6)-C(1)-C(2)  | 119.6(5)  |
| C(21)-C(22) | 1.392(7) | C(3)-C(2)-C(1)  | 121.7(5)  |
| C(22)-C(23) | 1.387(7) | C(3)-C(2)-Br(2) | 118.9(4)  |
| C(23)-C(24) | 1.377(7) | C(1)-C(2)-Br(2) | 119.3(4)  |
| C(23)-S(2)  | 1.769(5) | C(2)-C(3)-C(4)  | 119.4(5)  |
| C(24)-C(25) | 1.385(7) | C(3)-C(4)-C(5)  | 118.3(5)  |
| C(26)-O(4)  | 1.218(6) | C(6)-C(5)-C(4)  | 122.6(5)  |
| C(26)-N(2)  | 1.396(6) | C(6)-C(5)-S(1)  | 120.6(4)  |
|             |          | C(4)-C(5)-S(1)  | 116.9(4)  |
|             |          | C(5)-C(6)-C(1)  | 118.4(5)  |
|             |          | C(12)-C(7)-C(8) | 119.7(6)  |

*Supporting Information*

|                   |          |                     |           |
|-------------------|----------|---------------------|-----------|
| C(9)-C(8)-C(7)    | 120.9(5) | C(33)-C(32)-C(31)   | 120.2(5)  |
| C(8)-C(9)-C(10)   | 118.6(5) | C(32)-C(33)-C(34)   | 120.9(5)  |
| C(8)-C(9)-C(15)   | 119.6(5) | C(33)-C(34)-C(35)   | 118.3(5)  |
| C(10)-C(9)-C(15)  | 121.8(5) | C(36)-C(35)-C(34)   | 120.3(6)  |
| C(9)-C(10)-C(11)  | 120.4(5) | C(35)-C(36)-C(31)   | 122.1(6)  |
| C(12)-C(11)-C(10) | 120.7(5) | C(15)-C(16)-C(18)   | 117.0(5)  |
| C(7)-C(12)-C(11)  | 119.7(6) | C(15)-C(16)-C(17)   | 111.8(4)  |
| O(3)-C(13)-N(1)   | 122.0(5) | C(18)-C(16)-C(17)   | 109.9(5)  |
| O(3)-C(13)-C(14)  | 121.2(5) | C(19B)-C(18)-C(19A) | 74.0(10)  |
| N(1)-C(13)-C(14)  | 116.8(4) | C(19B)-C(18)-C(16)  | 118.8(10) |
| C(13)-C(14)-C(15) | 115.6(4) | C(19A)-C(18)-C(16)  | 131.2(8)  |
| C(16)-C(15)-C(14) | 108.4(4) | C(28)-C(29)-C(30)   | 109.4(4)  |
| C(16)-C(15)-C(9)  | 114.9(4) | C(28)-C(29)-C(37)   | 114.2(5)  |
| C(14)-C(15)-C(9)  | 111.6(4) | C(30)-C(29)-C(37)   | 111.2(4)  |
| N(1)-C(17)-C(16)  | 113.2(4) | C(38A)-C(37)-C(38B) | 104.6(9)  |
| C(21)-C(20)-C(25) | 123.4(5) | C(38A)-C(37)-C(29)  | 118.1(7)  |
| C(21)-C(20)-Br(1) | 118.9(4) | C(38B)-C(37)-C(29)  | 115.2(6)  |
| C(25)-C(20)-Br(1) | 117.7(4) | C(13)-N(1)-C(17)    | 125.3(4)  |
| C(20)-C(21)-C(22) | 118.1(5) | C(13)-N(1)-S(1)     | 117.5(3)  |
| C(23)-C(22)-C(21) | 119.0(5) | C(17)-N(1)-S(1)     | 117.2(3)  |
| C(24)-C(23)-C(22) | 121.8(5) | C(26)-N(2)-C(30)    | 123.0(4)  |
| C(24)-C(23)-S(2)  | 118.2(4) | C(26)-N(2)-S(2)     | 118.2(3)  |
| C(22)-C(23)-S(2)  | 120.0(4) | C(30)-N(2)-S(2)     | 118.0(3)  |
| C(23)-C(24)-C(25) | 119.4(5) | O(2)-S(1)-O(1)      | 118.7(2)  |
| C(20)-C(25)-C(24) | 118.2(5) | O(2)-S(1)-N(1)      | 109.7(2)  |
| O(4)-C(26)-N(2)   | 119.2(5) | O(1)-S(1)-N(1)      | 104.2(2)  |
| O(4)-C(26)-C(27)  | 123.0(5) | O(2)-S(1)-C(5)      | 109.2(2)  |
| N(2)-C(26)-C(27)  | 117.8(4) | O(1)-S(1)-C(5)      | 108.9(3)  |
| C(26)-C(27)-C(28) | 118.7(4) | N(1)-S(1)-C(5)      | 105.1(2)  |
| C(29)-C(28)-C(27) | 111.4(4) | O(6)-S(2)-O(5)      | 119.1(2)  |
| C(29)-C(28)-C(31) | 114.8(4) | O(6)-S(2)-N(2)      | 110.2(2)  |
| C(27)-C(28)-C(31) | 107.3(4) | O(5)-S(2)-N(2)      | 105.1(2)  |
| N(2)-C(30)-C(29)  | 112.0(4) | O(6)-S(2)-C(23)     | 109.4(2)  |
| C(36)-C(31)-C(32) | 118.2(5) | O(5)-S(2)-C(23)     | 108.1(2)  |
| C(36)-C(31)-C(28) | 117.5(5) | N(2)-S(2)-C(23)     | 103.8(2)  |
| C(32)-C(31)-C(28) | 124.1(5) |                     |           |

Symmetry transformations used to generate equivalent atoms:

Table 4. Anisotropic displacement parameters ( $\text{\AA}^2 \times 10^3$ ) for Rovis161. The anisotropic displacement factor exponent takes the form:  $-2p^2 [ h^2 a^* 2U^{11} + \dots + 2 h k a^* b^* U^{12} ]$

|       | U11   | U22   | U33   | U23    | U13   | U12    |
|-------|-------|-------|-------|--------|-------|--------|
| Br(1) | 84(1) | 65(1) | 72(1) | 37(1)  | 33(1) | 50(1)  |
| Br(2) | 75(1) | 55(1) | 54(1) | -19(1) | 10(1) | -37(1) |
| C(1)  | 33(3) | 28(3) | 35(3) | -3(2)  | 6(2)  | 1(2)   |
| C(2)  | 41(3) | 23(3) | 28(3) | 0(2)   | -1(2) | 1(2)   |
| C(3)  | 23(3) | 29(3) | 43(3) | 10(2)  | 3(2)  | 0(2)   |
| C(4)  | 29(3) | 31(3) | 31(3) | 5(2)   | 3(2)  | 5(2)   |
| C(5)  | 22(3) | 25(3) | 31(3) | 1(2)   | -6(2) | 8(2)   |
| C(6)  | 25(3) | 27(3) | 31(3) | 2(2)   | 1(2)  | 4(2)   |
| C(7)  | 57(4) | 23(3) | 35(3) | -4(2)  | 11(3) | -8(2)  |
| C(8)  | 28(3) | 38(3) | 32(2) | -7(2)  | 2(2)  | -2(2)  |
| C(9)  | 29(3) | 26(3) | 22(2) | -3(2)  | 3(2)  | 4(2)   |
| C(10) | 40(3) | 26(3) | 34(3) | -2(2)  | 1(2)  | -12(2) |
| C(11) | 25(3) | 54(4) | 40(3) | -7(3)  | -3(2) | -7(3)  |
| C(12) | 55(4) | 40(3) | 28(3) | 4(3)   | 3(3)  | 16(3)  |
| C(13) | 36(3) | 23(3) | 37(3) | -1(2)  | 12(2) | -1(2)  |
| C(14) | 47(3) | 25(3) | 32(3) | 0(2)   | 12(2) | 3(2)   |
| C(15) | 36(3) | 23(2) | 34(2) | -1(2)  | 4(2)  | 8(2)   |
| C(17) | 59(4) | 42(3) | 28(3) | 0(3)   | 14(3) | 20(3)  |
| C(20) | 35(3) | 23(3) | 36(3) | 1(2)   | 3(2)  | 10(2)  |
| C(21) | 39(3) | 21(3) | 31(3) | -1(2)  | 6(2)  | -2(2)  |
| C(22) | 27(3) | 22(3) | 34(3) | -3(2)  | 5(2)  | 1(2)   |
| C(23) | 29(3) | 13(2) | 26(3) | 1(2)   | -1(2) | 0(2)   |
| C(24) | 29(3) | 24(3) | 31(3) | 2(2)   | 7(2)  | -5(2)  |
| C(25) | 34(3) | 26(3) | 37(3) | 3(2)   | 9(2)  | 6(2)   |
| C(26) | 47(3) | 18(3) | 26(3) | 1(2)   | 8(2)  | 6(2)   |

Supporting Information

|        |         |       |       |        |        |        |
|--------|---------|-------|-------|--------|--------|--------|
| C(27)  | 58(4)   | 30(3) | 29(3) | -5(2)  | 8(2)   | -11(3) |
| C(28)  | 43(3)   | 28(2) | 35(2) | 1(2)   | 5(2)   | 4(2)   |
| C(30)  | 41(3)   | 28(3) | 27(3) | -2(2)  | 4(2)   | -3(2)  |
| C(31)  | 42(3)   | 29(3) | 26(2) | 5(2)   | 4(2)   | -2(2)  |
| C(32)  | 20(2)   | 56(4) | 37(3) | 8(2)   | -6(2)  | -4(2)  |
| C(33)  | 51(4)   | 33(3) | 37(3) | 7(2)   | 2(3)   | 8(3)   |
| C(34)  | 69(4)   | 31(3) | 31(3) | -2(3)  | 4(3)   | -24(3) |
| C(35)  | 35(3)   | 63(5) | 48(4) | -4(3)  | -6(3)  | -16(3) |
| C(36)  | 36(3)   | 44(3) | 47(3) | 0(3)   | -3(3)  | 9(3)   |
| C(16)  | 63(4)   | 40(3) | 42(3) | 13(2)  | 22(3)  | 27(3)  |
| C(18)  | 129(7)  | 93(6) | 35(4) | 7(3)   | 17(4)  | 70(5)  |
| C(19A) | 105(13) | 46(8) | 45(7) | 30(6)  | 43(8)  | 48(8)  |
| C(19B) | 61(8)   | 68(8) | 68(8) | 15(6)  | 24(6)  | 24(5)  |
| C(29)  | 49(3)   | 30(3) | 28(2) | 1(2)   | 5(2)   | -3(2)  |
| C(37)  | 62(4)   | 36(3) | 34(3) | 2(2)   | 12(3)  | -14(3) |
| C(38A) | 89(10)  | 82(9) | 43(6) | 14(6)  | -13(6) | -44(8) |
| C(38B) | 41(6)   | 33(5) | 49(6) | 4(5)   | 12(5)  | -6(4)  |
| N(1)   | 31(2)   | 25(2) | 32(2) | 1(2)   | 6(2)   | 8(2)   |
| N(2)   | 42(3)   | 17(2) | 26(2) | 3(2)   | 2(2)   | -2(2)  |
| O(1)   | 55(2)   | 32(2) | 32(2) | -5(2)  | -8(2)  | 14(2)  |
| O(2)   | 27(2)   | 36(2) | 78(3) | -21(2) | -1(2)  | -4(2)  |
| O(3)   | 58(3)   | 21(2) | 47(2) | -2(2)  | 24(2)  | 6(2)   |
| O(4)   | 49(2)   | 31(2) | 30(2) | -3(2)  | 15(2)  | -3(2)  |
| O(5)   | 59(2)   | 32(2) | 29(2) | 0(2)   | -13(2) | -12(2) |
| O(6)   | 29(2)   | 34(2) | 61(2) | 11(2)  | -2(2)  | 2(2)   |
| S(1)   | 31(1)   | 25(1) | 41(1) | -5(1)  | -4(1)  | 7(1)   |
| S(2)   | 34(1)   | 23(1) | 35(1) | 5(1)   | -5(1)  | 0(1)   |

---

Table 5. Hydrogen coordinates ( $\times 10^4$ ) and isotropic displacement parameters ( $\text{\AA}^2 \times 10^3$ ) for Rovis161.

---

---

|  | x | y | z | U(eq) |
|--|---|---|---|-------|
|--|---|---|---|-------|

---

*Supporting Information*

---

|        |       |       |       |     |
|--------|-------|-------|-------|-----|
| H(1)   | 6329  | 6462  | 2571  | 38  |
| H(3)   | 1335  | 6373  | 4327  | 38  |
| H(4)   | 3099  | 7164  | 5214  | 36  |
| H(6)   | 8078  | 7262  | 3435  | 33  |
| H(7)   | 1541  | 11629 | 3955  | 45  |
| H(8)   | 3868  | 10822 | 4501  | 40  |
| H(10)  | -1100 | 9657  | 3621  | 40  |
| H(11)  | -3383 | 10460 | 3061  | 48  |
| H(12)  | -2099 | 11442 | 3251  | 49  |
| H(14A) | 2214  | 9064  | 3358  | 41  |
| H(14B) | 4364  | 9456  | 3159  | 41  |
| H(15)  | 4726  | 9820  | 4663  | 37  |
| H(17A) | 5405  | 8992  | 5985  | 51  |
| H(17B) | 3500  | 8484  | 5919  | 51  |
| H(21)  | 6136  | 7062  | 7584  | 36  |
| H(22)  | 8035  | 6267  | 8426  | 33  |
| H(24)  | 3289  | 6335  | 10290 | 34  |
| H(25)  | 1380  | 7120  | 9443  | 38  |
| H(27A) | 4189  | 4010  | 8411  | 47  |
| H(27B) | 2268  | 4496  | 8165  | 47  |
| H(28)  | 662   | 4366  | 9474  | 42  |
| H(30A) | 2893  | 5018  | 10665 | 39  |
| H(30B) | 5217  | 4765  | 11163 | 39  |
| H(32)  | 3822  | 2941  | 9583  | 46  |
| H(33)  | 2323  | 2035  | 9006  | 48  |
| H(34)  | -1317 | 1998  | 8196  | 52  |
| H(35)  | -3421 | 2896  | 7983  | 59  |
| H(36)  | -1864 | 3794  | 8515  | 51  |
| H(16)  | 1110  | 9025  | 4935  | 56  |
| H(18A) | 2494  | 9966  | 6076  | 102 |
| H(18B) | 23    | 9724  | 5803  | 102 |
| H(18C) | 286   | 9849  | 5784  | 102 |
| H(18D) | 970   | 9297  | 6435  | 102 |

### Supporting Information

|        |       |       |       |     |
|--------|-------|-------|-------|-----|
| H(19A) | 762   | 9747  | 7283  | 95  |
| H(19B) | 2916  | 9321  | 7237  | 95  |
| H(19C) | 421   | 9068  | 6959  | 95  |
| H(19D) | 2183  | 10110 | 7010  | 97  |
| H(19E) | 3531  | 10245 | 6136  | 97  |
| H(19F) | 4239  | 9689  | 6784  | 97  |
| H(29)  | 4797  | 3865  | 10305 | 43  |
| H(37A) | 846   | 4099  | 11249 | 52  |
| H(37B) | 1594  | 3446  | 10971 | 52  |
| H(37C) | 1796  | 3423  | 11019 | 52  |
| H(37D) | 3244  | 3847  | 11726 | 52  |
| H(38A) | 2455  | 3609  | 12470 | 109 |
| H(38B) | 3983  | 4171  | 12253 | 109 |
| H(38C) | 4727  | 3514  | 11976 | 109 |
| H(38D) | -636  | 3965  | 11874 | 61  |
| H(38E) | -1056 | 4162  | 10824 | 61  |
| H(38F) | 390   | 4580  | 11543 | 61  |

---

### References:

- (1) DiRocco, D. A.; Oberg, K. M.; Dalton D. M., Rovis, T, *J. Am. Chem. Soc.* **2009**, *131*, 10872 – 10874.
- (2) Ostendorf, M.; Dijkink, J.; Rutjes, F.; Hiemstra, H. *Eur. J. Org. Chem.* **2000**, *1*, 115-124.
